# Supplementary material
Source: MDPI journal article supplement (https://www.mdpi.com/2071-1050/13/1/315)
Supplement: s1 [file s1]

## Sheet: Start
Complete List	List of all references and statements
P1, P2, P3…	References clustered by their central purpose, as described in section 3.1 of the article

## Sheet: Complete List
Year	Author(s)	Region of Corresp. Author's Institution	Title	Publication Type	Publication Body	Primary Purpose of Publication	Direct Quote from Reference	past/ present (was/is)	future (will/ should/ could)	Statement reduced	RQ1	RQ2	RQ3	RQ4	RQ5	Terminology	Covered	Mentioned in section…
1994	Keioleian, Menerey	NAR	Sustainable Development by Design: Review of Life Cycle Design and Related Approaches	Journal Publication	Air and Waste	Introduce a new framework	Green design and related concepts have been proposed as one possible means of achieving a sustainable economy, even though they often lack clear definitions of system boundaries, goals and objectives, principles, and environmental metrics.	x		a unified ecodesign concept is missing	x	x	x			Life Cycle Design	x	x.x.x
1994	Keioleian, Menerey	NAR	Sustainable Development by Design: Review of Life Cycle Design and Related Approaches	Journal Publication	Air and Waste	Introduce a new framework	At present, implementing the life cycle design framework requires significant organizational and operational changes in business. Each product system is highly interconnected to other product systems, forming a complex web which is often difficult to disentangle for a product development team.	x		organizational and operational changes required to support ecodesign implementation			x			Life Cycle Design	x
1994	Keioleian, Menerey	NAR	Sustainable Development by Design: Review of Life Cycle Design and Related Approaches	Journal Publication	Air and Waste	Introduce a new framework	In order to effectively promote the goals of sustainable development, life cycle designs must successfully address cost, performance, cultural and legal factors. Environmental objectives clearly cannot be pursued in isolation from these other factors.		x	environmental factors must not be viewed in isolation			x			Life Cycle Design	x
1994	Keioleian, Menerey	NAR	Sustainable Development by Design: Review of Life Cycle Design and Related Approaches	Journal Publication	Air and Waste	Introduce a new framework	The ultimate challenge in life cycle design is to choose the best strategies and synthesize them into designs that satisfy the full spectrum of requirements. Technology and thermodynamics constrain design capabilities, but societal values strongly influence product acceptance. Design changes for fostering sustainable development may thus have to be accompanied by changes in behavior.		x	individual behavioral change needed to achieve sustainability			x			Life Cycle Design	x
1994	Keioleian, Menerey	NAR	Sustainable Development by Design: Review of Life Cycle Design and Related Approaches	Journal Publication	Air and Waste	Introduce a new framework	Access to reliable environmental data may be considered the greatest internal need for those implementing life cycle design. Participants must have access to the same quality of information regarding environmental impacts that they have for cost and performance evaluations.		x	there is a lack of environmental data			x			Life Cycle Design	x
1994	Keioleian, Menerey	NAR	Sustainable Development by Design: Review of Life Cycle Design and Related Approaches	Journal Publication	Air and Waste	Introduce a new framework	Once this information is available, the development team then requires metrics for evaluating environmental impacts associated with the product system. At present, simple tools for determining environmental profiles give an incomplete picture, while more elaborate tools such as LCA [life cycle assassment] are still under development and have many practical limitations in design.	x		there is a lack of quantitative assessment tools			x	x		Life Cycle Design	x
1994	Keioleian, Menerey	NAR	Sustainable Development by Design: Review of Life Cycle Design and Related Approaches	Journal Publication	Air and Waste	Introduce a new framework	In addition, because incommensurable data is a fundamental problem in environmental evaluation, it will always be necessary to make value judgments regarding dissimilar environmental impacts.		x	value judgments by designers are inevitable			x			Life Cycle Design	x
1994	Keioleian, Menerey	NAR	Sustainable Development by Design: Review of Life Cycle Design and Related Approaches	Journal Publication	Air and Waste	Introduce a new framework	Design analysis is further complicated when environmental criteria are compared with cost, performance and other factors. Although designers/designers/engineers routinely make difficult choices, environmental analysis of life cycle issues adds another layer of complexity to a process that is already under significant time and cost pressures.	x		ecodesign increases complexity in product development			x			Life Cycle Design	x
1994	Keioleian, Menerey	NAR	Sustainable Development by Design: Review of Life Cycle Design and Related Approaches	Journal Publication	Air and Waste	Introduce a new framework	A corporation's environmental management system must be responsive to external factors influencing design such as government regulations, market forces, infrastructure, and state of the environment, as well as scientific understanding and public perception of risks.		x	environmental management systems (EMS) must be responsive to external factors			x	x	x	Life Cycle Design	x
1994	Keioleian, Menerey	NAR	Sustainable Development by Design: Review of Life Cycle Design and Related Approaches	Journal Publication	Air and Waste	Introduce a new framework	Current regulations and economic instruments are not optimal for supporting life cycle design. [...] New policies and practices may have to be phased in to minimize economic dislocations. If a more sustainable economic system can be realized, interdisciplinary participation will then be the key to developing product systems that reflect multistakeholder (suppliers, manufacturers, consumers, resou…		x	new regulation needed to enable ecodesign: minimize economic dislocations, foster interdisciplinary multi-stakeholder participation			x			Life Cycle Design	x
1995	Alting, Legarth	EU	Life Cycle Engineering and Design	Journal Publication	CIRP Annals	Provide a general / historical overview of the field	First and foremost a change in perception is needed to put emphasis on the holistic quality of life cycle engineering, through interdisciplinary cooperation between politicians, economists, scientists and designers/engineers.		x	interdisciplinary cooperation needed among disciplines, roles and organizations			x			Life Cycle Engineering, Life Cycle Design	x
1995	Alting, Legarth	EU	Life Cycle Engineering and Design	Journal Publication	CIRP Annals	Provide a general / historical overview of the field	Consumer awareness and not least the growing pressure from grass roots and NGOs is changing the citizens attitude towards industry. Only those companies with a clear view on this can hope for a continued prosperity.		x	consumer awareness and activism puts pressure on industry		x	x			Life Cycle Engineering, Life Cycle Design	x
1995	Alting, Legarth	EU	Life Cycle Engineering and Design	Journal Publication	CIRP Annals	Provide a general / historical overview of the field	The life cycle concept will gradually disseminate into other industries, like the food industry, the textile industry and the building industry. […] We will see a growing focus on also small and medium- size companies, where a business-line approach to the organization of life cycle engineering initiatives may prevail.		x	the ecodesign concept will spread across industries and to small and medium sized enterprizes (SME)		x	x			Life Cycle Engineering, Life Cycle Design	x
1995	Alting, Legarth	EU	Life Cycle Engineering and Design	Journal Publication	CIRP Annals	Provide a general / historical overview of the field	One important area of future activity is the internalization of environmental externalities in cost calculations.	x		environmental externalities not yet internalized in cost calculations			x			Life Cycle Engineering, Life Cycle Design	x
1995	Alting, Legarth	EU	Life Cycle Engineering and Design	Journal Publication	CIRP Annals	Provide a general / historical overview of the field	To save precious natural resources, product end-of-life design initiatives along with increased technological development in the recycling industry will bring about closed anthropogenetic material flows, where we reutilize natural resources again and again. To facilitate this we not only need a widespread use of DfD [design for disassembly] methods and tools, but we also need to focus on new mate…		x	there is a need for new materials, technologies, industrial processes			x			Life Cycle Engineering, Life Cycle Design	x
1995	Lenox, Ehrenfeld	NAR	Design for Environment: A New Framework for Strategic Decisions	Journal Publication	Total Quality Environmental Management	Introduce a new framework	Current and pending regulations as well as potential liability and consumer demand, pose significant financial and competitive hardships on firms that fail to manage environmental impacts. [...] Environmental regulations will affect not only domestic activity but will be important in international trade. Furthermore, the growing acceptance of voluntary codes of conduct [...] will place even great…		x	firms need to proactively embrace ecodesign to anticipate consumer demand, liability issues, new regulation and codes of conduct and increase competitiveness		x	x			Design for Environment	x
1995	Lenox, Ehrenfeld	NAR	Design for Environment: A New Framework for Strategic Decisions	Journal Publication	Total Quality Environmental Management	Introduce a new framework	Knowledge of potential environmental impacts is not always available during the design phase and, if it is, resides in places other than the designers' corporate homes or may be missing from the firm as a whole. Typically, the time and cost of collecting sufficient data to address environmental concerns are unacceptable, relative to the resources available for any given project.	x		there is a lack of environmental data			x			Design for Environment	x
1995	Lenox, Ehrenfeld	NAR	Design for Environment: A New Framework for Strategic Decisions	Journal Publication	Total Quality Environmental Management	Introduce a new framework	The difficulty in aggregating environmental impacts into meaningful measures of environmental performance complicates matters further.	x		there is a lack of quantitative assessment tools			x	x		Design for Environment	x
1995	Lenox, Ehrenfeld	NAR	Design for Environment: A New Framework for Strategic Decisions	Journal Publication	Total Quality Environmental Management	Introduce a new framework	Finally, in the real world, environmental objectives will always be compared to and traded off with other objectives, particularly cost and performance. These last two are certainly dominant in the design and development of products competing in consumer markets.		x	trade-offs are inevitable in ecodesign			x			Design for Environment	x
1995	Lenox, Ehrenfeld	NAR	Design for Environment: A New Framework for Strategic Decisions	Journal Publication	Total Quality Environmental Management	Introduce a new framework	Having extensive data on the impacts and their consequences is essential, but the information does not tell designers what features they should introduce into the products and processes to avoid these impacts, except for some of the more obvious cases of substitutes for or minimizing the use of harmful pollutants.	x		value judgments by designers are inevitable			x			Design for Environment	x
1995	van Weenen	EU	Towards sustainable product development	Journal Publication	Journal of Cleaner Production	Compare different concepts / definitions / terminology	The western world has for many years been characterized by an enormous throughput of resources and energy. It represents 20% of the world population and uses 80% of the material and energy resources annually extracted and exploited. [...] Vast amounts of natural resources have been taken from sources in the developing world. Much of the environmental impact along the life cycle of a product is lo…	x		Imbalance between developed and developing countries in resource consumption and burden of pollution		x				Sustainable Product Development	x
1995	van Weenen	EU	Towards sustainable product development	Journal Publication	Journal of Cleaner Production	Compare different concepts / definitions / terminology	The environmental properties of resources should be of decisive importance in the determination of a resource use policy, which takes account of the specific product requirements as well as the environmental product life cycle implications. It may be essential to initiate preparatory materials policies and sustainable product development processes on the basis of an analysis of a virtual scarcity…		x	resource policies should be based on scarcity and other, conflicting demands			x			Sustainable Product Development	x
1995	van Weenen	EU	Towards sustainable product development	Journal Publication	Journal of Cleaner Production	Compare different concepts / definitions / terminology	Central considerations in these policies will be, on the one hand, present and future availability and, on the other hand, elementary needs and the number of people that could benefit from the resources.		x	policies need to take into account fair distribution of resources			x			Sustainable Product Development	x
1995	van Weenen	EU	Towards sustainable product development	Journal Publication	Journal of Cleaner Production	Compare different concepts / definitions / terminology	In combination with resource use selectivity, it is important to utilize resources, substances, materials, product components, products and product systems to their fullest potential.		x	necessity to utilize resources to their fullest potential			x			Sustainable Product Development	x
1995	van Weenen	EU	Towards sustainable product development	Journal Publication	Journal of Cleaner Production	Compare different concepts / definitions / terminology	Also, a diversity of chemical substances should be used which is compatible with nature and not exotic or in opposition to it. Sound raw materials policies would favour renewable resources over non-renewable, abundant resources over those that are scarce, and less polluting over clearly polluting resources.		x	raw material policies need to promote non-toxic, renewable, abundant and non-polluting substances			x			Sustainable Product Development	x
1995	van Weenen	EU	Towards sustainable product development	Journal Publication	Journal of Cleaner Production	Compare different concepts / definitions / terminology	In product development more emphasis will be put on questions regarding actual needs and wants, required functions and new creative and environment orientated ways of meeting acknowledged and respected demands.		x	product development needs to focus on actual needs and wants			x			Sustainable Product Development	x
1996	Dewberry	EU	Ecodesign	Doctoral Thesis	The Open University	Thesis: provide a literature review and introduce a new concept / framework / method	A number of ecodesign approaches and strategies have been reviewed and it is clear that the subject area is in it’s early stages of evolution.	x		ecodesign is in its early stage of evolution		x				Ecodesign	x
1996	Dewberry	EU	Ecodesign	Doctoral Thesis	The Open University	Thesis: provide a literature review and introduce a new concept / framework / method	Theories have been developed but few have been translated into practical guidelines to be included within environmental management guidelines.	x		ecodesign theories have largely not found their way into practical guidelines		x	x	x		Ecodesign	x
1996	Dewberry	EU	Ecodesign	Doctoral Thesis	The Open University	Thesis: provide a literature review and introduce a new concept / framework / method	There are opportunities for studies to be made on ‘the state-of -the -art’ present day ecodesign philosophies and practices in industry; the opportunities and barriers for ecodesign.		x	researchers should study ecodesign philosophy, -practice, -barriers and -opportunities		x	x			Ecodesign	x
1996	Dewberry	EU	Ecodesign	Doctoral Thesis	The Open University	Thesis: provide a literature review and introduce a new concept / framework / method	There is a need for a design perspective as opposed to a management perspective in looking at the rate of success of ecodesign strategies		x	the ecodesign success rate should be judged from a design perspective			x			Ecodesign	x
1997	Bras	NAR	Incorporating Environmental Issues in Product Design and Realization	Journal Publication	Industry and Environment	Compare different concepts / definitions / terminology	Clearly, a wide variety of approaches for reducing the environmental impact exists […] as well as supporting tools […].	x		large number of ecodesign concepts and tools exist				x		-	x
1997	Bras	NAR	Incorporating Environmental Issues in Product Design and Realization	Journal Publication	Industry and Environment	Compare different concepts / definitions / terminology	It is imperative that a company recognizes its current state and capabilities, as well as its motivation and target level for integrating environmental issues in product design and realization.		x	companies need to self-assess current state, capabilities, motivation and target level			x			-	x
1997	Bras	NAR	Incorporating Environmental Issues in Product Design and Realization	Journal Publication	Industry and Environment	Compare different concepts / definitions / terminology	Furthermore, a unilateral decision may have deep consequences in today’s highly integrated product realization practices.	x		unilateral decisions in a complex product chain may have unforeseen consequences			x			-	x
1997	Bras	NAR	Incorporating Environmental Issues in Product Design and Realization	Journal Publication	Industry and Environment	Compare different concepts / definitions / terminology	On the negative side, small to medium size companies with domestic markets worry often only about satisfying local, state, and federal [...] regulations (if at all). Many small companies [...] have no clue about pollution prevention, let alone about DFE [design for environment], industrial ecology, or even sustainable development [...] we are seeing a domino effect due to the fact that large Orig…	x		small and medium sized enterprizes (SME) are largely uninformed with respect to pollution prevention and ecodesign		x	x			-	x
1997	Bras	NAR	Incorporating Environmental Issues in Product Design and Realization	Journal Publication	Industry and Environment	Compare different concepts / definitions / terminology	In the near future, ISO 14000 may cause an even deeper ripple effect, augmented by increased awareness through education.		x	norms and standards can influence industrial practice			x	x		-	x
1997	Bras	NAR	Incorporating Environmental Issues in Product Design and Realization	Journal Publication	Industry and Environment	Compare different concepts / definitions / terminology	The challenge lies in the seamless implementation in existing and new practices.	x		new and exisiting practices need to integrate seamlessly			x	x		-	x
1997	Lenox, Ehrenfeld	NAR	Organizing for Effective Environmental Cooperation	Journal Publication	Business Strategy and the Environment	Identify barriers / requirements / success factors for successful ecodesign implementation	Furhermore, to the extent that environmental design capability is tacit and embedded in hard to imitate organizational routines, such advantages may be sustainable.	x		environmental design capabilities are sustainable when incorporated into routines			x			-	x
1997	Lenox, Ehrenfeld	NAR	Organizing for Effective Environmental Cooperation	Journal Publication	Business Strategy and the Environment	Identify barriers / requirements / success factors for successful ecodesign implementation	Yet firms are struggling to build their environmental design capability. Design for Environment is a diverse set of concepts, practices, and tools. Currently, there is no widely accepted approach to building environmental design capability.	x		no widely accepted concept of ecodesign available	x	x				-	x
1997	Lenox, Ehrenfeld	NAR	Organizing for Effective Environmental Cooperation	Journal Publication	Business Strategy and the Environment	Identify barriers / requirements / success factors for successful ecodesign implementation	Case studies indicate that environmental design capability may be greatest in forms which build a variety of support functions on the corporate level while coordinating them with product development teams through training and extensive use of gatekeepers.	x		management support and training improve ecodesign capabilities			x		x	-	x
1997	Lenox, Ehrenfeld	NAR	Organizing for Effective Environmental Cooperation	Journal Publication	Business Strategy and the Environment	Identify barriers / requirements / success factors for successful ecodesign implementation	Our studies suggest that current research into environmental design has placed too much emphasis on the development of environmental design tools […]. All too often, these design tools fail to to consider the context in which they are to be embedded and consequently never see adoption.	x		large number of tools already exist				x		-	x
1997	Lenox, Ehrenfeld	NAR	Organizing for Effective Environmental Cooperation	Journal Publication	Business Strategy and the Environment	Identify barriers / requirements / success factors for successful ecodesign implementation	More disturbing has been an emphasis on some firms to develop tools at the expense of building other perhaps more robust knowledge resources.	x		companies currently develop tools at the expense of more effective measures			x	x		-	x
1997	Zhang, Kuo, Lu, Huang	NAR	Environmentally conscious design and manufacturing: A state-of-the-art survey	Journal Publication	Journal of Manufacturing Systems	Provide a general / historical overview of the field	ECD&M [environmentally conscious design & manufacturing] is a long-term goal that will require changes in management systems and cost models (economic, financial, and accounting).		x	changes in management systems and cost models needed			x		x	Environmentally Conscious Design & Manufacturing	x
1997	Zhang, Kuo, Lu, Huang	NAR	Environmentally conscious design and manufacturing: A state-of-the-art survey	Journal Publication	Journal of Manufacturing Systems	Provide a general / historical overview of the field	To achieve this goal, controlling and monitoring of operations must be increased to better comprehend environmental costs. […] Monitoring and controls must be increased when critical materials and processes are being used. Process monitoring and engineering control can automatically obtain and report information on chemical usage, process, quality, and emission levels.		x	increased and improved controlling and monitoring of operations needed			x			Environmentally Conscious Design & Manufacturing	x
1997	Zhang, Kuo, Lu, Huang	NAR	Environmentally conscious design and manufacturing: A state-of-the-art survey	Journal Publication	Journal of Manufacturing Systems	Provide a general / historical overview of the field	A better accounting system must be developed to track environmental cost and encourage investment in environmental projects (such as process modification, treatment, and recycling).		x	better accounting system needed for tracking environmental cost			x		x	Environmentally Conscious Design & Manufacturing	x
1997	Zhang, Kuo, Lu, Huang	NAR	Environmentally conscious design and manufacturing: A state-of-the-art survey	Journal Publication	Journal of Manufacturing Systems	Provide a general / historical overview of the field	Manufacturing processes, treatment technologies, and methods of disposal must be continuously analyzed. […] A material reclamation process centered on recyclability, minimal residues, and more efficient disposal and waste management must be developed.		x	manufacturing and material reclamation processes need to be optimized			x			Environmentally Conscious Design & Manufacturing	x
1997	Zhang, Kuo, Lu, Huang	NAR	Environmentally conscious design and manufacturing: A state-of-the-art survey	Journal Publication	Journal of Manufacturing Systems	Provide a general / historical overview of the field	Material and manufacturing processes databases are necessary to aid designers in evaluating a product's environmental impact. Material databases (that is, material properties) should consist of both virgin material and recovered ones. Furthermore, the database should also indicate the compatibility and limitation of different materials. Processes databases should consist of the environmental impa…		x	a material and process database could aid designers engaging in ecodesign			x			Environmentally Conscious Design & Manufacturing	x
1997	Zhang, Kuo, Lu, Huang	NAR	Environmentally conscious design and manufacturing: A state-of-the-art survey	Journal Publication	Journal of Manufacturing Systems	Provide a general / historical overview of the field	The level of public perception of risk, technology, and the environment also needs to be increased.		x	increased public awareness of environmental concerns is necessary			x			Environmentally Conscious Design & Manufacturing	x
1997	Zhang, Kuo, Lu, Huang	NAR	Environmentally conscious design and manufacturing: A state-of-the-art survey	Journal Publication	Journal of Manufacturing Systems	Provide a general / historical overview of the field	The government needs to set up certain regulations to protect the environment (such as for process and product emissions).		x	environmental regulation is necessary			x			Environmentally Conscious Design & Manufacturing	x
1997	Zhang, Kuo, Lu, Huang	NAR	Environmentally conscious design and manufacturing: A state-of-the-art survey	Journal Publication	Journal of Manufacturing Systems	Provide a general / historical overview of the field	All environmental consequences of a product or a process from initial design to development phases need to be understood and analyzed. […] Equipment design must address waste and emission management as well as disposition.		x	complete life cycle impact needs to be assessed			x	x		Environmentally Conscious Design & Manufacturing	x
1997	Zhang, Kuo, Lu, Huang	NAR	Environmentally conscious design and manufacturing: A state-of-the-art survey	Journal Publication	Journal of Manufacturing Systems	Provide a general / historical overview of the field	ECD&M [environmentally conscious design & manufacturing] involves a paradigm shift, going from end-of-pipe control to meet environmental regulations to the situation of avoiding pollution in the first place.		x	paradigm shift needed from end-of-pipe control to avoiding pollution	x	x	x			Environmentally Conscious Design & Manufacturing	x
1999	Lofthouse, Bhamra, Evans	EU	Effective Ecodesign: Finding a Way Forward for Industry	Conference Proceeding	6th International Product Development Management Conference	Provide a general / historical overview of the field	[...] by not using the skills of industrial designers as a complimentary strategy to the ‘redesign methods’ of design engineering, businesses are missing much of the commercial potential to be gained from ecodesign. This is happening because the correct ‘tools’ and ‘processes’ to achieve this have not yet been recognised and developed. It is important that work is carried out to determine how to …		x	industrial designers are not sufficiently involved in ecodesign			x		x	Ecodesign	x
2000	Ritzén	EU	Integrating Environmental Aspects into Product Development - Proactive Measures	Doctoral Thesis	Royal Institute of Technology, Stockholm	Thesis: provide a literature review and introduce a new concept / framework / method	Management ought to set direction with a comprehensive view on business development and physical flows in the business. […] A comprehensive approach to both business development and material and energy flows is crucial for the environmental adaptation of products to take place.		x	mapping of resource flows within an organization benefits ecodesign implementation			x	x		-	x
2000	Ritzén	EU	Integrating Environmental Aspects into Product Development - Proactive Measures	Doctoral Thesis	Royal Institute of Technology, Stockholm	Thesis: provide a literature review and introduce a new concept / framework / method	Knowledge and skills need to be developed with an action learning approach. [...] Knowledge sources for information and knowledge transfer must be clear to product developers.		x	knowledge and skills need to be developed actively within an organization			x			-	x
2000	Ritzén	EU	Integrating Environmental Aspects into Product Development - Proactive Measures	Doctoral Thesis	Royal Institute of Technology, Stockholm	Thesis: provide a literature review and introduce a new concept / framework / method	A product life-cycle approach must be applied in product development.		x	product development needs to take a life-cycle-approach			x			-	x
2000	Ritzén	EU	Integrating Environmental Aspects into Product Development - Proactive Measures	Doctoral Thesis	Royal Institute of Technology, Stockholm	Thesis: provide a literature review and introduce a new concept / framework / method	Product developers must handle new priorities and consider trade-offs between different aspects […]		x	product developers need to consider trade-offs			x			-	x
2000	Ritzén	EU	Integrating Environmental Aspects into Product Development - Proactive Measures	Doctoral Thesis	Royal Institute of Technology, Stockholm	Thesis: provide a literature review and introduce a new concept / framework / method	Set the direction: It is management’s responsibility to set the direction and magnitude of alterations in product development and to communicate this at all levels within the organisation. Consistent management behaviour is required, which includes goal setting, [...] resource allocation, [and] follow-up [...]		x	for ecodesign implementation, management needs to set goals, follow-up on them and allocate resources			x		x	-	x
2000	Ritzén	EU	Integrating Environmental Aspects into Product Development - Proactive Measures	Doctoral Thesis	Royal Institute of Technology, Stockholm	Thesis: provide a literature review and introduce a new concept / framework / method	Create individual commitment: People affected by the changes performed in order to integrate environmental aspects ought to be included in the work on change. [...] Regarding environmental issues, environmental champions can be identified, i.e. people personally committed to the issues.		x	individual commitment within an organization can help ("environmental champions")			x			-	x
2000	Ritzén	EU	Integrating Environmental Aspects into Product Development - Proactive Measures	Doctoral Thesis	Royal Institute of Technology, Stockholm	Thesis: provide a literature review and introduce a new concept / framework / method	Adjust work procedures: Environmental issues ought to be included in formal processes, and impact analysis ought to be incorporated into basic data for decision-making. Environmental demands should be formulated and environmental issues should be clarified at review gates, presupposing that priority is given. During a transition phase, explicit gate phase planning could be beneficial and may also…		x	organizational and operational changes required for ecodesign implementation			x			-	x
2000	Ritzén	EU	Integrating Environmental Aspects into Product Development - Proactive Measures	Doctoral Thesis	Royal Institute of Technology, Stockholm	Thesis: provide a literature review and introduce a new concept / framework / method	Apply support tools: Support tools are an advantage, assuming certain properties are assured and implementation of them is carefully considered (using implementation framework and implementation keys for guidance). Use of resources has to be placed in relation to the benefit of the tool. The level of usage and users also has to be considered; a high level of usage and routine use in product devel…		x	tools can be supportive in implementing ecodesign			x	x		-	x
2000	Ritzén	EU	Integrating Environmental Aspects into Product Development - Proactive Measures	Doctoral Thesis	Royal Institute of Technology, Stockholm	Thesis: provide a literature review and introduce a new concept / framework / method	A lack of empirical data is recognised in management actions, which indicates that research is needed on how practically to anchor changes required at all levels in an organisation. Another important issue in this respect is how to improve communication of goals and improve feedback from management to product developers.		x	more research is needed on change management for ecodesign in organizations			x		x	-	x
2000	Ritzén	EU	Integrating Environmental Aspects into Product Development - Proactive Measures	Doctoral Thesis	Royal Institute of Technology, Stockholm	Thesis: provide a literature review and introduce a new concept / framework / method	If a second-order change in industrial product development is to be performed, individual behaviour must be investigated further within the frames of environmental adaptation of products. Interaction between personal responsibility, societal development and company activities is an important issue in relation to behaviour on the job.		x	individual behavioral change needed to reach sustainability			x			-	x
2000	Ritzén	EU	Integrating Environmental Aspects into Product Development - Proactive Measures	Doctoral Thesis	Royal Institute of Technology, Stockholm	Thesis: provide a literature review and introduce a new concept / framework / method	The development of skills in environmental issues is identified as a proactive measure. Further investigations into how to embody “environmental learning” in organisational learning could be part of research aimed at increasing industrial competition.		x	investigate how to foster "environmental learning"			x			-	x
2000	Ritzén	EU	Integrating Environmental Aspects into Product Development - Proactive Measures	Doctoral Thesis	Royal Institute of Technology, Stockholm	Thesis: provide a literature review and introduce a new concept / framework / method	Support tools are aids to performing product development and integrating new aspects. How flexibly to apply different environmental support tools should be further investigated in the context of efficient implementation of support tools.		x	investigate how to efficiently implement ecodesign tools				x		-	x
2000	Roy	EU	Sustainable Product-Service Systems	Journal Publication	Futures	Provide a general / historical overview of the field	It is clear that many radical ideas are emerging in response to the enormous challenge posed by the likely need to reduce environmental burden and resource use in the industrialised world to between 25 and 5% of current levels for each unit of service rendered.	x		factor 4 to factor 20 reduction in environmental impact is required to reach sustainability			x			Product Service Systems	x
2000	Roy	EU	Sustainable Product-Service Systems	Journal Publication	Futures	Provide a general / historical overview of the field	Some of these [more sustainable] systems, such as public libraries and bus services, are similar to what exists now, but can be greatly improved, especially through the use of advanced information and communication technologies.		x	information- and communication technology (ICT) might be an enabler for product service systems (PSS)			x		x	Product Service Systems	x
2000	Roy	EU	Sustainable Product-Service Systems	Journal Publication	Futures	Provide a general / historical overview of the field	Yet other ideas include transferring certain potentially more sustainable ways of providing goods and services from the developing world to the industrialised North, such as the use of rickshaws and shared taxis for local transport.		x	developed countries might benefit from solutions from developing countries		x	x			Product Service Systems	x
2000	Roy	EU	Sustainable Product-Service Systems	Journal Publication	Futures	Provide a general / historical overview of the field	Although sharing products may save resources, sharing is not necessarily acceptable to users. For example, one of the main reasons why the car sharers mentioned earlier reduced their car use was because they had less convenient access to a vehicle. At present, leasing products is usually more expensive than buying, which is likely to deter many people from adopting this option, despite the benefi…	x		product service systems (PSS) might come with downsides that deter consumers from using them			x			Product Service Systems	x
2000	Roy	EU	Sustainable Product-Service Systems	Journal Publication	Futures	Provide a general / historical overview of the field	It is therefore necessary to stress the social, environmental and other benefits of these new ecodesigns and product-service systems when designing and marketing them.		x	benefits of product service systems (PSS) need to be emphasized on			x			Product Service Systems	x
2000	Roy	EU	Sustainable Product-Service Systems	Journal Publication	Futures	Provide a general / historical overview of the field	It is also usually necessary to devise market incentives, regulations and other measures to make them viable, for example providing tax incentives to conserve fuel or to switch to renewable energy.		x	regulation and market incentives required as enablers for product service systems (PSS)			x			Product Service Systems	x
2000	Roy	EU	Sustainable Product-Service Systems	Journal Publication	Futures	Provide a general / historical overview of the field	Innovative design and the latest technologies can also be employed to make new services, such as shared transport, more user-friendly and convenient.		x	design can help make product service systems (PSS) more user-friendly			x			Product Service Systems	x
2000	Roy	EU	Sustainable Product-Service Systems	Journal Publication	Futures	Provide a general / historical overview of the field	Designing goods and services that reduce environmental impacts […] will require the highest levels of creativity, the use of both traditional and advanced technologies, and the collaboration of many diverse organisations.		x	interdisciplinary cooperation among organizations needed			x			Product Service Systems	x
2000	Sherwin	EU	Innovative ecodesign: an exploratory and descriptive study of industrial design practice	Doctoral Thesis	Cranfield University	Thesis: provide a literature review and introduce a new concept / framework / method	Ecodesign literature tends to describe these innovations as either/or polarities of 'innovative' or 'incremental'. The more radical approach is more likely to achieve sustainability, but is little understood or practised, with most ecodesign being of the more incremental nature. Current tools and methods are insufficient for the innovative approach or for sustainability.	x		more radical approaches are little understood and practiced			x	x		Ecodesign	x
2000	Sherwin	EU	Innovative ecodesign: an exploratory and descriptive study of industrial design practice	Doctoral Thesis	Cranfield University	Thesis: provide a literature review and introduce a new concept / framework / method	The early stages of product development (pre-specification, product planning, concept design or strategic design) are recognised as of critical importance to these more radical environmental improvements and innovations. This implicates design and especially Industrial Design as the 'early stage' designers. However there is a shortage of work and tools and working practices or research at these e…	x		the early stages of product development are of crucial importance for reducing a product's environmental impact			x			Ecodesign	x
2000	Sherwin	EU	Innovative ecodesign: an exploratory and descriptive study of industrial design practice	Doctoral Thesis	Cranfield University	Thesis: provide a literature review and introduce a new concept / framework / method	Industrial Design has some responsibility for the generation of (new) product concepts, as well as their development and detail. However, though designers offer great potential for strategic and creative input, they are rarely involved in the more strategic and 'early stage' decision-making so important to more innovative ecodesign. They are mostly employed in more operational contexts.	x		industrial designers are not sufficiently involved in ecodesign			x		x	Ecodesign	x
2001	Stevels	EU	Application of EcoDesign: ten years of dynamic development	Conference Proceeding	2nd International Symposium on Environmentally Conscious Design and Inverse Manufacturing	Provide a general / historical overview of the field	Eco-design will have to take a multitude of aspects into account but can also be a forceful driver for rejuvenation of engineering, company and business practices, for change of consumer behaviour and even for a different governance model in our society.		x	ecodesign should engage in cross-learning with other disciplines and departments			x		x	Ecodesign	x
2001	Stevels	EU	Application of EcoDesign: ten years of dynamic development	Conference Proceeding	2nd International Symposium on Environmentally Conscious Design and Inverse Manufacturing	Provide a general / historical overview of the field	[…] only awareness about Ecodesign on level 1 and 2 [incremental improvements] is well addressed. Awareness at level 3, 4 [paradigm shifts] should be addressed as well.		x	more radical approaches are little understood and practiced			x			Ecodesign	x
2001	Stevels	EU	Application of EcoDesign: ten years of dynamic development	Conference Proceeding	2nd International Symposium on Environmentally Conscious Design and Inverse Manufacturing	Provide a general / historical overview of the field	[it should be more emphasized on the fact that] green marketing and sales are an integral part of Eco-design […]		x	marketing and sales aspects are neglected			x		x	Ecodesign	x
2001	Stevels	EU	Application of EcoDesign: ten years of dynamic development	Conference Proceeding	2nd International Symposium on Environmentally Conscious Design and Inverse Manufacturing	Provide a general / historical overview of the field	The supplier aspects ("chain management") score insufficient in terms of awareness, whereas it is not realized at all that Ecodesign can be an important issue when combined with quality.		x	supply chains should be involved in ecodesign			x		x	Ecodesign	x
2001	Stevels	EU	Application of EcoDesign: ten years of dynamic development	Conference Proceeding	2nd International Symposium on Environmentally Conscious Design and Inverse Manufacturing	Provide a general / historical overview of the field	organization of processes/engineering, company/business perspective and societal perspective got off the ground but still have to be developed much further.		x	involvement beyond the product development department is lacking in general			x		x	Ecodesign	x
2001	Stevels	EU	Application of EcoDesign: ten years of dynamic development	Conference Proceeding	2nd International Symposium on Environmentally Conscious Design and Inverse Manufacturing	Provide a general / historical overview of the field	In its real infancy are still supplier integration, and consumer perspective.	x		the consumer perspective is neglected			x			Ecodesign	x
2002	Baumann, Boons, Bragd	EU	Mapping the green product development field: engineering, policy and business perspectives	Journal Publication	Journal of Cleaner Production	Provide a general / historical overview of the field	Too many normative suggestions, with little practical relevance or testing: empirical material is presented, but often as an illustration rather than as a testing ground for the hypotheses.	x		there are too many normative suggestions without practical relevance			x	x		Green Product Development	x
2002	Baumann, Boons, Bragd	EU	Mapping the green product development field: engineering, policy and business perspectives	Journal Publication	Journal of Cleaner Production	Provide a general / historical overview of the field	Too much tool development: references indicate that those involved in the field are more interested in developing a new tool than on studying the use of existing ones and to evaluate them in order to improve them.	x		there is too much tool development				x		Green Product Development	x
2002	Baumann, Boons, Bragd	EU	Mapping the green product development field: engineering, policy and business perspectives	Journal Publication	Journal of Cleaner Production	Provide a general / historical overview of the field	Too little linkage between strategic intent and content: top-down approaches to environmental issues (with policies, etc) and bottom-up approaches (daily activities) do not really meet in businesses.	x		there is a missing link between top-down and bottom-up approaches			x			Green Product Development	x
2002	Baumann, Boons, Bragd	EU	Mapping the green product development field: engineering, policy and business perspectives	Journal Publication	Journal of Cleaner Production	Provide a general / historical overview of the field	Too little about the larger context of product development: the process of product development within the company is seldom linked to other processes inside the company, nor to processes outside the company.	x		there is too little research on the context of product development within an organization			x			Green Product Development	x
2002	Baumann, Boons, Bragd	EU	Mapping the green product development field: engineering, policy and business perspectives	Journal Publication	Journal of Cleaner Production	Provide a general / historical overview of the field	Too little recognition of system’s perspectives in policy making: the references on public policy deal mainly with individual policy instruments, rather than taking a holistic perspective of the actor network or the material flows.	x		a system's perspective in policy-making is lacking			x			Green Product Development	x
2002	Baumann, Boons, Bragd	EU	Mapping the green product development field: engineering, policy and business perspectives	Journal Publication	Journal of Cleaner Production	Provide a general / historical overview of the field	[…] there is a need for a greater exchange between the different perspectives [engineering, business, policy]		x	more exchange between engineering, business and policy research needed			x		x	Green Product Development	x
2002	Baumann, Boons, Bragd	EU	Mapping the green product development field: engineering, policy and business perspectives	Journal Publication	Journal of Cleaner Production	Provide a general / historical overview of the field	A problem is that ‘representatives’ acting on behalf of the flows of material resources, or of the product chains, does not currently exist.	x		there is a lack of representatives for material flows and product chains			x			Green Product Development	x
2002	Baumann, Boons, Bragd	EU	Mapping the green product development field: engineering, policy and business perspectives	Journal Publication	Journal of Cleaner Production	Provide a general / historical overview of the field	[…] a driver to minimise environmental impact on a product system level is missing too, since this lies beyond the area of responsibility of individual companies and since representatives on the product system level are non-existing.	x		there is a lack of producer responsibility for environmental impact outside of production and recycling (e.g. use)			x			Green Product Development	x
2002	Johansson	EU	Success factors for integration of ecodesign in product development: A review of state of the art	Journal Publication	Environmental Management and Health	Identify barriers / requirements / success factors for successful ecodesign implementation	[provide] commitment and support (management).	x		for successful ecodesign implementation, provide management commitment and support			x			Ecodesign	x
2002	Johansson	EU	Success factors for integration of ecodesign in product development: A review of state of the art	Journal Publication	Environmental Management and Health	Identify barriers / requirements / success factors for successful ecodesign implementation	[establish] clear environmental goals (management).	x		for successful ecodesign implementation, establish clear environmental goals			x			Ecodesign	x
2002	Johansson	EU	Success factors for integration of ecodesign in product development: A review of state of the art	Journal Publication	Environmental Management and Health	Identify barriers / requirements / success factors for successful ecodesign implementation	[…] environmental considerations are addressed as business issues (management).	x		for successful ecodesign implementation, environmental issues are seen as business issues			x			Ecodesign	x
2002	Johansson	EU	Success factors for integration of ecodesign in product development: A review of state of the art	Journal Publication	Environmental Management and Health	Identify barriers / requirements / success factors for successful ecodesign implementation	[…] not only the operational dimension of ecodesign [is] considered, but also the strategic dimension (management).	x		for successful ecodesign implementation, take into account also the strategic dimension of ecodesign			x			Ecodesign	x
2002	Johansson	EU	Success factors for integration of ecodesign in product development: A review of state of the art	Journal Publication	Environmental Management and Health	Identify barriers / requirements / success factors for successful ecodesign implementation	[…] environmental issues are included when developing a company's technology strategy (management).	x		for successful ecodesign implementation, environmental issues are included in a company's strategy			x			Ecodesign	x
2002	Johansson	EU	Success factors for integration of ecodesign in product development: A review of state of the art	Journal Publication	Environmental Management and Health	Identify barriers / requirements / success factors for successful ecodesign implementation	[…] a strong customer focus is adopted (customer relationships).	x		for successful ecodesign implementation, adopt a strong customer focus			x			Ecodesign	x
2002	Johansson	EU	Success factors for integration of ecodesign in product development: A review of state of the art	Journal Publication	Environmental Management and Health	Identify barriers / requirements / success factors for successful ecodesign implementation	[…] companies train their customers in environmental issues (customer relationships).	x		for successful ecodesign implementation, companies train their customers in environmental issues			x			Ecodesign	x
2002	Johansson	EU	Success factors for integration of ecodesign in product development: A review of state of the art	Journal Publication	Environmental Management and Health	Identify barriers / requirements / success factors for successful ecodesign implementation	[…] close supplier relationships are established (supplier relationships).	x		for successful ecodesign implementation, establish close supplier relationships			x			Ecodesign	x
2002	Johansson	EU	Success factors for integration of ecodesign in product development: A review of state of the art	Journal Publication	Environmental Management and Health	Identify barriers / requirements / success factors for successful ecodesign implementation	[…] environmental issues are considered at the very beginning of the product development process (development process).	x		for successful ecodesign implementation, implement environmental issues early in the product development process			x			Ecodesign	x
2002	Johansson	EU	Success factors for integration of ecodesign in product development: A review of state of the art	Journal Publication	Environmental Management and Health	Identify barriers / requirements / success factors for successful ecodesign implementation	[…] environmental issues are integrated into the conventional product development process (development process).	x		for successful ecodesign implementation, integrate ecodesign into the conventional product development process			x			Ecodesign	x
2002	Johansson	EU	Success factors for integration of ecodesign in product development: A review of state of the art	Journal Publication	Environmental Management and Health	Identify barriers / requirements / success factors for successful ecodesign implementation	[…] environmental checkpoints, reviews and milestone questions are introduced into the product development process (development process).	x		for successful ecodesign implementation, introduce environmental checkpoints, reviews and milestones into the product development process			x			Ecodesign	x
2002	Johansson	EU	Success factors for integration of ecodesign in product development: A review of state of the art	Journal Publication	Environmental Management and Health	Identify barriers / requirements / success factors for successful ecodesign implementation	[…] company-specific environmental design principles, rules and standards are used (development process).	x		for successful ecodesign implementation, use company specific design principles, rules and standards			x			Ecodesign	x
2002	Johansson	EU	Success factors for integration of ecodesign in product development: A review of state of the art	Journal Publication	Environmental Management and Health	Identify barriers / requirements / success factors for successful ecodesign implementation	[…] ecodesign is performed in cross-functional teams (development process).	x		for successful ecodesign implementation, engage in ecodesign in cross-functional teams			x			Ecodesign	x
2002	Johansson	EU	Success factors for integration of ecodesign in product development: A review of state of the art	Journal Publication	Environmental Management and Health	Identify barriers / requirements / success factors for successful ecodesign implementation	[…] ecodesign support tools are used (development process).	x		for successful ecodesign implementation, use ecodesign tools				x		Ecodesign	x
2002	Johansson	EU	Success factors for integration of ecodesign in product development: A review of state of the art	Journal Publication	Environmental Management and Health	Identify barriers / requirements / success factors for successful ecodesign implementation	[…] education and training are provided to the product development personnel (competence).	x		for successful ecodesign implementation, provide education and training to the product developers			x			Ecodesign	x
2002	Johansson	EU	Success factors for integration of ecodesign in product development: A review of state of the art	Journal Publication	Environmental Management and Health	Identify barriers / requirements / success factors for successful ecodesign implementation	[…] an environmental specialist supports the development activities (competence).	x		for successful ecodesign implementation, introduce an environmental specialist to support development activities			x			Ecodesign	x
2002	Johansson	EU	Success factors for integration of ecodesign in product development: A review of state of the art	Journal Publication	Environmental Management and Health	Identify barriers / requirements / success factors for successful ecodesign implementation	[…] examples of good design solutions are utilised (competence).	x		for successful ecodesign implementation, utilize examples of good design			x			Ecodesign	x
2002	Johansson	EU	Success factors for integration of ecodesign in product development: A review of state of the art	Journal Publication	Environmental Management and Health	Identify barriers / requirements / success factors for successful ecodesign implementation	[…] a new mindset emphasising the importance of the environmental considerations is established (motivation).	x		for successful ecodesign implementation, establish a new mindset emphasising on the importance of environmental issues			x			Ecodesign	x
2002	Johansson	EU	Success factors for integration of ecodesign in product development: A review of state of the art	Journal Publication	Environmental Management and Health	Identify barriers / requirements / success factors for successful ecodesign implementation	[…] an environmental champion exists (motivation).	x		for successful ecodesign implementation, introduce an environmental champion			x			Ecodesign	x
2002	Johansson	EU	Success factors for integration of ecodesign in product development: A review of state of the art	Journal Publication	Environmental Management and Health	Identify barriers / requirements / success factors for successful ecodesign implementation	[…] individuals are encouraged to take an active part in the integration of ecodesign (motivation).	x		for successful ecodesign implementation, encourage individuals to take an active part in the integration of ecodesign			x			Ecodesign	x
2002	Robèrt, Schmidt-Bleek, Aloisi de Larderel, Basile, Jansen, Kuehr, Price Thomas, Suzuki, Hawken, Wackernagel	EU	Strategic sustainable development - selection, design and synergies of applied tools	Journal Publication	Journal of Cleaner Production	Compare different concepts / definitions / terminology	[...] indicators decided on in creating an EMS [environmental management systems], such as LCA [life cycle assessment], rarely influence final business decisions [...]. This is in spite of the growing intellectual awareness that proactivity is likely to improve bottom line. It is our belief that one reason for this discrepancy is that the systems perspective proposed in this study, and the integr…	x		environmental management systems [EMS] rarely influence business decisions, partly because a systems perpective is lacking			x		x	-	x
2002	Robèrt, Schmidt-Bleek, Aloisi de Larderel, Basile, Jansen, Kuehr, Price Thomas, Suzuki, Hawken, Wackernagel	EU	Strategic sustainable development - selection, design and synergies of applied tools	Journal Publication	Journal of Cleaner Production	Compare different concepts / definitions / terminology	[The developed model has been found to be helpful in] Creating a comprehensive view of sustainable development, so that the neglect of essential elements and underlying principles can be avoided (global perspective on sustainability, ecological and social aspects, dematerialization as well as substitutions—including the cultural level).		x	sustainable development needs a global perspective, consider environmental and social aspects and include both substitutions and dematerialization			x			-	x
2002	Robèrt, Schmidt-Bleek, Aloisi de Larderel, Basile, Jansen, Kuehr, Price Thomas, Suzuki, Hawken, Wackernagel	EU	Strategic sustainable development - selection, design and synergies of applied tools	Journal Publication	Journal of Cleaner Production	Compare different concepts / definitions / terminology	[The developed model has been found to be helpful in] Designing action programs that are strategic from a sustainability perspective and allow a conscious and strategic management of trade offs (based on backcasting from a successful outcome based on underlying principles) […]		x	action programs need strategic management to handle trade-offs and employ backcasting			x			-	x
2002	Robèrt, Schmidt-Bleek, Aloisi de Larderel, Basile, Jansen, Kuehr, Price Thomas, Suzuki, Hawken, Wackernagel	EU	Strategic sustainable development - selection, design and synergies of applied tools	Journal Publication	Journal of Cleaner Production	Compare different concepts / definitions / terminology	[The developed model has been found to be helpful in] Selecting and designing tools that are relevant for the strategic approach (not only monitoring activities that are relevant from the current status of the market, but to avoid “dead ends” in the future).		x	strategic tools are required to avoid "dead ends"			x	x		-	x
2002	Robèrt, Schmidt-Bleek, Aloisi de Larderel, Basile, Jansen, Kuehr, Price Thomas, Suzuki, Hawken, Wackernagel	EU	Strategic sustainable development - selection, design and synergies of applied tools	Journal Publication	Journal of Cleaner Production	Compare different concepts / definitions / terminology	[The developed model has been found to be helpful in] Shaping tax structures, charges, certificates, labeling, subsidies, custom duties and R&D [research & development] priorities that can support approaches toward sustainability […] Planning future export and economic aid policies designed to help avoid the ecological collapse [...]		x	economic measures (e.g. taxes, budgets etc.) need to be taken into account for sustainable development			x			-	x
2002	Robèrt, Schmidt-Bleek, Aloisi de Larderel, Basile, Jansen, Kuehr, Price Thomas, Suzuki, Hawken, Wackernagel	EU	Strategic sustainable development - selection, design and synergies of applied tools	Journal Publication	Journal of Cleaner Production	Compare different concepts / definitions / terminology	[...] there are no major obstacles stemming from the philosophical standpoint or strategic origins of the different various initiatives studied. This creates opportunity for presumptive cooperation. […] since the primary foci are different, perspectives and experiences should be different enough to allow synergies if greater cooperation was established and emphasized [...]		x	various approaches to sustainable development are not mutually exclusive but instead provide synergies			x		x	-	x
2002	Robèrt, Schmidt-Bleek, Aloisi de Larderel, Basile, Jansen, Kuehr, Price Thomas, Suzuki, Hawken, Wackernagel	EU	Strategic sustainable development - selection, design and synergies of applied tools	Journal Publication	Journal of Cleaner Production	Compare different concepts / definitions / terminology	This entails designing how the enterprize will meet human needs —“service orientation”— within the market and in compliance with the system conditions […]		x	companies should focus on human need fulfilment			x			-	x
2002	Robèrt, Schmidt-Bleek, Aloisi de Larderel, Basile, Jansen, Kuehr, Price Thomas, Suzuki, Hawken, Wackernagel	EU	Strategic sustainable development - selection, design and synergies of applied tools	Journal Publication	Journal of Cleaner Production	Compare different concepts / definitions / terminology	[…] and in a way that allows money to flow in even during the early stages of the transition […]		x	cash flow can not be neglected			x			-	x
2002	Robèrt, Schmidt-Bleek, Aloisi de Larderel, Basile, Jansen, Kuehr, Price Thomas, Suzuki, Hawken, Wackernagel	EU	Strategic sustainable development - selection, design and synergies of applied tools	Journal Publication	Journal of Cleaner Production	Compare different concepts / definitions / terminology	[…] these reflections [on the use of harmful substances] were essential to develop business models that can help the developing world to avoid previous mistakes by the industrialized world in this business sector […]		x	developing countries should aim to avoid the previous mistakes of developed world		x	x			-	x
2002	Rounds, Cooper	NAR	Development of product design requirements using taxonomies of environmental issues	Journal Publication	Research in Engineering Design	Introduce a new framework	Classifying environmental issues as environmental concerns or management actions improves the com- prehensiveness, objectivity, validity, and enhancement of understanding and prediction of the taxonomy and the resulting design requirements and engineering characteristics.	x		environmental issues need to be reframed to be taken into account from management			x			-	x
2002	Rounds, Cooper	NAR	Development of product design requirements using taxonomies of environmental issues	Journal Publication	Research in Engineering Design	Introduce a new framework	Classifying environmental issues as environmental concerns or management actions requires a LCA [life cycle assessment] to complete analysis of engineering characteristics.	x		life cycle assessment (LCA) is required for assessment			x	x		-	x
2002	Rounds, Cooper	NAR	Development of product design requirements using taxonomies of environmental issues	Journal Publication	Research in Engineering Design	Introduce a new framework	Regional regulations and infrastructure need to be captured when developing DFE [design for environment] requirements.		x	ecodesign needs to take into account boundary conditions (regulation, infrastructure)			x			-	x
2002	Rounds, Cooper	NAR	Development of product design requirements using taxonomies of environmental issues	Journal Publication	Research in Engineering Design	Introduce a new framework	Classification of environmental issues is time and resource consumptive and would benefit from future work on archiving this information (using database/ Expert systems) to reduce the immediate engineering workload without loss of detail.		x	a central database on environmental information would benefit designers and engineers			x			-	x
2003	Ernzer, Lindahl, Masui, Sakao	EU	An international study on utilization of design for environment methods (DfE) - a pre-study	Conference Proceeding	3rd International Symposium on Environmentally Conscious Design and Inverse Manufacturing	Review methods and tools	The result of this study indicates that companies do not need more methods or tools. Only a few companies stated that they need easier and standardized assessment tools.	x		no new ecodesign methods and tools are required				x		Design for Environment	x
2003	Ernzer, Lindahl, Masui, Sakao	EU	An international study on utilization of design for environment methods (DfE) - a pre-study	Conference Proceeding	3rd International Symposium on Environmentally Conscious Design and Inverse Manufacturing	Review methods and tools	Of course they [the companies] would like to measure environment in terms of money so they can more easily compare it with other costs.		x	environmental concerns need to be connected to financial costs and benefits			x			Design for Environment	x
2003	Ernzer, Lindahl, Masui, Sakao	EU	An international study on utilization of design for environment methods (DfE) - a pre-study	Conference Proceeding	3rd International Symposium on Environmentally Conscious Design and Inverse Manufacturing	Review methods and tools	As long as DfE [design for environment] methods and tools are not utilized more, neither the companies nor the environment will benefit from the development of more DfE methods.		x	utilization of ecodesign methods and tools needs to increase			x	x		Design for Environment	x
2003	Ernzer, Lindahl, Masui, Sakao	EU	An international study on utilization of design for environment methods (DfE) - a pre-study	Conference Proceeding	3rd International Symposium on Environmentally Conscious Design and Inverse Manufacturing	Review methods and tools	in order to go forward in the area of DfE [deisgn for environment] it is necessary to take a step back and investigate the designers’ need and wishes on DfE methods.		x	ecodesign methods and tools should be developed according to the designers' needs			x	x		Design for Environment	x
2003	Heiskanen, Jalas	EU	Radical Eco-Efficiency: Review of the Debate and Evidence	Journal Publication	Corporate Social Responsibility and Environmental Management	Provide a general / historical overview of the field	The idea that new business models (services) can be used to provide desired functions with less natural resource use is, in principle, appealing. Product-based services and result-oriented services combine a functional orientation with an economic logic in which revenues are decoupled from material throughput.	x		product-service-systems can in principle decouple revenue from material throughput	x					-	x
2003	Heiskanen, Jalas	EU	Radical Eco-Efficiency: Review of the Debate and Evidence	Journal Publication	Corporate Social Responsibility and Environmental Management	Provide a general / historical overview of the field	The claims presented for the eco-efficiency of services are based on a limited number of examples, and rather common-sense economic or engineering models. The empirical evidence for these claims is scarce.	x		empirical evidence for the eco-efficiency of product-service-systems (PSS) is scarce			x			-	x
2003	Heiskanen, Jalas	EU	Radical Eco-Efficiency: Review of the Debate and Evidence	Journal Publication	Corporate Social Responsibility and Environmental Management	Provide a general / historical overview of the field	The existing calculations show that the environmental load can be lower in a service model than in a conventional sales model. However, the extent of demonstrated reductions is rarely in the scale of a factor of four or ten, and depends heavily on how the service is designed and operated.	x		radical improvements in eco-efficency from introducing product-service-systems (PSS) are unlikely			x			-	x
2003	Heiskanen, Jalas	EU	Radical Eco-Efficiency: Review of the Debate and Evidence	Journal Publication	Corporate Social Responsibility and Environmental Management	Provide a general / historical overview of the field	There does not seem to be any way to measure the environmental benefits of services in general, and even in specific cases calculations are complex and surrounded by many uncertainties	x		environmental benefits of product-service-systems (PSS) are complex and can not be measured on a general basis			x			-	x
2003	Heiskanen, Jalas	EU	Radical Eco-Efficiency: Review of the Debate and Evidence	Journal Publication	Corporate Social Responsibility and Environmental Management	Provide a general / historical overview of the field	There are also some indications that a service mode of operating changes the economic incentives of manufacturers, but the empirical evidence is scarce.	x		product-service-systems (PSS) might change economic incentives			x			-	x
2003	Heiskanen, Jalas	EU	Radical Eco-Efficiency: Review of the Debate and Evidence	Journal Publication	Corporate Social Responsibility and Environmental Management	Provide a general / historical overview of the field	Many radically more efficient technologies exist, but are not adopted due to political or economic disincentives in the current market structure. Recent studies have indicated that technological improvements within the framework of the existing production structure, cannot deliver factor ten improvements	x		within the current political and economic framework, radical eco-efficiency improvements from new technology cannot be expected			x			-	x
2003	Heiskanen, Jalas	EU	Radical Eco-Efficiency: Review of the Debate and Evidence	Journal Publication	Corporate Social Responsibility and Environmental Management	Provide a general / historical overview of the field	Bleek (1998) has argued (quite convincingly) that the greatest reductions in materials input per ‘service’ (utility) can be achieved at the final stages of the value chain (e.g. in increasing the efficiency of paper use, rather than in increasing the efficiency of paper manufacturing). New services may be one means to focus efficiency improvements toward the final stages of the value chain.		x	the final stages of the value chain allow for the greatest eco-efficiency improvements			x			-	x
2003	Heiskanen, Jalas	EU	Radical Eco-Efficiency: Review of the Debate and Evidence	Journal Publication	Corporate Social Responsibility and Environmental Management	Provide a general / historical overview of the field	Technological efficiency improvements have also, until now, been undermined by a continual increase in consumption.	x		technological efficiency improvements are undermined by an increase in consumption (rebound effect)			x			-	x
2003	Heiskanen, Jalas	EU	Radical Eco-Efficiency: Review of the Debate and Evidence	Journal Publication	Corporate Social Responsibility and Environmental Management	Provide a general / historical overview of the field	[...] the emerging discussion on ‘eco-efficient services’ may be seen as one possible pathway for ecological restructuring on the micro-level. It may be a means to involve companies in considering from an environmental perspective not only how they produce, but what they produce.		x	companies may (and should) question not only how, but what they produce			x			-	x
2003	Heiskanen, Jalas	EU	Radical Eco-Efficiency: Review of the Debate and Evidence	Journal Publication	Corporate Social Responsibility and Environmental Management	Provide a general / historical overview of the field	Rather than developing new ideas for eco-efficient services on the drawing-board, researchers and practitioners might try to find out how existing services could be made more sustainable		x	eco-efficient services should build upon existing services			x			-	x
2003	Heiskanen, Jalas	EU	Radical Eco-Efficiency: Review of the Debate and Evidence	Journal Publication	Corporate Social Responsibility and Environmental Management	Provide a general / historical overview of the field	On the micro-level of individual companies and service offerings, this would imply studying how and why new services are developed, and how and why they are adopted.		x	future research should focus on the development and adoption of services			x			-	x
2003	Heiskanen, Jalas	EU	Radical Eco-Efficiency: Review of the Debate and Evidence	Journal Publication	Corporate Social Responsibility and Environmental Management	Provide a general / historical overview of the field	The examples of eco-efficient services serve not only analytical purposes, but also the rhetorical ones of stimulating and mobilizing key audiences, and introducing a new way of viewing central issues such as value, products, business and utility.		x	secondary effects of eco-efficient services include the propagation of new ideas and values into society			x			-	x
2003	Sun, Han, Ekwaro-Osire, Zhang	NAR	Design for Environment: Methodologies, Tools, and Implementation	Journal Publication	Journal of Integrated Design and Process Science	Provide a general / historical overview of the field	[…] society models, which include technology, government, customers, recyclers, and their interactions are urgently needed to satisfy the requirements of environmental issues.		x	a modeling of society is necessary to fulfil environmental requirements			x	x		Design for Environment	x
2003	Sun, Han, Ekwaro-Osire, Zhang	NAR	Design for Environment: Methodologies, Tools, and Implementation	Journal Publication	Journal of Integrated Design and Process Science	Provide a general / historical overview of the field	[…] current DfE [design for environment] tools should be implemented to compare, refine and develop methods for further use, and innovative tools should be explored for new areas of application.		x	ecodesign methods and tools should be compared, implemented and refined			x	x		Design for Environment	x
2003	Sun, Han, Ekwaro-Osire, Zhang	NAR	Design for Environment: Methodologies, Tools, and Implementation	Journal Publication	Journal of Integrated Design and Process Science	Provide a general / historical overview of the field	Right now, there is an obvious inefficiency of contemporary tools which only concentrate on some special phase of life cycle. The future CAT [computer aided tools] will integrate the analysis and of whole product life cycle, and will possess a function that can handle every section of product's life cycle based on environmental issues.		x	ecodesign methods and tools need to address the complete life cycle			x	x		Design for Environment	x
2003	Sun, Han, Ekwaro-Osire, Zhang	NAR	Design for Environment: Methodologies, Tools, and Implementation	Journal Publication	Journal of Integrated Design and Process Science	Provide a general / historical overview of the field	It is important for the practice of DfE [design for environment] to go beyond the confines of industry into the large society, since a fully successful implementation of DfE is a cooperative effort of both industry and society.		x	ecodesign thinking needs to spread into society			x			Design for Environment	x
2004	Ammenberg, Sundin	EU	Products in environmental management systems: Drivers, barriers and experiences	Journal Publication	Journal of Cleaner Production	Combine two previously unrelated fields or concepts	DFE-[design for environment] thinking could enrich EMS [environmental management systems] by contributing a life-cycle perspective, helping the organisation to identify the most important flows of materials and energy upon which to focus. […] EMS [environmental management systems] may be useful to make DFE [design for environment] efforts become more permanent, i.e. lead to consistent and systema…		x	ecodesign and environmental management systems (EMS) could mutually benefit from one another through integration			x		x	-	x
2004	Ammenberg, Sundin	EU	Products in environmental management systems: Drivers, barriers and experiences	Journal Publication	Journal of Cleaner Production	Combine two previously unrelated fields or concepts	On an organisational level, integration of EMS [environmental management systems] and DFE [design for environment] activities could foster better relations with stakeholders, at least those actively involved in the supply chain. It could also improve internal co-operation among members of different departments.		x	the integration of ecodesign and environmental management systems (EMS) could foster better relations with stakeholders and internal cooperation			x		x	-	x
2004	Ammenberg, Sundin	EU	Products in environmental management systems: Drivers, barriers and experiences	Journal Publication	Journal of Cleaner Production	Combine two previously unrelated fields or concepts	[…] existing studies show that there is a mixed picture concerning to what extent ‘normal’ EMS [environmental management systems] encompass products today […]	x		it is not sure to what extent enviromental management systems (EMS) currently relate to products			x		x	-	x
2004	Ammenberg, Sundin	EU	Products in environmental management systems: Drivers, barriers and experiences	Journal Publication	Journal of Cleaner Production	Combine two previously unrelated fields or concepts	[…] many pollution problems related to specific sites (point sources) have been solved or clearly reduced. Instead, environmental impact caused by the consumer market, e.g. in the form of diffuse emissions, stands out as vital.	x		pollution has moved from point sources (companies) to diffuse sources (customers)		x				-	x
2004	Ammenberg, Sundin	EU	Products in environmental management systems: Drivers, barriers and experiences	Journal Publication	Journal of Cleaner Production	Combine two previously unrelated fields or concepts	[…] from an environmental point of view EMS [environmental management systems] covering a wider scope would be preferable and make EMS a more useful tool when striving for a sustainable development.		x	environmental management systems (EMS) should cover a wider scope			x		x	-	x
2004	Ammenberg, Sundin	EU	Products in environmental management systems: Drivers, barriers and experiences	Journal Publication	Journal of Cleaner Production	Combine two previously unrelated fields or concepts	[...] it seems appropriate to picture the integration as divided into two parts. The first part concerns the integration of environmental aspects into the product development process, while the second part relates to the integration of the product development process into the management system of a company.		x	ecodesign implementation in companies occurs in two stages: environmental concerns into product development, product development into management	x		x		x	-	x
2004	Ammenberg, Sundin	EU	Products in environmental management systems: Drivers, barriers and experiences	Journal Publication	Journal of Cleaner Production	Combine two previously unrelated fields or concepts	For companies developing POEMS [product oriented enviromental management systems], there is a common trend to develop these systems based on the PDCA-[plan-do-check-act] cycle, which facilitates the integration of DFE [design for environment] activities into such frequently used management standards as ISO 9001, ISO 14001 and EMAS [eco-management and audit scheme].	x		existing standards and practices can support the implementation of ecodesign in companies			x		x	-	x
2004	Ammenberg, Sundin	EU	Products in environmental management systems: Drivers, barriers and experiences	Journal Publication	Journal of Cleaner Production	Combine two previously unrelated fields or concepts	To be able to adapt the models to the individual needs of firms, POEMS [product oriented enviromental management systems] models must be flexible. Hence, they normally only include an overall level of the systems, while details have to be addressed in accordance with the conditions for each individual company.		x	ecodesign methods and tools must be flexible to be adapted to the circumstances of an individual company			x	x	x	-	x
2004	Ammenberg, Sundin	EU	Products in environmental management systems: Drivers, barriers and experiences	Journal Publication	Journal of Cleaner Production	Combine two previously unrelated fields or concepts	[…] companies need sufficient drivers to engage with POEMS [product oriented enviromental management systems] and the outcome greatly depends on to what extent environmental problems and challenges can be transformed into business opportunities.		x	companies need drivers to make them engage in ecodesign			x		x	-	x
2004	Ammenberg, Sundin	EU	Products in environmental management systems: Drivers, barriers and experiences	Journal Publication	Journal of Cleaner Production	Combine two previously unrelated fields or concepts	Literature shows that the theoretical potential for integrating EMS [environmental management systems] and DFE [design for environment] concepts in some practical applications has been verified. Thus, without doubt, the marriage of the two concepts can be successful. [...] Very little is written on how POEMS [product oriented enviromental management systems] affect firms’ environmental performanc…	x		the theoretical potential for integrating ecodesign and environmental management systems (EMS) has been verified, the effect on a company's environmental performance needs to be studied further			x		x	-	x
2004	Ammenberg, Sundin	EU	Products in environmental management systems: Drivers, barriers and experiences	Journal Publication	Journal of Cleaner Production	Combine two previously unrelated fields or concepts	Accordingly, efforts to adjust the standard ISO 14001 and the systems for its application would be advantageous from an environmental point of view. External environmental auditors and environmental consultants have important roles in this arena, since they could function both as a driver and a barrier for the integration of standardised EMS [environmental management systems] and DFE [design for …		x	existing norms and standards should be adjusted to include the integration of ecodesign and environmental management systems (EMS)			x		x	-	x
2004	Bhamra	EU	Ecodesign: the search for new strategies in product development	Journal Publication	Proceedings of the Institution of Mechanical Engineers, Part B: Journal of Engineering Manufacture	Provide a general / historical overview of the field	In the future, if organizations are to move beyond ecodesign towards more sustainable products, there will need to be a more revolutionary approach to the way in which products and services are developed.		x	more radical approaches are needed to design truly sustainable products			x			Ecodesign	x
2004	Bhamra	EU	Ecodesign: the search for new strategies in product development	Journal Publication	Proceedings of the Institution of Mechanical Engineers, Part B: Journal of Engineering Manufacture	Provide a general / historical overview of the field	The ‘early stages’ of product development (pre-specification, product planning, concept or strategic design) are recognized as of critical importance to these more radical environmental improvements and innovations.	x		the early stages of product development are of crucial importance for reducing a product's environmental impact			x			Ecodesign	x
2004	Shu-Yang, Freedman, Cote	NAR	Principles and practice of ecological design	Journal Publication	Environmental Reviews	Provide a general / historical overview of the field	To the degree possible, reliance should be placed on renewable sources of these essential resources [food, building material, fuel etc.]		x	reliance should be placed on renewable resources			x			Ecodesign	x
2004	Shu-Yang, Freedman, Cote	NAR	Principles and practice of ecological design	Journal Publication	Environmental Reviews	Provide a general / historical overview of the field	[…] we need to think ecologically, moving from an environmentalism largely driven by sectoral issues involving pollution, resources, and biodiversity, to a more integrated “ecologicalism that recognizes the inherent interdependence of all life systems.”		x	an integrated, systemic approach should foster systems thinking			x			Ecodesign	x
2004	Wigum	EU	Human and ecological problem solving through radical design thinking	Doctoral Thesis	Norwegian University of Science and Technology, Trondheim	Thesis: provide a literature review and introduce a new concept / framework / method	The existing design methodology is lacking the steps between the incremental changes of a reference product to the design of the “big picture” often neither bounded to local sites nor people’s cultural preferences or sustainable evaluation in a holistic long term perspective.	x		design methodology lacks steps between incremental redesign and achieving the "big picture" goals			x	x		Ecodesign	x
2004	Wigum	EU	Human and ecological problem solving through radical design thinking	Doctoral Thesis	Norwegian University of Science and Technology, Trondheim	Thesis: provide a literature review and introduce a new concept / framework / method	The role of the designer and the placement of the design function in a company is also of importance, in order to reach above changes within the existing framework from a product perspective. A design methodology involving other activities in a company might be useful in order to interfere with the strategic decisions in a company or organisation.		x	design methodology needs to include other activities in a company beyond product development			x	x		Ecodesign	x
2005	Hauschild, Jeswiet, Alting	EU	From Life Cycle Assessment to Sustainable Production: Status and Perspectives	Journal Publication	CIRP Annals - Manufacturing Technology	Compare different concepts / definitions / terminology	[…] the improvements in environmental and social performance must be created by the industry who manages the production of material goods in our society today.		x	it is the responsibility of companies to improve the social and environmental performance of products			x			Sustainable Production	x
2005	Hauschild, Jeswiet, Alting	EU	From Life Cycle Assessment to Sustainable Production: Status and Perspectives	Journal Publication	CIRP Annals - Manufacturing Technology	Compare different concepts / definitions / terminology	The environmental impacts do not respect national borders. In developing economies they are often poorly regulated by authorities, and the same holds true for the social impacts. Here is an important role for industries which establish new production sites in developing countries in respecting western standards for environmental protection and treatment of employees and other local stakeholders.		x	companies from western countries should uphold western standards when producing in developing countries		x	x			Sustainable Production	x
2005	Hauschild, Jeswiet, Alting	EU	From Life Cycle Assessment to Sustainable Production: Status and Perspectives	Journal Publication	CIRP Annals - Manufacturing Technology	Compare different concepts / definitions / terminology	The sustainable company must assume responsibility for all three dimensions of sustainability throughout its product chain from the cradle to the grave, and Life Cycle Assessment, Life Cycle Thinking and Design for Environment are central tools in this endeavour.		x	companies striving for sustainability must address all three dimensions of sustainability			x			Sustainable Production	x
2005	Hauschild, Jeswiet, Alting	EU	From Life Cycle Assessment to Sustainable Production: Status and Perspectives	Journal Publication	CIRP Annals - Manufacturing Technology	Compare different concepts / definitions / terminology	Indeed, a number of large corporations have adopted life cycle-oriented management and aim at becoming sustainable.	x		many companies have adopted life cycle oriented management		x	x			Sustainable Production	x
2005	Hauschild, Jeswiet, Alting	EU	From Life Cycle Assessment to Sustainable Production: Status and Perspectives	Journal Publication	CIRP Annals - Manufacturing Technology	Compare different concepts / definitions / terminology	[...] the Danish experience tells that the dissemination of tools which have been developed and adapted, particularly for the SMEs [small and medium sized companies] is slow for most trades, and sometimes completely absent. It is the impression of the authors that, a similar trend can be observed in the rest of the industrialised world. There thus seems to be an insufficient motivation, particula…	x		especially for small and medium sized enterprizes (SME) there seem to be few incentives to implement ecodesign			x			Sustainable Production	x
2005	Hauschild, Jeswiet, Alting	EU	From Life Cycle Assessment to Sustainable Production: Status and Perspectives	Journal Publication	CIRP Annals - Manufacturing Technology	Compare different concepts / definitions / terminology	[...] today, there are only few examples of hard legislation of relevance to the environmental performance of products. The most obvious example in the EU is a directive under development, setting requirements for eco-design of electrical and electronic equipment (EEE) before marketing on the European market [...]. This upcoming directive is the first (hard) legislative requirements on environmen…		x	few examples of hard legislation relating to ecodesign exists			x			Sustainable Production	x
2005	Hauschild, Jeswiet, Alting	EU	From Life Cycle Assessment to Sustainable Production: Status and Perspectives	Journal Publication	CIRP Annals - Manufacturing Technology	Compare different concepts / definitions / terminology	Apart from these examples [of environmental regulation], there is very little hard regulation of the environmental behaviour of products today. If the product is safe, it can thus be manufactured and sold no matter how useless and environmentally inefficient, it may be. The environmental justification of a product is still far from entering into any legal requirements.	x		there is no legislation governing the requirement to justify the existence/necessity of a product			x			Sustainable Production	x
2005	Hauschild, Jeswiet, Alting	EU	From Life Cycle Assessment to Sustainable Production: Status and Perspectives	Journal Publication	CIRP Annals - Manufacturing Technology	Compare different concepts / definitions / terminology	In the absence of efficient sticks in the form of hard legislation, the development of soft regulation in the form of IPP [integrated product policy] […] is trying to present a number of carrots to motivate industry to develop and market greener products.	x		the integrated product policy (IPP) is a form of soft legislation seeking to motivate companies to engage in ecodesign		x	x			Sustainable Production	x
2005	Hauschild, Jeswiet, Alting	EU	From Life Cycle Assessment to Sustainable Production: Status and Perspectives	Journal Publication	CIRP Annals - Manufacturing Technology	Compare different concepts / definitions / terminology	[...] a stronger future trend towards life cycle thinking in industry must be founded now in our education of future generations of citizens, customers, and employees and here not least the engineers who shall generate the solutions for a sustainable future. The development of environmental awareness must start in primary schools and be an integrated part of the learning all the way through the e…		x	more education and training of the general public on issues relating to awareness and knowledge of environmental issues is necessary			x			Sustainable Production	x
2005	Jeswiet, Hauschild	EU	EcoDesign and future environmental impacts	Journal Publication	Materials and Design	Compare different concepts / definitions / terminology	Changes can be expected due to micro/nano technology with concomitant environmental impacts. Changes can also be expected with the increasing complexity of products and in the machine tool and automation tool sector with the development of new techniques. The increased rates of production needed and, possibly, in- creased environmental impacts.		x	new technological developments will have unforeseen environmental impacts		x	x			Ecodesign	x
2005	Jeswiet, Hauschild	EU	EcoDesign and future environmental impacts	Journal Publication	Materials and Design	Compare different concepts / definitions / terminology	New EcoDesign tools will be needed at an early stage to identify functional, economic or environmental prob- lems and any associated risks.		x	new ecodesign methods and tools are needed for the early phase of the product development process			x	x		Ecodesign	x
2005	Jeswiet, Hauschild	EU	EcoDesign and future environmental impacts	Journal Publication	Materials and Design	Compare different concepts / definitions / terminology	Risk analysis will become more prevalent. In addition, it will also become increasingly important in product development to conduct an LCA [life cycle assessment] as early as possible, and may even become a product requirement in some jurisdictions.		x	conducting an early life cycle assessment (LCA) and risk assessment will become increasingly important			x	x		Ecodesign	x
2005	Lindahl	EU	Engineering designers/designers/engineers' Requirements on Design for Environment Methods and Tools	Doctoral Thesis	Royal Institute of Technology, Stockholm	Thesis: provide a literature review and introduce a new concept / framework / method	Designers are in general satisfied with their utilized methods and tools, and this satisfaction includes their comprehended usefulness of the outcome from their most utilized method or tool.	x		designers are generally satisfied with the functionality of existing ecodesign methods and tools				x		Design for Environment	x
2005	Lindahl	EU	Engineering designers/designers/engineers' Requirements on Design for Environment Methods and Tools	Doctoral Thesis	Royal Institute of Technology, Stockholm	Thesis: provide a literature review and introduce a new concept / framework / method	[...] one finding is that a low degree of follow-up implies a risk that methods and tools are used that affect the work within the company in a negative way. One example is when a manager receives false indications about how a method or tool fulfills its intended aim. Therefore, the conclusion is that there is a need for an improved follow-up regarding both the utilization and usefulness of metho…		x	follow-up on the utilization and effectiveness of ecodesign methods and tools needs to be improved			x	x		Design for Environment	x
2005	Lindahl	EU	Engineering designers/designers/engineers' Requirements on Design for Environment Methods and Tools	Doctoral Thesis	Royal Institute of Technology, Stockholm	Thesis: provide a literature review and introduce a new concept / framework / method	Another finding is that designers in general have three main purposes for utilizing methods and tools, of which the last two could be seen as parts of the first one. The purposes are to: (1) facilitate various kinds of communication within the product development process; (2) integrate knowledge and experience into the methods and tools as a know-how backup; and (3) contribute with structure in t…		x	the main purposes for ecodesign method and tool utilization are facilitation of communication, integration of knowledge and experience and contribution to the product development process (PDP)			x	x		Design for Environment	x
2005	Lindahl	EU	Engineering designers/designers/engineers' Requirements on Design for Environment Methods and Tools	Doctoral Thesis	Royal Institute of Technology, Stockholm	Thesis: provide a literature review and introduce a new concept / framework / method	Despite being satisfied with the method and tool education, designers would like more methods and tools as well as more education and time for reflection on their method and tool utilization. The current low degree of method and tool follow-up implies a considerable risk that management, instead of discarding a method or tool that is not useful, will instead introduce additional unsuitable method…		x	better education on ecodesign methods and tools could ensure that the right tools are used in the right way			x	x		Design for Environment	x
2005	Lindahl	EU	Engineering designers/designers/engineers' Requirements on Design for Environment Methods and Tools	Doctoral Thesis	Royal Institute of Technology, Stockholm	Thesis: provide a literature review and introduce a new concept / framework / method	One major obstacle for an increased level of DfE [design for environment] utilization is that designers in general lacked the relevant education/knowledge. Another obstacle is that environmental issues are still not often integrated into the ordinary product development. Instead, these issues are treated as a parallel activity, something that is further influenced by the fact that many DfE method…		x	cost, lack of education and training and the abscence of ecodesign within a company in general are the most prohibitive obstacles for usage of ecodesign methods and tools within companies			x	x		Design for Environment	x
2005	Lindahl	EU	Engineering designers/designers/engineers' Requirements on Design for Environment Methods and Tools	Doctoral Thesis	Royal Institute of Technology, Stockholm	Thesis: provide a literature review and introduce a new concept / framework / method	[...] a DfE [design for environment] as well as a common method or tool must exhibit the following: (1) be easy to adopt and implement [...] (2) facilitate designers to fulfill specified requirements on the presumptive product [...] (3) reduce the risk that important elements in the product development phase are forgotten [...] (4) must reduce the total calendar time (from start to end) to solve …		x	ecodesign methods and tools should be easy to learn, help fulfil product requirements, cover the complete product development process (PDP) and reduce the required time to solve the task			x	x		Design for Environment	x
2005	Lindahl	EU	Engineering designers/designers/engineers' Requirements on Design for Environment Methods and Tools	Doctoral Thesis	Royal Institute of Technology, Stockholm	Thesis: provide a literature review and introduce a new concept / framework / method	How method and tool requirements can be utilized to increase the active use in industry of DfE methods and tools: [...] DfE methods and tools must be designed to, in a higher degree, comply to the primary users, in this case designers’ requirements for methods and tools. [...] designers’ requirements for methods and tools in general and for DfE in particular can be utilized as a means in a select…		x	to increase utilization of ecodesign methods and tools, ensure that these methods and tools fulfil the designers' requirements			x	x		Design for Environment	x
2005	Lindahl	EU	Engineering designers/designers/engineers' Requirements on Design for Environment Methods and Tools	Doctoral Thesis	Royal Institute of Technology, Stockholm	Thesis: provide a literature review and introduce a new concept / framework / method	[…] there is a lack of formal and well-known aims for and requirements on methods and tools […]	x		aims for and requirements on ecodesign methods and tools are missing			x	x		Design for Environment	x
2005	Lindahl	EU	Engineering designers/designers/engineers' Requirements on Design for Environment Methods and Tools	Doctoral Thesis	Royal Institute of Technology, Stockholm	Thesis: provide a literature review and introduce a new concept / framework / method	[…] methods and tools are generally selected in unstructured and ad-hoc ways […]	x		selection of ecodesign methods and tools is unstructured			x	x		Design for Environment	x
2005	Lindahl	EU	Engineering designers/designers/engineers' Requirements on Design for Environment Methods and Tools	Doctoral Thesis	Royal Institute of Technology, Stockholm	Thesis: provide a literature review and introduce a new concept / framework / method	One special issue of interest will be to reach an increased understanding of how and to what degree cultural differences, for example between Japan and Europe, influence what requirements designers state on their design methods and tools, and in particular for DfE [design for environment] methods and tools. The assumption is, in general, that cultural differences, especially between countries far…	x		cultural differences may affect requirements for ecodesign methods and tools				x		Design for Environment	x
2005	Lindahl	EU	Engineering designers/designers/engineers' Requirements on Design for Environment Methods and Tools	Doctoral Thesis	Royal Institute of Technology, Stockholm	Thesis: provide a literature review and introduce a new concept / framework / method	Another important issue is to obtain a deeper understanding regarding what requirements designers have for methods and tools that are specifically used in the early phases of the product development.		x	a better understanding of the designers' requirements for ecodesign methods and tools for the early phases of product development is necessary			x	x		Design for Environment	x
2005	Lindahl	EU	Engineering designers/designers/engineers' Requirements on Design for Environment Methods and Tools	Doctoral Thesis	Royal Institute of Technology, Stockholm	Thesis: provide a literature review and introduce a new concept / framework / method	[...] an interesting issue would be to utilize the increased understanding about designers’ requirements, not only in their selection of DfE [design for environment] methods and tools, but also in the method and tool developers’ development of DfE methods and tools. The aim is to conduct such research in cooperation with selected companies that are about to implement DfE methods and tools, and to…		x	a better understanding of the designers' requirements for ecodesign methods and tools should be used for developing new methods and tools			x	x		Design for Environment	x
2005	Navarro Rizo, Ceca, Ruiz	EU	Ecodesign Function and Form. Classification of Ecodesign Tools According to Their Functional Aspects	Conference Proceeding	ICED 05: 15th International Conference on Engineering Design	Review methods and tools	[…] enough tools are available for problems of the “Ecodesign” level […] another conclusion would be the lack of tools for Ecoinnovation, for those Ecodesign problems that are more ambitious […]	x		tools for more radical ecodesign are lacking			x	x		Ecodesign	x
2005	Navarro Rizo, Ceca, Ruiz	EU	Ecodesign Function and Form. Classification of Ecodesign Tools According to Their Functional Aspects	Conference Proceeding	ICED 05: 15th International Conference on Engineering Design	Review methods and tools	[…] the stages with most tools turned out to be: “Identification of Environmental Impacts”, proposal of “Improvement Ideas” and “Conceptual Design” […]	x		most ecodesign tools exist for identifying environmental impacts, proposing ideas for improvement and conceptual design				x		Ecodesign	x
2005	Navarro Rizo, Ceca, Ruiz	EU	Ecodesign Function and Form. Classification of Ecodesign Tools According to Their Functional Aspects	Conference Proceeding	ICED 05: 15th International Conference on Engineering Design	Review methods and tools	The stages about “Preparation of the Project”, “Elaboration of an Action Plan” and “Evaluation of the Process” have been found to have significantly fewer publications with proposals of tools […]	x		few ecodesign tools exist for project preparation, action plan elaboration and process evaluation				x		Ecodesign	x
2005	Navarro Rizo, Ceca, Ruiz	EU	Ecodesign Function and Form. Classification of Ecodesign Tools According to Their Functional Aspects	Conference Proceeding	ICED 05: 15th International Conference on Engineering Design	Review methods and tools	As regards Life Cycle stages, the stage least taken into consideration was that of “Distribution”. This is certainly a result of the lack of awareness about the importance of the environmental impact of distribution for a certain range of products, as well as of the deficiency of external pressure from the administration, public opinion or clients.	x		the life cycle stage of distribution is so far given least consideration in ecodesign			x			Ecodesign	x
2005	Rocchi	EU	Enhancing sustainable innovation by design. An approach to the co-creation of economic, social and environmental value	Doctoral Thesis	Erasmus University Rotterdam	Thesis: provide a literature review and introduce a new concept / framework / method	Realize that effectiveness means more than efficiency: Sustainability theories argue that eco-efficiency is a necessary, although not in itself completely sufficient, condition for the construction of a healthy society in the future. In particular, some theories assert that technology alone, even an environmentally friendly technology, cannot create sustainable value for 8 to 10 billion people in…	x		eco-effectiveness is not the same as eco-efficiency - only the former ensures true sustainability	x					-	x
2005	Rocchi	EU	Enhancing sustainable innovation by design. An approach to the co-creation of economic, social and environmental value	Doctoral Thesis	Erasmus University Rotterdam	Thesis: provide a literature review and introduce a new concept / framework / method	Value results and not products: What people currently value in advanced societies is not so much the material and tangible components of a business offer but its results, in terms of its functional performance, the experience provided, and the meanings represented. Since, from this perspective, the economic value of a solution is becoming increasingly related to its intangible benefits, new dynam…		x	designers should focus on value creation for the customer, not product creation			x			-	x
2005	Rocchi	EU	Enhancing sustainable innovation by design. An approach to the co-creation of economic, social and environmental value	Doctoral Thesis	Erasmus University Rotterdam	Thesis: provide a literature review and introduce a new concept / framework / method	View partnership-building as a way of working: Competitive and sustainable product-service systems can rarely both be provided by a single company. Enterprizes today need to establish alliances with suppliers, retailers, other business partners and, sometimes, not-for-profit organizations and public bodies, to co-produce adequate answers for users with increasingly complex lifestyles and societie…		x	companies providing product service systems (PSS) should engage in strategic partnerships with businesses and other organizations			x			-	x
2005	Rocchi	EU	Enhancing sustainable innovation by design. An approach to the co-creation of economic, social and environmental value	Doctoral Thesis	Erasmus University Rotterdam	Thesis: provide a literature review and introduce a new concept / framework / method	Treat users as innovators: In a value co-creation process, professional customers and end-users can assume an important role. They can be involved in the design and development of a new business offer to better meet their individual specifications.		x	designers should involve users into the value creation process			x			-	x
2005	Rocchi	EU	Enhancing sustainable innovation by design. An approach to the co-creation of economic, social and environmental value	Doctoral Thesis	Erasmus University Rotterdam	Thesis: provide a literature review and introduce a new concept / framework / method	Create better business models rather than get to the market first: […] • ‘New visions’ and ‘creativity’ and ‘entrepreneurialism’ are becoming crucial in a market in which decisions have to be made without the benefit of complete information. • Knowledge is often externally developed but internally adapted and integrated. • Specific ‘content’ and ‘services’ capabilities are delivered by an interna…		x	practitioners should aim for better business models, rather than being first to the market			x		x	-	x
2005	Rocchi	EU	Enhancing sustainable innovation by design. An approach to the co-creation of economic, social and environmental value	Doctoral Thesis	Erasmus University Rotterdam	Thesis: provide a literature review and introduce a new concept / framework / method	Diversify the options for revenue generation: […] • use of re-furbished technologies and components in second-hand or new business value propositions (cost reductions) • marketing of finished or semi-finished products outside conventional sales contracts (for example, increasing current market shares via leasing, renting and pay-per-use schemes) • commercialisation of new digital devices or speci…		x	designers should diversify options for revenue generation along the product life cycle			x			-	x
2005	Rocchi	EU	Enhancing sustainable innovation by design. An approach to the co-creation of economic, social and environmental value	Doctoral Thesis	Erasmus University Rotterdam	Thesis: provide a literature review and introduce a new concept / framework / method	View design as a holistic and strategic approach: Aiming to create sustainable product-service systems requires moving from ‘product thinking’ to ‘system thinking’, from downstream ‘as usual’ eco-design practices to upstream activities able to integrate and translate a variety of inputs and information into competitive and sustainable value propositions. [...] Design becomes instead an integral p…		x	designers should approach the product and service creation as a systemic, holistic process			x			-	x
2006	Boks	EU	The soft side of Ecodesign	Journal Publication	Journal of Cleaner Production	Combine two previously unrelated fields or concepts	The soft side of ecodesign plays an important role in the implementation of ecodesign, as much as that is clear. At least that is what companies indicate themselves; there is support for the proposition that internal value chain factors are experienced by companies as relatively more important than external value chain issues [...]	x		internal value chain factors seem to be more important in ecodesign than external value chain factors			x			Ecodesign	x
2006	Boks	EU	The soft side of Ecodesign	Journal Publication	Journal of Cleaner Production	Combine two previously unrelated fields or concepts	A clear distinction should however, be made between the type of internal value chain issues, as, with regards to success factors, conventional internal value chain issues appear to play a dominant role, whereas in terms of obstacles, more socio-psychological factors are mentioned.	x		obstacles for internal value chain issues appear to be dominated by socio-psychological factors			x		x	Ecodesign	x
2006	Boks	EU	The soft side of Ecodesign	Journal Publication	Journal of Cleaner Production	Combine two previously unrelated fields or concepts	[…] (scientific) research focusing on successful implementation of ecodesign has largely or even systematically neglected these sociological, psychological, emotional and intangible factors that can ‘make or break’ implementation processes.	x		socio-psychological issues have been largely ignored in ecodesign thus far			x		x	Ecodesign	x
2006	Boks	EU	The soft side of Ecodesign	Journal Publication	Journal of Cleaner Production	Combine two previously unrelated fields or concepts	[…] the soft side of ecodesign plays its most important role […] in the earlier part of the PDP [product development process], where information dissemination is most crucial.	x		socio-psychological issues are most important during the early stages of the product development process (PDP)			x		x	Ecodesign	x
2006	Boks	EU	The soft side of Ecodesign	Journal Publication	Journal of Cleaner Production	Combine two previously unrelated fields or concepts	A persistent focus on systems perspectives […] generalizations and headstrong software tool development, as can still be observed, is perhaps not the way to go forward.	x		a systems perspective, tool development and general recommendations seem to be over-emphasized			x	x		Ecodesign	x
2006	Boks	EU	The soft side of Ecodesign	Journal Publication	Journal of Cleaner Production	Combine two previously unrelated fields or concepts	The involvement of (business) psychologists and business organisation specialists could turn out to be crucial here [...] because one could suppose that currently, there is already enough information about how to do ecodesign, it is just pertinent to make it readily available to the right people, and to make sure they know how to use it [...]		x	there is enough ecodesign knowledge, more important is the spreading and application of this knowledge			x			Ecodesign	x
2006	Boks	EU	The soft side of Ecodesign	Journal Publication	Journal of Cleaner Production	Combine two previously unrelated fields or concepts	Researchers would be wise to study the industry’s experience with such practical guidelines [referring to the ISO 14062], and to disseminate and integrate learning in tailor-made applications.		x	researchers would benefit from studying practical ecodesign guidelines			x	x		Ecodesign	x
2006	Boks	EU	The soft side of Ecodesign	Journal Publication	Journal of Cleaner Production	Combine two previously unrelated fields or concepts	The role of communication, language and personal views and objectives should be over- rather than under-stressed.		x	communication, language and personal views and goals are very important in ecodesign			x		x	Ecodesign	x
2006	Karlsson, Luttropp	EU	EcoDesign: what's happening? An overview of the subject area of EcoDesign and of the papers in this special issue	Journal Publication	Journal of Cleaner Production	Provide a general / historical overview of the field	The tools in EcoDesign are not as important as specification and goal setting in early product development phases.	x		tools are less important than goal setting in the early product development phases			x	x		Ecodesign	x
2006	Karlsson, Luttropp	EU	EcoDesign: what's happening? An overview of the subject area of EcoDesign and of the papers in this special issue	Journal Publication	Journal of Cleaner Production	Provide a general / historical overview of the field	How to organize product development is crucial in order to reach higher degrees of sustainability.	x		organization of product development is crucial for reaching higher degrees of sustainability			x		x	Ecodesign	x
2006	Karlsson, Luttropp	EU	EcoDesign: what's happening? An overview of the subject area of EcoDesign and of the papers in this special issue	Journal Publication	Journal of Cleaner Production	Provide a general / historical overview of the field	The interrelations between resources and functionality must be enhanced.		x	functionality and resources should be closely coupled			x			Ecodesign	x
2006	Karlsson, Luttropp	EU	EcoDesign: what's happening? An overview of the subject area of EcoDesign and of the papers in this special issue	Journal Publication	Journal of Cleaner Production	Provide a general / historical overview of the field	Design has to work in concert with market priorities.		x	market priorities need to be considered in ecodesign			x		x	Ecodesign	x
2006	Karlsson, Luttropp	EU	EcoDesign: what's happening? An overview of the subject area of EcoDesign and of the papers in this special issue	Journal Publication	Journal of Cleaner Production	Provide a general / historical overview of the field	Life-style preferences and immaterial aspects are fundamental.		x	ecodesign goes beyond pure technical aspects			x			Ecodesign	x
2006	Karlsson, Luttropp	EU	EcoDesign: what's happening? An overview of the subject area of EcoDesign and of the papers in this special issue	Journal Publication	Journal of Cleaner Production	Provide a general / historical overview of the field	EcoEfficiency is not sufficient; we have to aim for EcoEffective products.		x	eco-efficiency is not enough, instead aim for eco-effectiveness	x		x			Ecodesign	x
2006	Karlsson, Luttropp	EU	EcoDesign: what's happening? An overview of the subject area of EcoDesign and of the papers in this special issue	Journal Publication	Journal of Cleaner Production	Provide a general / historical overview of the field	The present scope mainly focuses on reduction of environmental loads.	x		ecodesign currently focuses mostly on reducing environmental impact		x				Ecodesign	x
2006	Maxwell, Sheate, van der Vorst	EU	Functional and systems aspects of the sustainable product and service development approach for industry	Journal Publication	Journal of Cleaner Production	Provide a general / historical overview of the field	Key success factors relating to functional and systems issues were: - Considering functionality, wider systems interaction, all life cycle stages and advocating a closed loop approach in offering development on a co-operative basis as part of a structured process and not in isolation. - An open mindset not focused on any one method of function provision (services, products or PSS) and assessment …	x		key success factors for ecodesign implementation include systems thinking, information sharing, openness to solutions (product or service), complete assessment, life cycle perspective, closed loop approach, recognizing potential negative effects of product service systems (PSS)			x	x		Sustainable Product and Service Development	x
2006	Maxwell, Sheate, van der Vorst	EU	Functional and systems aspects of the sustainable product and service development approach for industry	Journal Publication	Journal of Cleaner Production	Provide a general / historical overview of the field	[…] a range of influencing factors impact the extent of uptake of the strategies incorporated. For functional and systems thinking, a lack of push and pull factors to motivate companies to consider these aspects was key […]	x		companies lack push and pull factors to engage in ecodesign			x			Sustainable Product and Service Development	x
2006	Maxwell, Sheate, van der Vorst	EU	Functional and systems aspects of the sustainable product and service development approach for industry	Journal Publication	Journal of Cleaner Production	Provide a general / historical overview of the field	In terms of the big picture, wider SCP [sustainable consumption and production] solutions encompassing varied aspects, e.g. physical infrastructure, technology innovations, diverse policy, legal and market instruments, new business and consumer models, all incorporating the factors necessary to motivate producers and consumers, and involving wide system level stakeholder engagement, have been ide…		x	for sustainable solutions, a system level stakeholder engagement is necessary			x			Sustainable Product and Service Development	x
2006	Maxwell, Sheate, van der Vorst	EU	Functional and systems aspects of the sustainable product and service development approach for industry	Journal Publication	Journal of Cleaner Production	Provide a general / historical overview of the field	On the functional level, a re-evaluation of human needs and wants is part of this solution with new definitions for how consumers and producers measure value reflected in new business and consumer models.		x	for sustainable solutions, re-evaluation of human wants and needs is necessary			x			Sustainable Product and Service Development	x
2006	Tukker, Tischner	EU	Product-services as a research field: past, present and future. Reflections from a decade of research	Journal Publication	Journal of Industrial Ecology	Provide a general / historical overview of the field	First, PSS [product service systems] have certainly a potential to enhance competitiveness and contribute to sustainability. But this potential win-win can only be realised by a careful design of the PSS, and may not always be achievable.	x		product service systems (PSS) are not always more sustainable than products			x			Product Service Systems	x
2006	Tukker, Tischner	EU	Product-services as a research field: past, present and future. Reflections from a decade of research	Journal Publication	Journal of Industrial Ecology	Provide a general / historical overview of the field	The sustainable PSS [product service systems] community seems to be biased by the normatively desired sustainability promise of the PSS concept, under-addressing issues like consumer acceptance and business sense in the process. If PSS ever want to create a science field in its own right, it is paramount to involve practitioners from such research fields, to enrich and link the various individual…		x	consumer acceptence and economic gains need to be addressed more in research on product service systems (PSS)			x			Product Service Systems	x
2006	Tukker, Tischner	EU	Product-services as a research field: past, present and future. Reflections from a decade of research	Journal Publication	Journal of Industrial Ecology	Provide a general / historical overview of the field	And second, one simply has to accept that win-wins not always exist. True radical system innovations are a form of creative destruction, in which also contextual factors and framework conditions must change. This needs a much broader system approach than the business-consumer interaction along a value chain, so central in the PSS [product service systems] concept.		x	significant gains on sustainability performance of product service systems (PSS) require radical innovation, which means a broader systems approach (than merely business-customer)			x			Product Service Systems	x
2007	Baines, Lightfoot, Steve, Neely, Greenough, Peppard, Roy, Shehab, Braganza, Tiwari, Alcock, Angus, Bastl, Cousens, Irving, Johnson, Kingston, Lockett, Martinez, Michele, Tranfield, Walton, Wilson	EU	State-of-the-art in product-service systems	Journal Publication	Proceedings of the Institution of Mechanical Engineers, Part B: Journal of Engineering Manufacture	Provide a general / historical overview of the field	[The product service system] concept originated in Northern Europe in the late 1990s and, to date, most contributors have been academics from environmental and social sciences.	x		the concept of product services systems (PSS) originated in Northern Europe from the environmental and social sciences		x				Product Service Systems	x
2007	Baines, Lightfoot, Steve, Neely, Greenough, Peppard, Roy, Shehab, Braganza, Tiwari, Alcock, Angus, Bastl, Cousens, Irving, Johnson, Kingston, Lockett, Martinez, Michele, Tranfield, Walton, Wilson	EU	State-of-the-art in product-service systems	Journal Publication	Proceedings of the Institution of Mechanical Engineers, Part B: Journal of Engineering Manufacture	Provide a general / historical overview of the field	There are a diverse range of PSS [product service systems] examples in the literature with some demonstrating economic success but most tending to emphasize significant environmental and social gains.	x		in the literature, mostly social and environmental gains of product services systems (PSS) are emphasized over economic gains		x				Product Service Systems	x
2007	Baines, Lightfoot, Steve, Neely, Greenough, Peppard, Roy, Shehab, Braganza, Tiwari, Alcock, Angus, Bastl, Cousens, Irving, Johnson, Kingston, Lockett, Martinez, Michele, Tranfield, Walton, Wilson	EU	State-of-the-art in product-service systems	Journal Publication	Proceedings of the Institution of Mechanical Engineers, Part B: Journal of Engineering Manufacture	Provide a general / historical overview of the field	[…] while some methods and practices are proposed for designing and operating PSSs [product service systems], these tend to lack the pedigree that is formed through careful evaluation in practice […]	x		the existing methods and tools for product services system (PSS) design and operation do not suffice				x		Product Service Systems	x
2007	Baines, Lightfoot, Steve, Neely, Greenough, Peppard, Roy, Shehab, Braganza, Tiwari, Alcock, Angus, Bastl, Cousens, Irving, Johnson, Kingston, Lockett, Martinez, Michele, Tranfield, Walton, Wilson	EU	State-of-the-art in product-service systems	Journal Publication	Proceedings of the Institution of Mechanical Engineers, Part B: Journal of Engineering Manufacture	Provide a general / historical overview of the field	There are, however, some key barriers to the adoption of PSS [product service systems]; for instance, consumers may not be enthusiastic about ownerless consumption. […] the lack of regulatory drivers, and the fact that in developed countries consumers may not be excited about ownerless consumption, is perceived by companies as potential barriers to the adoption of a PSS [product service systems] …	x		consumers valuing ownership hamper the introduction of product service systems (PSS)			x			Product Service Systems	x
2007	Baines, Lightfoot, Steve, Neely, Greenough, Peppard, Roy, Shehab, Braganza, Tiwari, Alcock, Angus, Bastl, Cousens, Irving, Johnson, Kingston, Lockett, Martinez, Michele, Tranfield, Walton, Wilson	EU	State-of-the-art in product-service systems	Journal Publication	Proceedings of the Institution of Mechanical Engineers, Part B: Journal of Engineering Manufacture	Provide a general / historical overview of the field	The principal issues concern the lack of well-developed tools and methodologies that can provide manufacturers with a business-wide guide for the implementation of PSSs [product service systems].	x		product service systems (PSS) lack methods and tools supporting their implementation				x		Product Service Systems	x
2007	Baines, Lightfoot, Steve, Neely, Greenough, Peppard, Roy, Shehab, Braganza, Tiwari, Alcock, Angus, Bastl, Cousens, Irving, Johnson, Kingston, Lockett, Martinez, Michele, Tranfield, Walton, Wilson	EU	State-of-the-art in product-service systems	Journal Publication	Proceedings of the Institution of Mechanical Engineers, Part B: Journal of Engineering Manufacture	Provide a general / historical overview of the field	[…] of particular benefit would be a geographical widening of the research community and an increased contribution from authors in Manufacturing, Engineering, Design, and Management.		x	researchers in the field of product service systems (PSS) should collaborate across disciplines			x		x	Product Service Systems	x
2007	Baines, Lightfoot, Steve, Neely, Greenough, Peppard, Roy, Shehab, Braganza, Tiwari, Alcock, Angus, Bastl, Cousens, Irving, Johnson, Kingston, Lockett, Martinez, Michele, Tranfield, Walton, Wilson	EU	State-of-the-art in product-service systems	Journal Publication	Proceedings of the Institution of Mechanical Engineers, Part B: Journal of Engineering Manufacture	Provide a general / historical overview of the field	To be both effective and efficient, manufacturers need, for example, to be able to understand how their customers will value their services.		x	companies transitioning towards product service systems (PSS) need to understand how customers value their service			x			Product Service Systems	x
2007	Baines, Lightfoot, Steve, Neely, Greenough, Peppard, Roy, Shehab, Braganza, Tiwari, Alcock, Angus, Bastl, Cousens, Irving, Johnson, Kingston, Lockett, Martinez, Michele, Tranfield, Walton, Wilson	EU	State-of-the-art in product-service systems	Journal Publication	Proceedings of the Institution of Mechanical Engineers, Part B: Journal of Engineering Manufacture	Provide a general / historical overview of the field	Similarly, [manufacturers] will need to be able to configure their products, technologies, operations, and supply chain to support this value offering.		x	companies transitioning towards product service systems (PSS) need to configure their products, technologies, operations and supply chain			x		x	Product Service Systems	x
2007	Baines, Lightfoot, Steve, Neely, Greenough, Peppard, Roy, Shehab, Braganza, Tiwari, Alcock, Angus, Bastl, Cousens, Irving, Johnson, Kingston, Lockett, Martinez, Michele, Tranfield, Walton, Wilson	EU	State-of-the-art in product-service systems	Journal Publication	Proceedings of the Institution of Mechanical Engineers, Part B: Journal of Engineering Manufacture	Provide a general / historical overview of the field	Yet, as this paper has gone someway to demonstrate, there is little guidance available for manufacturers in this situation. Indeed, the following research questions can be poised: 1. How are servitized organizations and PSSs [product service systems] designed? 2. How are servitized organizations and PSSs built and delivered? 3. How are servitized organizations and PSSs sustained by the network? 4…		x	future research on product service systems (PSS) should focus on the design and delivery, maintenance of PSS and their developing organizations, assessing the value delivery of PSS and on the transition of companies towards PSS			x			Product Service Systems	x
2007	Boks, Stevels	EU	Essential perspectives for design for environment. Experiences from the electronics industry	Journal Publication	International Journal of Production Research	Provide a general / historical overview of the field	[…] with increasing knowledge of industrial processes in all stages of the life cycle, it has become clear that Design for Environment will not allow for many generic principles […]	x		ecodesign does not benefit much from generic principles			x			Design for Environment	x
2007	Boks, Stevels	EU	Essential perspectives for design for environment. Experiences from the electronics industry	Journal Publication	International Journal of Production Research	Provide a general / historical overview of the field	[...] traditional perspectives in Design for Environment, which are still prevailing in many research institutes around the world, are likely to be suboptimal from an eco-efficiency perspective, and can be counterproductive even from a purely environmental perspective [...]	x		traditional perspectives on ecodesign may be counterproductive			x			Design for Environment	x
2007	Boks, Stevels	EU	Essential perspectives for design for environment. Experiences from the electronics industry	Journal Publication	International Journal of Production Research	Provide a general / historical overview of the field	This has a consequence for what DFE [design for environment] practitioners are and can be: they cannot apply design rules from an ecodesign cook book, rather they are design managers, that need to be able to look across disciplinary and life-cycle boundaries [...], weighing functionalities and stakeholder interests [...]		x	practitioners need to apply generic ecodesign rules and guidelines to their individual context and manage trade-offs			x			Design for Environment	x
2007	Boks, Stevels	EU	Essential perspectives for design for environment. Experiences from the electronics industry	Journal Publication	International Journal of Production Research	Provide a general / historical overview of the field	[…] [researchers should] engage in closer communications with industry, not with solely prescriptive motives […] but with an open mind for understanding industry’s drivers, do’s and can’t do’s […]		x	researchers should engage with companies to understand their drivers and limitations			x			Design for Environment	x
2007	Boks, Stevels	EU	Essential perspectives for design for environment. Experiences from the electronics industry	Journal Publication	International Journal of Production Research	Provide a general / historical overview of the field	Future research will have to address the understanding of drivers of individual industries and even companies in relation to possible environmental strategies, to improve understanding which general Design for Environment principles will hold up as ‘generic truths’, and which ones will not. [...] This is expected, by the authors, to lead to the insight that increased levels of customization of kn…		x	ecodesign implementation would benefit from customization of general knowledge			x			Design for Environment	x
2007	Charter, Clark	EU	Sustainable Innovation: Key conclusions from Sustainable Innovation Conferences 2003–2006 organised by The Centre for Sustainable Design	Report	Centre for Sustainable Design	Identify barriers / requirements / success factors for successful ecodesign implementation	Product and market drivers: - pressures for material and energy cost savings are driving dematerialisation and material substitution - In some markets, green elements have become mainstream e.g. vehicles - In some markets there seems to be a trend towards green just being seen as an integral part of a good brand/product/company - There are indications that customers in some markets are increasing…	x		drivers for ecodesign include cost savings, mainstreaming, company image, customer expectations and demand, investor behavior, risk management			x		x	Sustainable Innovation	x
2007	Charter, Clark	EU	Sustainable Innovation: Key conclusions from Sustainable Innovation Conferences 2003–2006 organised by The Centre for Sustainable Design	Report	Centre for Sustainable Design	Identify barriers / requirements / success factors for successful ecodesign implementation	General level of application: - Mostly incremental environmental improvement - Product designers mostly new to sustainable innovation - Eco-design stagnating in some countries and companies, growing in others - Social and wider sustainability issues emerging - Japanese companies are progressively implementing eco-design programmes and this appears to be part of broader plan that has been agreed b…	x		implementation of ecodesign mostly limited to incremental improvements, most designers are new to the field, social issues becoming increasingly important, Japan seems to be leading		x	x			Sustainable Innovation	x
2007	Charter, Clark	EU	Sustainable Innovation: Key conclusions from Sustainable Innovation Conferences 2003–2006 organised by The Centre for Sustainable Design	Report	Centre for Sustainable Design	Identify barriers / requirements / success factors for successful ecodesign implementation	Availability and application of tools and methodologies: - A range of eco-design and SPDD [sustainable product design and development] methodologies have emerged over the last decade - Various companies [...] are starting to experiment with mechanisms to stimulate sustainable innovation e.g. development of an external advisory board, workshops, etc. - Leading companies are developing their own in…	x		many ecodesign methods and tools are available, some companies are developing their own				x		Sustainable Innovation	x
2007	Charter, Clark	EU	Sustainable Innovation: Key conclusions from Sustainable Innovation Conferences 2003–2006 organised by The Centre for Sustainable Design	Report	Centre for Sustainable Design	Identify barriers / requirements / success factors for successful ecodesign implementation	Product-Service Systems (PSS): - Businesses do not use PSS terminology and see it as an academic definition for something that they are already doing - In many firms it appears that PSS development may not be as integrated, systematic and structured as it could be - PSSs are not necessarily more sustainable as much depends on the ‘system design’ and impacts are very case dependant - Thinking in P…	x		product service systems (PSS): no common language between business and research, PSS development could be improved, are not necessarily more sustainable, might lead to a better customer focus, lack positive examples/case studies, focus on actual needs might benefit sustainability			x			Sustainable Innovation	x
2007	Charter, Clark	EU	Sustainable Innovation: Key conclusions from Sustainable Innovation Conferences 2003–2006 organised by The Centre for Sustainable Design	Report	Centre for Sustainable Design	Identify barriers / requirements / success factors for successful ecodesign implementation	System level obstacles: - Lack of strong triggers and drivers for system change - System inertia […] - […] lack of breakthrough technologies	x		systemic barriers to ecodesign			x			Sustainable Innovation	x
2007	Charter, Clark	EU	Sustainable Innovation: Key conclusions from Sustainable Innovation Conferences 2003–2006 organised by The Centre for Sustainable Design	Report	Centre for Sustainable Design	Identify barriers / requirements / success factors for successful ecodesign implementation	Market obstacles: - Lack of market awareness - Lack of market incentives	x		market barriers to ecodesign			x			Sustainable Innovation	x
2007	Charter, Clark	EU	Sustainable Innovation: Key conclusions from Sustainable Innovation Conferences 2003–2006 organised by The Centre for Sustainable Design	Report	Centre for Sustainable Design	Identify barriers / requirements / success factors for successful ecodesign implementation	Financial obstacles: - Lack of venture and seed capital - Limited interest by financial markets	x		financial barriers to ecodesign			x			Sustainable Innovation	x
2007	Charter, Clark	EU	Sustainable Innovation: Key conclusions from Sustainable Innovation Conferences 2003–2006 organised by The Centre for Sustainable Design	Report	Centre for Sustainable Design	Identify barriers / requirements / success factors for successful ecodesign implementation	Policy obstacles: - Gaps: Most developments are new and yet to impact on markets to stimulate sustainable innovation - Uncertainty: […] need for environmental policies that are consistent, flexible and future-oriented - Lack of coordination	x		policy barriers to ecodesign			x			Sustainable Innovation	x
2007	Charter, Clark	EU	Sustainable Innovation: Key conclusions from Sustainable Innovation Conferences 2003–2006 organised by The Centre for Sustainable Design	Report	Centre for Sustainable Design	Identify barriers / requirements / success factors for successful ecodesign implementation	Obstacles in system structures: - Lack of links between players - Fragmentation of influence and decision-making	x		systemic barriers to ecodesign			x			Sustainable Innovation	x
2007	Charter, Clark	EU	Sustainable Innovation: Key conclusions from Sustainable Innovation Conferences 2003–2006 organised by The Centre for Sustainable Design	Report	Centre for Sustainable Design	Identify barriers / requirements / success factors for successful ecodesign implementation	Organisational obstacles: - Lack of senior level vision and commitment - Organisational structures - Organisational capabilities - Lack of engagement of marketing and other functions - Lack of understanding of implementation	x		organizational barriers to ecodesign			x			Sustainable Innovation	x
2007	Charter, Clark	EU	Sustainable Innovation: Key conclusions from Sustainable Innovation Conferences 2003–2006 organised by The Centre for Sustainable Design	Report	Centre for Sustainable Design	Identify barriers / requirements / success factors for successful ecodesign implementation	Conceptual obstacles: - Lack of clear definition [of Sustainable Innovation] - Lack of sustainability education, awareness and concern - Lack of common language between theoreticians and business - Lack of insight into solutions	x		conceptual barriers to ecodesign implementation include the lack of definitions, lack of education, lack of a common language between theoreticians and practitioners and lack of insight into solutions			x			Sustainable Innovation	x
2007	Charter, Clark	EU	Sustainable Innovation: Key conclusions from Sustainable Innovation Conferences 2003–2006 organised by The Centre for Sustainable Design	Report	Centre for Sustainable Design	Identify barriers / requirements / success factors for successful ecodesign implementation	General policy needs: - Clarification and bridges to policies for sustainable development - Positive links to opportunities - System level interventions - Policy framework - Priorities - Learning from experience - Considering scenarios - Developing countries		x	policy should set goals and priorities, include learning experiences and foster network buidling, aim at system level intervention and include developing countries			x			Sustainable Innovation	x
2007	Charter, Clark	EU	Sustainable Innovation: Key conclusions from Sustainable Innovation Conferences 2003–2006 organised by The Centre for Sustainable Design	Report	Centre for Sustainable Design	Identify barriers / requirements / success factors for successful ecodesign implementation	Policies for stimulating markets: - […] re-orientate existing markets towards higher levels of sustainability - Quantify the estimated short/medium/long-term markets for sustainable innovation - Increase momentum on sustainable public procurement and product policy - [...] include support for ‘eco-entrepreneurs’		x	policy to stimulate markets should aim for higher levels of sustainability, quantify the market for sustainable innovation, aim at public procurement and support eco-entrepreneurs			x			Sustainable Innovation	x
2007	Charter, Clark	EU	Sustainable Innovation: Key conclusions from Sustainable Innovation Conferences 2003–2006 organised by The Centre for Sustainable Design	Report	Centre for Sustainable Design	Identify barriers / requirements / success factors for successful ecodesign implementation	Policy needs for Sustainable Consumption and Production (SCP): - There is a need for clearer goals for SCP - Considering globalisation and changing production patterns - Integration into existing systems - System transformation - Global cooperation - Addressing consumption		x	policy to support sustainable consumption and production should define clear goals, consider globalization and changing consumption patterns, seek integration with existing systems, foster global cooperation and address consumption			x			Sustainable Innovation	x
2007	Charter, Clark	EU	Sustainable Innovation: Key conclusions from Sustainable Innovation Conferences 2003–2006 organised by The Centre for Sustainable Design	Report	Centre for Sustainable Design	Identify barriers / requirements / success factors for successful ecodesign implementation	Policy needs in relation to Integrated Product Policy (IPP): - Consider services as well as products - Cover sustainable innovation - Recognise the needs but also limitations of legislation and other policy instruments - Importance of green public procurement - Consider the roles of stakeholders and networks in fostering sustainable innovation		x	policy to support an integrated product policy efforts should cover both services and products, aim at public procurement, consider the role of stakeholders and networks and recognize the limitations of policy instruments			x			Sustainable Innovation	x
2007	Charter, Clark	EU	Sustainable Innovation: Key conclusions from Sustainable Innovation Conferences 2003–2006 organised by The Centre for Sustainable Design	Report	Centre for Sustainable Design	Identify barriers / requirements / success factors for successful ecodesign implementation	Example of a new policy approaches: long term agreements		x	long term agreements could be a suitable policy approach to support ecodesign efforts			x			Sustainable Innovation	x
2007	Charter, Clark	EU	Sustainable Innovation: Key conclusions from Sustainable Innovation Conferences 2003–2006 organised by The Centre for Sustainable Design	Report	Centre for Sustainable Design	Identify barriers / requirements / success factors for successful ecodesign implementation	General implementation requirements: - Mission and shared vision - Senior management buy-in - Business case - Integration and embedding in existing organisational processes - Explore opportunities for generating product-related environmental value - Learning through pilot approach - Ongoing development (not one-off) - Working with suppliers		x	ecodesign implementation in companies should be accompanied by a mission and shared vision, a business case, integration in existing processes, pilot projects, continuous development, supply chain cooperation			x		x	Sustainable Innovation	x
2007	Charter, Clark	EU	Sustainable Innovation: Key conclusions from Sustainable Innovation Conferences 2003–2006 organised by The Centre for Sustainable Design	Report	Centre for Sustainable Design	Identify barriers / requirements / success factors for successful ecodesign implementation	Organisational needs: - Vision and leadership - Culture - Integration into existing processes - Integration into product development and technology - Roles and responsibilities - Developing capabilities - Developing innovation networks		x	ecodesign implementation in companies should be supported by vision, leadership, culture, integration into existing processes (including product development), role assignment, capability development and network building			x			Sustainable Innovation	x
2007	Charter, Clark	EU	Sustainable Innovation: Key conclusions from Sustainable Innovation Conferences 2003–2006 organised by The Centre for Sustainable Design	Report	Centre for Sustainable Design	Identify barriers / requirements / success factors for successful ecodesign implementation	Role and needs of designers: - [Consider the designers' ] important potential contribution to sustainable innovation - Consider types of designers and interactions - Awareness and training - Need for inspiring examples - Need for tools and methodologies - Need for team approach		x	designers have an important role in ecodesign and require training, assistance and motivation			x		x	Sustainable Innovation	x
2007	Charter, Clark	EU	Sustainable Innovation: Key conclusions from Sustainable Innovation Conferences 2003–2006 organised by The Centre for Sustainable Design	Report	Centre for Sustainable Design	Identify barriers / requirements / success factors for successful ecodesign implementation	Needs for further research: - Analysing obstacles - Creating positive stories - […] develop a more concrete understanding of what is the role of sustainable innovation - Creating Sustainable Innovation Systems (SIS) - Organisational aspects of sustainable innovation - Role of academia		x	future research should focus on barriers for ecodesign implementation, positive stories, the role of ecodesign, creating sustainable innovation systems, organizational aspects of ecodesign, the role of academia			x			Sustainable Innovation	x
2007	Ljungberg	EU	Materials selection and design for development of sustainable products	Journal Publication	Materials and Design	Combine two previously unrelated fields or concepts	The Life Cycle Assessment concept might be the most effective way of determining the environmental impacts for all product stages from extract of material to the product disposal stage.	x		life cycle assessment (LCA) might be the most effective method for assessing life cycle sustainability				x		Sustainable Product Development	x
2007	Ljungberg	EU	Materials selection and design for development of sustainable products	Journal Publication	Materials and Design	Combine two previously unrelated fields or concepts	A price must be set for restoration on every environmental impact.		x	to pay for restoration, negative environmental externalities should be priced			x			Sustainable Product Development	x
2007	Ljungberg	EU	Materials selection and design for development of sustainable products	Journal Publication	Materials and Design	Combine two previously unrelated fields or concepts	"Full sustainability" can never be achieved for products according to thermodynamic laws.	x		due to thermodynamics, true sustainability will never be achieved	x					Sustainable Product Development	x
2007	Mulder	EU	Innovation for sustainable development: from environmental design to transition management	Journal Publication	Materials and Design	Provide a general / historical overview of the field	Solutions will always be socio-technical in nature; they will, in other words, encompass technological as well as social transformation.		x	ecodesign solutions will always have both technological and social aspects	x		x			Environmental Design	x
2007	Mulder	EU	Innovation for sustainable development: from environmental design to transition management	Journal Publication	Integrated Research System for Sustainability Science	Provide a general / historical overview of the field	Improved technology may be the enemy of truly sustainable technology. Studies of technological change teach that the development of technology is a path-dependent process, i.e., choices cannot be made freely but are bound by the choices of the past. Similarly, choices today have consequences for the range of options left open to future generations. As a consequence, what today may appear to be an…	x		due to path dependency, incremental solutions may hamper radical innovation due to "lock-in"			x			Environmental Design	x
2007	Mulder	EU	Innovation for sustainable development: from environmental design to transition management	Journal Publication	Integrated Research System for Sustainability Science	Provide a general / historical overview of the field	Striving only for truly sustainable technologies may stop action being taken now. Solving the problems being faced today will hurt. Doubts about the viability of particular solutions often serve merely as an excuse for postponing action. In practice, the precautionary principle is frequently reversed: as long as the existence and gravity of the problem have not been proven beyond doubt, action is…	x		striving exclusively for truly sustainable solutions may prevent that any action is taken at all			x			Environmental Design	x
2007	Mulder	EU	Innovation for sustainable development: from environmental design to transition management	Journal Publication	Integrated Research System for Sustainability Science	Provide a general / historical overview of the field	[...] experience with parliamentary technology assessment during the last few decades of the twentieth century have shown that no more than limited insight is gained into the future impact of technologies, for that impact is intimately bound up with— or even indistinguishable from—wider, more general, cultural changes. Unforeseen rebound effects and new social dilemmas are frequently occurring. T…		x	technological strategies aiming for sustainability need to be flexible to be able to react to unforeseen developments			x			Environmental Design	x
2008	Telenko, Seepersad, Webber	NAR	A Compilation of Design for Environment Principles and Guidelines	Conference Proceeding	Proceedings of IDETC/CIE 2008	Review methods and tools	Application of the three criteria of generality, designer orientation, and actionability ensures usefulness of the [design for environment] guidelines for product designers across multiple domains and life-cycle stages. […] The fourth criterion–the positive imperative—focuses a designer on making positive and specific innovations, rather than correcting previous mistakes.		x	ecodesign principles and guidelines should be generic, designer oriented, actionable and feature a positive imperative			x	x		Design for Environment	x
2008	Telenko, Seepersad, Webber	NAR	A Compilation of Design for Environment Principles and Guidelines	Conference Proceeding	Proceedings of IDETC/CIE 2008	Review methods and tools	Hierarchical organization of the set into principles and guidelines further distinguishes the goals of DfE [design for environment] (principles) from actionable suggestions for achieving those goals (guidelines).	x		ecodesign principles determine goals, while ecodesign guidelines give recommendations on how to achieve these goals	x			x		Design for Environment	x
2008	Telenko, Seepersad, Webber	NAR	A Compilation of Design for Environment Principles and Guidelines	Conference Proceeding	Proceedings of IDETC/CIE 2008	Review methods and tools	[…] these principles and guidelines are formulated to be used concurrently during conceptual and embodiment design.		x	most ecodesign principles and guidelines are made to be used during conceptual and embodiment design			x	x		Design for Environment	x
2008	Telenko, Seepersad, Webber	NAR	A Compilation of Design for Environment Principles and Guidelines	Conference Proceeding	Proceedings of IDETC/CIE 2008	Review methods and tools	[...] conflicts between guidelines could be addressed in a more transparent and quantifiable way. It would be useful to study these conflicts and devise solution principles for resolving them. One readily available example is the conflict between enabling repair and upgrading and eliminating the need for replacements with a more durable innovation.		x	conflicting information between ecodesign guidelines need to be resolved			x	x		Design for Environment	x
2008	Telenko, Seepersad, Webber	NAR	A Compilation of Design for Environment Principles and Guidelines	Conference Proceeding	Proceedings of IDETC/CIE 2008	Review methods and tools	As evidenced by the plethora of published guidelines, principles, and checklists, DfE [design for environment] principles are still being discovered. Further work is needed to expand the list as new principles become available and to incorporate discoveries from other domains such as building architecture.		x	ecodesign principles are still being discovered		x				Design for Environment	x
2008	Telenko, Seepersad, Webber	NAR	A Compilation of Design for Environment Principles and Guidelines	Conference Proceeding	Proceedings of IDETC/CIE 2008	Review methods and tools	[…] the list of principles and guidelines is based on best practices, as reported in the literature, but rigorous, quantitative validation of many of these principles is still lacking.	x		ecodesign principles lack rigorous, quantitative validation			x	x		Design for Environment	x
2009	Albino, Balice, Dangelico	EU	Environmental strategies and green product development: An overview on sustainability-driven companies	Journal Publication	Business Strategy and the Environment	Identify barriers / requirements / success factors for successful ecodesign implementation	[…] more than 50% of [studied] companies develop green products […]	x		of the analysed sample, more than 50 % engage in ecodesign		x				Green Product Development	x
2009	Albino, Balice, Dangelico	EU	Environmental strategies and green product development: An overview on sustainability-driven companies	Journal Publication	Business Strategy and the Environment	Identify barriers / requirements / success factors for successful ecodesign implementation	[…] energy efficiency and the green supply chain are the most and the least adopted strategic approaches, respectively […]	x		there is still a large potential for greening the supply chain			x		x	Green Product Development	x
2009	Albino, Balice, Dangelico	EU	Environmental strategies and green product development: An overview on sustainability-driven companies	Journal Publication	Business Strategy and the Environment	Identify barriers / requirements / success factors for successful ecodesign implementation	From the geographical point of view, the percentage of European companies adopting environmental strategic approaches is above the sample average, while the percentage of Asian companies adopting environmental strategic approaches is below the sample average.	x		European companies engage in ecodesign relatively more often than Asian companies		x				Green Product Development	x
2009	Albino, Balice, Dangelico	EU	Environmental strategies and green product development: An overview on sustainability-driven companies	Journal Publication	Business Strategy and the Environment	Identify barriers / requirements / success factors for successful ecodesign implementation	[…] green product developers are supported by the adoption of environmental strategic approaches at a higher degree than green product non-developers […]	x		ecodesign efforts benefit from a supporting company sustainability strategy			x			Green Product Development	x
2009	Albino, Balice, Dangelico	EU	Environmental strategies and green product development: An overview on sustainability-driven companies	Journal Publication	Business Strategy and the Environment	Identify barriers / requirements / success factors for successful ecodesign implementation	[…] the strategic approaches adopted by green product developers depend on the sector […]	x		the ecodesign strategy of a company is sector dependent		x				Green Product Development	x
2009	Arena, Duque Ciceri, Terzi, Bengo, Azzone, Garretti	EU	A state-of-the-art of industrial sustainability: definitions, tools and metrics	Journal Publication	International Journal of Lifecycle Management	Provide a general / historical overview of the field	[…] factors such as the industry and business type could have a relevant impact on the design and implementation of any sustainability-based strategy […]	x		the sustainability strategy of a company is sector dependent		x				-	x
2009	Arena, Duque Ciceri, Terzi, Bengo, Azzone, Garretti	EU	A state-of-the-art of industrial sustainability: definitions, tools and metrics	Journal Publication	International Journal of Lifecycle Management	Provide a general / historical overview of the field	[…] future works […] could focus on the proposal of managerial tools […]		x	more managerial tools for ecodesign are needed			x	x		-	x
2009	Arena, Duque Ciceri, Terzi, Bengo, Azzone, Garretti	EU	A state-of-the-art of industrial sustainability: definitions, tools and metrics	Journal Publication	International Journal of Lifecycle Management	Provide a general / historical overview of the field	[…] many of the existing tools and models have a still limited usage among the companies […]	x		usage of ecodesign tools in companies remains limited				x		-	x
2009	Arena, Duque Ciceri, Terzi, Bengo, Azzone, Garretti	EU	A state-of-the-art of industrial sustainability: definitions, tools and metrics	Journal Publication	International Journal of Lifecycle Management	Provide a general / historical overview of the field	[...] the introduction of a new technology can change the definition of ‘what is sustainable’. For instance, a certain level of emissions, previously accepted as aligned with the so-called ‘Best Available Techniques’’ [...] can be considered as undesirable due to the availability of new, cleaner production technologies [...]	x		sustainability is a relative term subject to change	x					-	x
2009	Boks, McAloone	EU	Transitions in sustainable product design research	Journal Publication	International Journal of Product Development	Provide a general / historical overview of the field	Application of the basics of ecodesign methodology makes sense, even if the development of sustainable products is not a main concern – it is still mostly non-existent in mainstream industry today.	x		ecodesign ist still not widely implemented in companies today		x	x			Sustainable Product Design	x
2009	Boks, McAloone	EU	Transitions in sustainable product design research	Journal Publication	International Journal of Product Development	Provide a general / historical overview of the field	[opinion] awareness of the historical context and successive transitions within the field of ecodesign is a valuable asset for product designers.		x	designers would benefit from awareness of the historical context of ecodesign		x	x			Sustainable Product Design	x
2009	Coley, Lemon	EU	Exploring the design and perceived benefit of sustainable solutions: a review	Journal Publication	Journal of Engineering Design	Compare different concepts / definitions / terminology	[There is] confusion surrounding the multiple approaches to the design of more sustainable solutions due to the numerous definitions and interpretations currently being used within relevant literature.	x		multiple definitions and interpretations of ecodesign (and similar approaches) exist and cause confusion	x		x			-	x
2009	Coley, Lemon	EU	Exploring the design and perceived benefit of sustainable solutions: a review	Journal Publication	Journal of Engineering Design	Compare different concepts / definitions / terminology	[...] it is clear that there are a lot of similarities between the design approaches. Possibly the most obvious characteristic is that ultimately each approach aims to produce a more sustainable solution in the form of a product and / or service. It remains unclear, however, as to how successful each approach is at producing significantly more environmentally sustainable results. This lack of cla…	x		future research chould focus on case studies quantifying sustainability improvements from ecodesign implementation			x	x		-	x
2009	Coley, Lemon	EU	Exploring the design and perceived benefit of sustainable solutions: a review	Journal Publication	Journal of Engineering Design	Compare different concepts / definitions / terminology	[…] there does not seem to be any way to measure the environmental benefits of services in general and, even in specific cases, calculations are complex and surrounded by many uncertainties […]	x		sustainability assessment of services is currently not possible			x	x		-	x
2009	Coley, Lemon	EU	Exploring the design and perceived benefit of sustainable solutions: a review	Journal Publication	Journal of Engineering Design	Compare different concepts / definitions / terminology	Further utilisation of systemic approaches to design should place even greater emphasis on environmental concerns and again designers would benefit from tools, techniques and methods to aid them with this challenge.		x	ecodesign implementation requires appropriate methods and tools			x	x		-	x
2009	Coley, Lemon	EU	Exploring the design and perceived benefit of sustainable solutions: a review	Journal Publication	Journal of Engineering Design	Compare different concepts / definitions / terminology	It is clear that authors still recognise the role of the designer as crucial to the design, development and production of more systemic and sustainable solutions. It is also clear, however, that the integration of stakeholders from multiple disciplines is necessary to enable a more holistic and subsequently sustainable solution to be reached.		x	successful ecodesign implementation requires the integration of stakeholders from multiple disciplines			x			-	x
2009	Coley, Lemon	EU	Exploring the design and perceived benefit of sustainable solutions: a review	Journal Publication	Journal of Engineering Design	Compare different concepts / definitions / terminology	It is currently unclear what skills, abilities and experiences actors are required to draw upon […]	x		it is unclear what skills and abilities actors fostering ecodesign implementation need			x			-	x
2009	Coley, Lemon	EU	Exploring the design and perceived benefit of sustainable solutions: a review	Journal Publication	Journal of Engineering Design	Compare different concepts / definitions / terminology	[...] it has been possible to identify several attributes that are common to the design approaches explored: Focus, Design Thinking, Multiple Perspectives, Expansive Network, Collaboration, Context Expansion, Customisation and Globalisation, System Level Innovation [...]	x		all ecodesign (and comparable) approaches have the following aspects in common: Focus, Design Thinking, Multiple Perspectives, Expansive Network, Collaboration, Context Expansion, Customisation and Globalisation, System Level Innovation			x			-	x
2009	Coley, Lemon	EU	Exploring the design and perceived benefit of sustainable solutions: a review	Journal Publication	Journal of Engineering Design	Compare different concepts / definitions / terminology	The main downfall to systemic design approaches is that, although academics would like the approaches to be taken up by industry, they struggle to find the much needed demonstration projects and pilots to generate sufficient knowledge and experience […]	x		ecodesign implementation requires successful pilot projects as positive examples			x			-	x
2009	Lee-Mortimer, Short	EU	The Product Development Process Roadblock that is Restricting the Widespread Adoption of Design for Sustainability	Conference Proceeding	ICED09: 17th International Conference on Engineering Design	Identify barriers / requirements / success factors for successful ecodesign implementation	[...] in many companies the main roadblock [to adopting Design fo Sustainability [DfS] appears to be] the product development "environment" itself […] most companies seem unable to introduce DfS thinking this early [during product specification] in their product development process [...] the […] fault often lies with the "outdated" product development culture and practises (or lack of) that still…	x		outdated product development culture and practices hamper ecodesign implementation			x			Design for Sustainability	x
2009	Lee-Mortimer, Short	EU	The Product Development Process Roadblock that is Restricting the Widespread Adoption of Design for Sustainability	Conference Proceeding	ICED09: 17th International Conference on Engineering Design	Identify barriers / requirements / success factors for successful ecodesign implementation	[...] enabling the wider adoption of DfS [Design for Sustainability] is likely to require […] improving the management of product design and development […] more specifically, rather than the ongoing frustration of trying to force DfS tools and thinking into an unwilling environment, the need is to establish how to make the enviroment more accepting of DfS [...]		x	ecodesign implementation requires management of ecodesign			x			Design for Sustainability	x
2009	OECD	other	Sustainable Manufacturing and Eco-Innovation: Framework, Practices and Measurement	Report	Organisation for economic co-operation and development (OECD)	Identify barriers / requirements / success factors for successful ecodesign implementation	Practices for sustainable manufacturing have evolved […] from end-of-pipe solutions to a focus on product lifecycles and integrated environmental strategies and management systems […]	x		ecodesign has evolved from end-of-pipe solutions to integrated, multi level life cycle solutions	x	x				Eco-Innovation	x
2009	OECD	other	Sustainable Manufacturing and Eco-Innovation: Framework, Practices and Measurement	Report	Organisation for economic co-operation and development (OECD)	Identify barriers / requirements / success factors for successful ecodesign implementation	Eco-innovation seeks more radical improvements.	x		ecodesign requires radical innovation	x		x			Eco-Innovation	x
2009	OECD	other	Sustainable Manufacturing and Eco-Innovation: Framework, Practices and Measurement	Report	Organisation for economic co-operation and development (OECD)	Identify barriers / requirements / success factors for successful ecodesign implementation	Eco-innovation has three dimensions: targets, mechanisms and impacts.	x		ecodesign encompasses targets, mechanisms and impacts	x		x			Eco-Innovation	x
2009	OECD	other	Sustainable Manufacturing and Eco-Innovation: Framework, Practices and Measurement	Report	Organisation for economic co-operation and development (OECD)	Identify barriers / requirements / success factors for successful ecodesign implementation	Sustainable manufacturing calls for multi-level eco-innovations.		x	ecodesign implementation requires multi-level innovation			x			Eco-Innovation	x
2009	OECD	other	Sustainable Manufacturing and Eco-Innovation: Framework, Practices and Measurement	Report	Organisation for economic co-operation and development (OECD)	Identify barriers / requirements / success factors for successful ecodesign implementation	Current eco-innovations focus mostly on technological development but are facilitated by non-technological changes.	x		current ecodesign efforts focus mostly on technological development, but benefit from non-technological changes	x		x			Eco-Innovation	x
2009	OECD	other	Sustainable Manufacturing and Eco-Innovation: Framework, Practices and Measurement	Report	Organisation for economic co-operation and development (OECD)	Identify barriers / requirements / success factors for successful ecodesign implementation	Clear and consistent indicators are needed to accelerate corporate sustainability efforts.		x	clear and consistent indicators would benefit ecodesign implementation in companies			x			Eco-Innovation	x
2009	OECD	other	Sustainable Manufacturing and Eco-Innovation: Framework, Practices and Measurement	Report	Organisation for economic co-operation and development (OECD)	Identify barriers / requirements / success factors for successful ecodesign implementation	Improved benchmarking and better indicators would help deepen understanding of eco-innovation.		x	benchmarking and indicators would benefit understanding of ecodesign			x			Eco-Innovation	x
2009	OECD	other	Sustainable Manufacturing and Eco-Innovation: Framework, Practices and Measurement	Report	Organisation for economic co-operation and development (OECD)	Identify barriers / requirements / success factors for successful ecodesign implementation	Integration of innovation and environmental policies is crucial for promoting eco-innovation.		x	environmental and innovation policies should be integrated			x		x	Eco-Innovation	x
2009	OECD	other	Sustainable Manufacturing and Eco-Innovation: Framework, Practices and Measurement	Report	Organisation for economic co-operation and development (OECD)	Identify barriers / requirements / success factors for successful ecodesign implementation	Creating successful eco-innovation policy mixes requires understanding the interaction of supply and demand.		x	successful ecodesign policy requires understanding supply and demand			x		x	Eco-Innovation	x
2009	Sutcliffe, Maier, Moultrie, Clarkson	EU	Development of a framework for assessing sustainability in new product development	Conference Proceeding	ICED09: 17th International Conference on Engineering Design	Introduce a new framework	There is a possibility that, for a company with many products, optimising sustainability outcomes for one product could adversely affect those for another […]	x		product portfolio planning should be included in ecodesign to avoid negative trade-offs between products' environmental impacts			x			New Product Development	x
2009	Sutcliffe, Maier, Moultrie, Clarkson	EU	Development of a framework for assessing sustainability in new product development	Conference Proceeding	ICED09: 17th International Conference on Engineering Design	Introduce a new framework	[…] there is little evidence [that customers prefer to pay slightly more for a more sustainable item]	x		there is little evidence for customers' willingness to pay for green products						New Product Development	x
2009	Sutcliffe, Maier, Moultrie, Clarkson	EU	Development of a framework for assessing sustainability in new product development	Conference Proceeding	ICED09: 17th International Conference on Engineering Design	Introduce a new framework	Environmentally sustainable solutions are not always in synergy with socially sustainable solutions.	x		trade-offs between different dimensions of sustainability may arise			x			New Product Development	x
2009	Sutcliffe, Maier, Moultrie, Clarkson	EU	Development of a framework for assessing sustainability in new product development	Conference Proceeding	ICED09: 17th International Conference on Engineering Design	Introduce a new framework	[…] the designer must recognise and solve the trade-off [e.g. between environmental, social and economic sustainability] as part of the design process […]		x	solving trade-offs (e.g. between different dimensions of sustainability) is the responsibility of the designer			x			New Product Development	x
2009	Sutcliffe, Maier, Moultrie, Clarkson	EU	Development of a framework for assessing sustainability in new product development	Conference Proceeding	ICED09: 17th International Conference on Engineering Design	Introduce a new framework	[future research question] To what extent are sustainability issues in new product design being considered in firms?		x	future research should focus on current levels of ecodesign implementation in companies			x			New Product Development	x
2009	Sutcliffe, Maier, Moultrie, Clarkson	EU	Development of a framework for assessing sustainability in new product development	Conference Proceeding	ICED09: 17th International Conference on Engineering Design	Introduce a new framework	[future research question] What are the capabilities needed to develop sustainable new products, and how might such capabilities be assessed?		x	future research should focus on ecodesign capabilities			x			New Product Development	x
2010	Dusch, Crilly, Moultrie	EU	Developing a Framework for Mapping Sustainable Design Activities	Conference Proceeding	2010 Design Research Society International Conference	Introduce a new framework	[...] sustainable design may not be seen as a normal design discipline, but as an underlying notion, a philosophical approach to almost any design activity […] At the centre of attention, is the departure from the status quo towards more sustainable scenarios.		x	sustainability consideration are relevant to almost any design activity			x			Sustainable Design	x
2010	Ramani, Ramanujan, Bernstein, Zhao, Sutherland, Handwerker, Choi, Kim, Thurston	NAR	Integrated Sustainable Life Cycle Design: A Review	Journal Publication	Journal of Mechanical Design	Provide a general / historical overview of the field	Increasing the amount of research coupled with practical implications is required to make sustainable design decisions early in the product realization cycle. The early design strategy offers the highest impact on sustainability […]		x	the early stages of product development are of crucial importance for reducing a product's environmental impact			x			Integrated Sustainable Life Cycle Design	x
2010	Ramani, Ramanujan, Bernstein, Zhao, Sutherland, Handwerker, Choi, Kim, Thurston	NAR	Integrated Sustainable Life Cycle Design: A Review	Journal Publication	Journal of Mechanical Design	Provide a general / historical overview of the field	This [the notion that the early design stages offer the most potential to influence the environmental impact of a solution] is particularly important in the realm of sustainability in which regulatory policies and consumer consciousness have yet to be fully developed.	x		for sustainability considerations, regulatory policies and consumer consciousness is still in its infancy			x			Integrated Sustainable Life Cycle Design	x
2010	Ramani, Ramanujan, Bernstein, Zhao, Sutherland, Handwerker, Choi, Kim, Thurston	NAR	Integrated Sustainable Life Cycle Design: A Review	Journal Publication	Journal of Mechanical Design	Provide a general / historical overview of the field	It is also necessary to include uncertainty in assessment of these decisions supported by appropriate metrics for sustainable design decisions.		x	sustainability assessment needs to take into account uncertainty			x	x		Integrated Sustainable Life Cycle Design	x
2010	Ramani, Ramanujan, Bernstein, Zhao, Sutherland, Handwerker, Choi, Kim, Thurston	NAR	Integrated Sustainable Life Cycle Design: A Review	Journal Publication	Journal of Mechanical Design	Provide a general / historical overview of the field	Integration with product life cycle management, along with addressing interoperability in the environmental knowledge models, is needed.		x	ecodesign implementation requires integration with product life cycle management (PLM)			x	x	x	Integrated Sustainable Life Cycle Design	x
2010	Ramani, Ramanujan, Bernstein, Zhao, Sutherland, Handwerker, Choi, Kim, Thurston	NAR	Integrated Sustainable Life Cycle Design: A Review	Journal Publication	Journal of Mechanical Design	Provide a general / historical overview of the field	Providing nonintrusive interfaces for sustainable design decisions will enable the designer to interact with the knowledge models and design data as well as view data acquired from the past products. […] These varied efforts should be coupled with models and databases that can support sustainable decisions.		x	models and databases with data from past products can support ecodesign implementation			x	x		Integrated Sustainable Life Cycle Design	x
2010	Ramani, Ramanujan, Bernstein, Zhao, Sutherland, Handwerker, Choi, Kim, Thurston	NAR	Integrated Sustainable Life Cycle Design: A Review	Journal Publication	Journal of Mechanical Design	Provide a general / historical overview of the field	The lack of standards and best practices in all domains from discrete products to buildings will increase life cycle costs with regard to sustainability.	x		ecodesign implementation requires standards and best practices			x			Integrated Sustainable Life Cycle Design	x
2010	Ramani, Ramanujan, Bernstein, Zhao, Sutherland, Handwerker, Choi, Kim, Thurston	NAR	Integrated Sustainable Life Cycle Design: A Review	Journal Publication	Journal of Mechanical Design	Provide a general / historical overview of the field	To limit the environmental impact in product development, “rigorous, clearly-defined measurements are essential” […]		x	rigorous, clearly defined measurements of environmental impacts are necessary in ecodesign			x	x		Integrated Sustainable Life Cycle Design	x
2010	Ramani, Ramanujan, Bernstein, Zhao, Sutherland, Handwerker, Choi, Kim, Thurston	NAR	Integrated Sustainable Life Cycle Design: A Review	Journal Publication	Journal of Mechanical Design	Provide a general / historical overview of the field	A community-based approach combining university research, national institutes, private enterprizes, and even entrepreneurial eco-companies, together with larger enterprizes, is needed to realize sustainability.		x	ecodesign research and implementation requires cooperation among research and educational institutions as well as companies			x			Integrated Sustainable Life Cycle Design	x
2010	Ramani, Ramanujan, Bernstein, Zhao, Sutherland, Handwerker, Choi, Kim, Thurston	NAR	Integrated Sustainable Life Cycle Design: A Review	Journal Publication	Journal of Mechanical Design	Provide a general / historical overview of the field	[…] collaborations among the various disciplines of product realization (i.e., design, manufacturing supply chain, etc.) are essential to tackle this increasingly challenging task of sustainable development […]		x	ecodesign implementation requires multidisciplinary collaboration among design, manufacturing and supply chain managament			x			Integrated Sustainable Life Cycle Design	x
2010	Ramani, Ramanujan, Bernstein, Zhao, Sutherland, Handwerker, Choi, Kim, Thurston	NAR	Integrated Sustainable Life Cycle Design: A Review	Journal Publication	Journal of Mechanical Design	Provide a general / historical overview of the field	[...] research leaders must implement a complex systems approach for sustainable design decision making in product systems, in which manufacturing, global supply chain, and energy consumption are all linked. This integrative outlook on the interdependencies of these networked systems is currently outside the scope of existing engineering design and practice.		x	future research should focus on integrating the perspective of manufacturing, supply chain management and energy consumption for ecodesign (complex, networked systems approach)			x		x	Integrated Sustainable Life Cycle Design	x
2010	Rio, Reyes, Roucoules	EU	A framework for ecodesign: an interface between LCA and design process	Conference Proceeding	2010 International Conference ”Management of Technology - Step to Sustainable Production”	Introduce a new framework	Despite the number of software at each stage of the product development process, the industrial society is not integrating environment efficiently in its design process yet.	x		despite a large number of software tools available, companies are not efficiently integrating environmental considerations into their product development process (PDP)			x	x		Ecodesign	x
2010	Rio, Reyes, Roucoules	EU	A framework for ecodesign: an interface between LCA and design process	Conference Proceeding	2010 International Conference ”Management of Technology - Step to Sustainable Production”	Introduce a new framework	[…] it appears that numerical interfaces between usual design and eco-design software are needed to help the various experts involved in the design process to interact with each other […]		x	methods and tools could support interaction between experts in the ecodesign process				x		Ecodesign	x
2011	Klewitz, Hansen	EU	Sustainability-oriented innovation of SMEs: A systematic review	Conference Proceeding	22nd International Society for Professional Innovation Management (ISPIM) Conference, 2011	Introduce a new framework	In the realm of product innovation, LCA [life cycle assessment], LCC [life cycle costing] and eco-design are feasible concepts, whereas eco-efficiency, cleaner production, and EMS [environmental management systems] as well as ISO 14001/EMAS [eco-management and audit scheme] are particularly discussed within process innovations.	x		product and process innovation both have individual concepts and methods supporting ecodesign implementation				x	x	Sustainability-Oriented Innovation	x
2011	Klewitz, Hansen	EU	Sustainability-oriented innovation of SMEs: A systematic review of existing practices and actors involved	Conference Proceeding	22nd International Society for Professional Innovation Management (ISPIM) Conference, 2011	Introduce a new framework	Reactive and compliant companies are more strongly influenced through regulation from governments and authorities and innovate in the area of eco-efficiency, at best. Some of these companies also use network approaches to overcome resource constraints and to thereby engage in further SOI [sustainability oriented innovation] practices. Pro-active and innovative SMEs [small and medium sized enterpr…	x		proactive companies innovate in response to market demand, not regulation			x			Sustainability-Oriented Innovation	x
2011	Klewitz, Hansen	EU	Sustainability-oriented innovation of SMEs: A systematic review of existing practices and actors involved	Conference Proceeding	22nd International Society for Professional Innovation Management (ISPIM) Conference, 2011	Introduce a new framework	[…] innovations in the process and product realm will most likely be interrelated, i.e. a sustainable product might also influence the related production processes […]	x		product and process innovation is most likely interrelated			x		x	Sustainability-Oriented Innovation	x
2011	Klewitz, Hansen	EU	Sustainability-oriented innovation of SMEs: A systematic review of existing practices and actors involved	Conference Proceeding	22nd International Society for Professional Innovation Management (ISPIM) Conference, 2011	Introduce a new framework	Pro-active companies use collaboration with value chain partners (e.g. larger buyers) to jointly innovate on their products and processes.	x		proactive companies collaborate with partners along the value chain on product innovation			x			Sustainability-Oriented Innovation	x
2011	Klewitz, Hansen	EU	Sustainability-oriented innovation of SMEs: A systematic review of existing practices and actors involved	Conference Proceeding	22nd International Society for Professional Innovation Management (ISPIM) Conference, 2011	Introduce a new framework	Knowledge institutions such as research centers or universities play a role in our sample for either competency building or for facilitating SME [small and medium sized enterprize] specific research projects on SOIs [sustainability oriented innovations] […] collaborations with knowledge institutions might reveal to be more important than value chain partners when SMEs embark towards radical innov…	x		collaborations between companies and universities may be more beneficial for ecodesign implementation than collaboration along the value chain			x			Sustainability-Oriented Innovation	x
2011	Klewitz, Hansen	EU	Sustainability-oriented innovation of SMEs: A systematic review of existing practices and actors involved	Conference Proceeding	22nd International Society for Professional Innovation Management (ISPIM) Conference, 2011	Introduce a new framework	[…] listening too carefully to customers and other value chain partners is not always enough or can even sometimes represent a barrier towards more radical innovation […]	x		too much customer focus may hamper necessary radical innovation in ecodesign			x			Sustainability-Oriented Innovation	x
2011	Klewitz, Hansen	EU	Sustainability-oriented innovation of SMEs: A systematic review of existing practices and actors involved	Conference Proceeding	22nd International Society for Professional Innovation Management (ISPIM) Conference, 2011	Introduce a new framework	[…] move away from the discussion of resource scarcity in SMEs [small and medium sized enterprizes], as has been done extensively in literature, and strengthen research in terms of which unique characteristics of SMEs actually support the SOI [sustainability oriented innovation] process […]		x	future research should focus on benefactors supporting ecodesign implementation in small and medium sized enterprizes (SME)			x			Sustainability-Oriented Innovation	x
2011	Klewitz, Hansen	EU	Sustainability-oriented innovation of SMEs: A systematic review of existing practices and actors involved	Conference Proceeding	22nd International Society for Professional Innovation Management (ISPIM) Conference, 2011	Introduce a new framework	[...] more research is also needed into the learning process, [...] i.e. collaboration and networking. Literature indicates that such mechanisms build a learning environment for SMEs [small and medium sized enterprizes], one the one hand, and facilitate the innovation process (e.g. through resource and risk sharing), on the other [...]		x	future research should focus on collaboration and networking			x			Sustainability-Oriented Innovation	x
2011	Klewitz, Hansen	EU	Sustainability-oriented innovation of SMEs: A systematic review of existing practices and actors involved	Conference Proceeding	22nd International Society for Professional Innovation Management (ISPIM) Conference, 2011	Introduce a new framework	Maybe the key alley for future research is related to radical innovation.		x	future research should focus on radical innovation			x			Sustainability-Oriented Innovation	x
2011	Klewitz, Hansen	EU	Sustainability-oriented innovation of SMEs: A systematic review of existing practices and actors involved	Conference Proceeding	22nd International Society for Professional Innovation Management (ISPIM) Conference, 2011	Introduce a new framework	[...] the “practice” of ecopreneurship […] seem[s] to be linked to radical new ways of doing business. A fruitful avenue for further research would thus be the combination of literature on sustainable entrepreneurship and findings from this literature, to inform management and policy with regard to ‘radically greening’ more traditionally operating SMEs [small and medium sized enterprizes].		x	future research should focus on sustainable entrepreneurship			x			Sustainability-Oriented Innovation	x
2011	Soylu, Dumville	EU	Design for environment: The greening of product and supply chain	Journal Publication	Maritime Economics & Logistics	Combine two previously unrelated fields or concepts	[Green products and green supply chains] need to be run dependently and function together as a whole and are therefore essential to ultimately provide effective environmental protection […]		x	ecodesign implementation should be supported by greening of the supply chain			x		x	Design for Environment	x
2011	Soylu, Dumville	EU	Design for environment: The greening of product and supply chain	Journal Publication	Maritime Economics & Logistics	Combine two previously unrelated fields or concepts	From a practitioner point of view, lack of interaction and collaboration among multi-disciplinary teams brings a degree of risk and uncertainty, which might result in detrimentally affecting organizational sustainability […]	x		lack of interaction and cooperation in multidisciplinary teams risks ecodesign implementation			x		x	Design for Environment	x
2011	Soylu, Dumville	EU	Design for environment: The greening of product and supply chain	Journal Publication	Maritime Economics & Logistics	Combine two previously unrelated fields or concepts	[...] managers should not underestimate the importance of this issue [detrimental effects to organizational sustainability] and should prefer direct involvement at the highest levels to establish a common strategy and policy, to prepare a document outlining a specific plan for each project, and to develop procedures dealing with the communication among multi disciplinary teams [...]		x	ecodesign implementation should be supported by senior management support and a company strategy			x			Design for Environment	x
2011	Soylu, Dumville	EU	Design for environment: The greening of product and supply chain	Journal Publication	Maritime Economics & Logistics	Combine two previously unrelated fields or concepts	Practitioners should ensure that (1) various attributes of environment are assigned to the related teams, (2) the inputs and outputs of these disciplines are properly coordinated, and (3) collaborative relationships among multi-disciplinary teams are developed, (4) the interest of all disciplines in the scope is appropriately aligned, (5) a strategic partnership with suppliers is established, and…		x	success factors for ecodesign implementation are 1) role assignment, 2) coordination, 3) multidisciplinary cooperation, 4) alignment of interests, 5) strategic supplier partnerships, 6) information sharing			x		x	Design for Environment	x
2011	Soylu, Dumville	EU	Design for environment: The greening of product and supply chain	Journal Publication	Maritime Economics & Logistics	Combine two previously unrelated fields or concepts	[...] researchers are encouraged to use both qualitative and quantitative methodologies to develop and advance logistics research [...] for the four major propositions presented here. In addition, case studies are proposed to better understand the relationships between the five sub-propositions and the related disciplines [...]		x	future research should focus on using qualitative and quantitative methodologies for logistics research and engage in case studies				x	x	Design for Environment	x
2011	Val Segarra-Oña, De-Miguel-Molina, Payá-Martínez	EU	A Review Of The Literature On Eco-Design In Manufacturing Industry: Are The Institutions Focusing On The Key Aspects?	Journal Publication	Review of Business Information Systems	Identify barriers / requirements / success factors for successful ecodesign implementation	Benefits from the eco design attitude and implementation have been clearly identif[ied] in the literature review, as competitiveness improvements, cost reduction, better company image or new product development […]	x		ecodesign implementation can improve competitiveness, reduce cost, improve company image and the product development process (PDP)			x			Ecodesign	x
2011	Val Segarra-Oña, De-Miguel-Molina, Payá-Martínez	EU	A Review Of The Literature On Eco-Design In Manufacturing Industry: Are The Institutions Focusing On The Key Aspects?	Journal Publication	Review of Business Information Systems	Identify barriers / requirements / success factors for successful ecodesign implementation	[…] industry need supporting tools for achieving eco design goals […]		x	companies need methods and tools for ecodesign implementation			x	x		Ecodesign	x
2012	Birch, Hon, Short	EU	Structure and output mechanisms in Design for Environment (DfE) tools	Journal Publication	Journal of Cleaner Production	Review methods and tools	This paper has identified four output mechanisms demonstrated by the presented DfE tools. The results of these four mechanisms are linked to the performance of the tools they were identified in and were classified as either strategy-specific or product-specific	x		Ecodesign methods and tools can be categorized according to four output mechanisms						Design for Environment	x	3.5.1
2012	Birch, Hon, Short	EU	Structure and output mechanisms in Design for Environment (DfE) tools	Journal Publication	Journal of Cleaner Production	Review methods and tools	Three strategy-specific output mechanisms were identified in the majority of the tools. Output mechanism 1 was identified the most frequently and primarily in tools that performed the worst. Output mechanism 2 was identified second most frequent and in some of the better performing tools. Output mechanism 3 was only demonstrated by two of the tools that gave the best performance and consequently,…	x		The output mechanisms of ecodesign tools vary in their effectiveness				x		Design for Environment	x	3.5.2
2012	Birch, Hon, Short	EU	Structure and output mechanisms in Design for Environment (DfE) tools	Journal Publication	Journal of Cleaner Production	Review methods and tools	Although these tools can be very effective at assisting the designer towards solutions, their strategy-focused reliance could be limiting the performance.	x		The reliance of ecodesign tools on a strategy is a weakness			x	x		Design for Environment	x	3.5.2
2012	Birch, Hon, Short	EU	Structure and output mechanisms in Design for Environment (DfE) tools	Journal Publication	Journal of Cleaner Production	Review methods and tools	The product-specific mechanism has the capacity to allow for greater customisation of the outputs. Further development of the product-specific output mechanism could lead to greater improvement in the performance of DfE tool outputs. These improved outputs could result in designers minimising their product’s impact, facilitating cleaner production strategies. Future work will investigate methods …	x		Product-specific ecodesign tools have some benefits and should be improved further.				x		Design for Environment	x	3.5.2
2012	Blizzard, Klotz	NAR	A framework for sustainable whole systems design	Journal Publication	Design Studies	Introduce a new framework	[…] whole systems design has remained largely undefined and its elements ambiguous, making it a difficult design paradigm to implement […]	x		whole systems design (WSD) is largely undefined, which hinders its adoption			x		x	Whole Systems Design	x
2012	Bovea, Pérez-Belis	EU	A taxonomy of ecodesign tools for integrating environmental requirements into the product design process	Journal Publication	Journal of Cleaner Production	Review methods and tools	[…] these techniques have not been widely adopted by businesses because they are not generic and immediately applicable […]	x		ecodesign tools have not been implemented because they are not generic and immediately applicable			x	x		Ecodesign	x
2012	Bovea, Pérez-Belis	EU	A taxonomy of ecodesign tools for integrating environmental requirements into the product design process	Journal Publication	Journal of Cleaner Production	Review methods and tools	[…] despite the wide variety of tools developed for integrating the environmental aspect into the design process, its implementation is scarce and the case studies are, in many cases, theoretical examples, without the backing of a product design company [...]	x		many ecodesign tools exist, their implementation by companies remains limited			x	x		Ecodesign	x
2012	Bovea, Pérez-Belis	EU	A taxonomy of ecodesign tools for integrating environmental requirements into the product design process	Journal Publication	Journal of Cleaner Production	Review methods and tools	Most of [the tools and techniques] are not applied in a systematic way in companies due to their complexity, the time required to apply them and the lack of environmental knowledge. That is why these support tools, which are essential for the integration of environmental requirements, should be easy to use and not require too much time to be applied.	x		most ecodesign methods and tools are too complex, time and knowledge intensive			x	x		Ecodesign	x
2012	Bovea, Pérez-Belis	EU	A taxonomy of ecodesign tools for integrating environmental requirements into the product design process	Journal Publication	Journal of Cleaner Production	Review methods and tools	[...] the three key factors that should make up an ecodesign tool are: early integration of environmental aspects into the product design and development process; the life cycle approach, which takes into account how the product can affect the environment in its different stages; and a multi-criteria approach.		x	an ecodesign tool should be applicable at the early stage of the product development process (PDP), take a life cycle approach, and allow for multiple criteria			x	x		Ecodesign	x
2012	Ceschin	EU	The introduction and scaling up of sustainable Product-Service Systems A new role for strategic design for sustainability	Doctoral Thesis	Politecnico di Milano	Thesis: provide a literature review and introduce a new concept / framework / method	However, despite its sustainability potential [...] the diffusion of this business concept is still very limited. The main reason is that sustainable PSSs [product service systems] are, in most of the cases, radical innovations: innovations that challenge existing customer habits, organisational structures, and regulative frameworks.	x		sustainable product service systems (PSS) are mostly radical innovations, challenging current customer habits, organizational structures and regulation	x					Product Service Systems	x
2012	Ceschin	EU	The introduction and scaling up of sustainable Product-Service Systems A new role for strategic design for sustainability	Doctoral Thesis	Politecnico di Milano	Thesis: provide a literature review and introduce a new concept / framework / method	[…] in the literature for over a decade, not much attention has been devoted to understand how the process of introduction and scaling-up takes place and how it can be managed and oriented […]	x		introducing and scaling up sustainable product service systems (PSS) has received little attention in the literature			x			Product Service Systems	x
2012	Ceschin	EU	The introduction and scaling up of sustainable Product-Service Systems A new role for strategic design for sustainability	Doctoral Thesis	Politecnico di Milano	Thesis: provide a literature review and introduce a new concept / framework / method	[…] the process of introducing and scaling-up sustainable PSS innovations should be managed as a process in which design, development, testing and implementation are activities carried out simultaneously […]		x	introducing and scaling up sustainable product service systems (PSS) involves managing many simultaneous processes			x			Product Service Systems	x
2012	Ceschin	EU	The introduction and scaling up of sustainable Product-Service Systems A new role for strategic design for sustainability	Doctoral Thesis	Politecnico di Milano	Thesis: provide a literature review and introduce a new concept / framework / method	[...] innovative design skills are needed. Strategic designers should in fact learn to: - design a transition strategy based on the PSS concept vision; - design the actor network configurations needed to support the societal embedding process; - facilitate the build up of a shared project vision and action plan; - manage the dynamic adaptation of the societal embedding process.		x	designers of product service systems (PSS) should be involved in strategic considerations, network building, vision building and managing adaptation processes			x			Product Service Systems	x
2012	Ceschin	EU	The introduction and scaling up of sustainable Product-Service Systems A new role for strategic design for sustainability	Doctoral Thesis	Politecnico di Milano	Thesis: provide a literature review and introduce a new concept / framework / method	[...] strategic designers must know how radical innovations (and in particular sustainable PSS [product service systems] innovations) take place [and] must know the role that socio-technical experiments and niches can play in the process of introducing and scaling up radical innovations [...]		x	designers of product service systems (PSS) must be knowledgeable about radical innovation and socio-technical experiments			x			Product Service Systems	x
2012	Chiu, Chu	Asia	Review of sustainable product design from life cycle perspectives	Journal Publication	International Journal of Precision Engineering and Manufacturing	Introduce a new framework	All the works emphasized the effectiveness of early design decisions on reducing the environmental impacts induced by the later activities of a product’s life cycle.	x		the early stages of product development are of crucial importance for reducing a product's environmental impact			x			Sustainable Product Design	x
2012	Chiu, Chu	Asia	Review of sustainable product design from life cycle perspectives	Journal Publication	International Journal of Precision Engineering and Manufacturing	Introduce a new framework	A larger portion of design methods belongs to metrics-based approaches. Useful metrics derived from life cycle assessment must fit the product design process and consider uncertainty inherited from existing LCA [life cycle assessment] data.		x	useful metrics from life cycle assessment (LCA) must fit the design process and consider uncertainty			x	x		Sustainable Product Design	x
2012	Chiu, Chu	Asia	Review of sustainable product design from life cycle perspectives	Journal Publication	International Journal of Precision Engineering and Manufacturing	Introduce a new framework	Integration of CAD [computer aided design] and life cycle inventory remains ineffective and problematic. CAD systems do not support LCA [life cycle assessment] data related to processes, machines, purchasing and suppliers. Feature-based modeling represents the final form of design intent, while environmental impacts are estimated from a process perspective.	x		computer assisted design (CAD) and lif cycle assessment (LCA) do not yet work well together			x	x	x	Sustainable Product Design	x
2012	Chiu, Chu	Asia	Review of sustainable product design from life cycle perspectives	Journal Publication	International Journal of Precision Engineering and Manufacturing	Introduce a new framework	An emerging need is to develop a systematic method that can integrate the scopes of product, process, system and ecosystem, while balancing conflicting product development perspectives.		x	future research should focus on a systematic method integrating the scopes of product, process, system and ecosystem			x	x	x	Sustainable Product Design	x
2012	Chiu, Chu	Asia	Review of sustainable product design from life cycle perspectives	Journal Publication	International Journal of Precision Engineering and Manufacturing	Introduce a new framework	Product architecture has been identified as a crucial factor that connects product design to other lifecycle activities for environmental decision makings. The improvement of product sustainability by product engineering techniques such as product modularization, component reuse, and product platform is a potential research topic.		x	ecodesign could benefit from product architecture considerations such as modular product design, component reuse and product platforms			x		x	Sustainable Product Design	x
2012	Chiu, Chu	Asia	Review of sustainable product design from life cycle perspectives	Journal Publication	International Journal of Precision Engineering and Manufacturing	Introduce a new framework	The majority of the studies reviewed were conducted in developed countries. However, developing and emerging countries that consume a large fraction of energy and resources play an important role in the global supply chain. International collaborations on sustainable product development are urgent.		x	future research should focus on broadening the regional scope of ecodesign research to include developing countries			x			Sustainable Product Design	x
2012	Chiu, Chu	Asia	Review of sustainable product design from life cycle perspectives	Journal Publication	International Journal of Precision Engineering and Manufacturing	Introduce a new framework	More sustainability studies should focus on small and medium enterprizes (SME).		x	future research should focus on small and medium sized enterprizes (SME)			x			Sustainable Product Design	x
2012	Chiu, Chu	Asia	Review of sustainable product design from life cycle perspectives	Journal Publication	International Journal of Precision Engineering and Manufacturing	Introduce a new framework	Life cycle assessment should be expanded to a broader context by accounting for heterogeneous factors like economic, societal, and environmental, impacts.		x	life cycle assessment (LCA) should include economic and social factors as well				x	x	Sustainable Product Design	x
2012	Gagnon, Leduc, Savard	NAR	From a conventional to a sustainable engineering design process: different shades of sustainability	Journal Publication	Journal of Engineering Design	Introduce a new framework	[…] most reviewed SDPs [sustainable design processes] emphasise the importance of using appropriate tools, especially for the analysis of potential solutions and the synthesis of the data gathered.	x		ecodesign should be supported by appropriate methods and tools				x		Sustainable Design	x
2012	Gagnon, Leduc, Savard	NAR	From a conventional to a sustainable engineering design process: different shades of sustainability	Journal Publication	Journal of Engineering Design	Introduce a new framework	Key heterodox thinking tools emerging in the field of sustainability, which often receive less attention than analysis and synthesis tools, are also mentioned.	x		tools for heterodox thinking receive less attention				x		Sustainable Design	x
2012	Hübner	EU	Ecodesign: reach, limits and challenges 20 years of ecodesign - time for a critical reflection	Conference Proceeding	2012 Forum Ware International	Provide a general / historical overview of the field	[…] ecodesign in itself cannot guarantee that all the investments made in ecodesign will necessarily bring returns in the sense of ecological advantages […]	x		ecodesign can not guarantee environmental improvements			x			Ecodesign	x
2012	Hübner	EU	Ecodesign: reach, limits and challenges 20 years of ecodesign - time for a critical reflection	Conference Proceeding	2012 Forum Ware International	Provide a general / historical overview of the field	Ecodesign is an instrument for increasing the potential ecological performance of a product by applying specific criteria, some of them with high interrelationship. Both, the selection of the criteria and the realization of the potential ecological advantages are beyond the reach of the concept [of ecodesign]	x		ecodesign is about applying criteria, not about defining them	x		x			Ecodesign	x
2012	Hübner	EU	Ecodesign: reach, limits and challenges 20 years of ecodesign - time for a critical reflection	Conference Proceeding	2012 Forum Ware International	Provide a general / historical overview of the field	Ecodesign is an instrument, and not a strategy. It is an instrument for achieving goals which concern environmental improvements. It is not an appropriate tool for setting these goals. However, it needs to be integrated into a strategy if all its ecological advantages are to come true. The selection/application of ecodesign criteria is highly dependent on a company’s strategy and on the type of g…		x	ecodesign is about achieving environmental goals, not about setting them	x		x			Ecodesign	x
2012	Hübner	EU	Ecodesign: reach, limits and challenges 20 years of ecodesign - time for a critical reflection	Conference Proceeding	2012 Forum Ware International	Provide a general / historical overview of the field	Producing and selling an ecodesigned good is therefore important but not sufficient. Ecodesign does not compellingly lead to a sustainable use of the good in all cases.	x		ecodesign can not ensure the sustainable use of a product			x			Ecodesign	x
2012	Hübner	EU	Ecodesign: reach, limits and challenges 20 years of ecodesign - time for a critical reflection	Conference Proceeding	2012 Forum Ware International	Provide a general / historical overview of the field	[…] ecodesign needs to be integrated in a higher-level concept that offers the frame for setting goals and supporting ecodesign in achieving them […]		x	ecodesign needs to be integrated in a higher level strategic setting			x			Ecodesign	x
2012	Hübner	EU	Ecodesign: reach, limits and challenges 20 years of ecodesign - time for a critical reflection	Conference Proceeding	2012 Forum Ware International	Provide a general / historical overview of the field	[…] it is the life cycle principle as an abstract orientation and the ecodesign criteria substantiating this principle [which] form the inner logic of ecodesign […]	x		ecodesign builds on the life cycle principle	x		x			Ecodesign	x
2012	Hübner	EU	Ecodesign: reach, limits and challenges 20 years of ecodesign - time for a critical reflection	Conference Proceeding	2012 Forum Ware International	Provide a general / historical overview of the field	As many of the ecodesign criteria are not independent at all, but rather interrelate, either complementing or excluding each other, ecodesign is a permanent process of negotiating trade-offs between different types of environmental impacts.	x		ecodesign involves a trade-off between different environmental impacts			x			Ecodesign	x
2012	Hübner	EU	Ecodesign: reach, limits and challenges 20 years of ecodesign - time for a critical reflection	Conference Proceeding	2012 Forum Ware International	Provide a general / historical overview of the field	Tools such as the LCA [life cycle assessment] offer structural elements which assist designers in assessing and quantifying their assumptions. However, that does not improve the certainty of the assumptions made, especially for the use and after-use phases which depend on consumer behavior.	x		quantifying environmental impacts is complicated by uncertainties during the use and after-use phase			x	x		Ecodesign	x
2012	Hübner	EU	Ecodesign: reach, limits and challenges 20 years of ecodesign - time for a critical reflection	Conference Proceeding	2012 Forum Ware International	Provide a general / historical overview of the field	[...] there may be a difference between the distribution of ecodesign criteria in theory and practice. Around fifty percent of the ecodesign criteria listed in various guidelines relate to production, with the other half relating to the use and after-use phases. [Experience however has shown] that the criteria actually selected and applied more often relate to the use and after-use phases than to…	x		most ecodesign theory focuses on the production phase, while most ecodesign practice focuses on the use and after-use phase		x	x			Ecodesign	x
2012	Pigosso	LA	Ecodesign Maturity Model: a framework to support companies in the selection and implementation of ecodesign practices	Doctoral Thesis	University of São Paulo	Thesis: provide a literature review and introduce a new concept / framework / method	Despite the recognition of the ecodesign potential benefits, its application has not reached companies worldwide over the last years mainly due to difficulties in the management of ecodesign, which include: lack of systematization of ecodesign practices; lack of integration into the product development process, management and corporate strategy; and lack of a method to support the selection of th…	x		ecodesign implementation is hampered by a lack of ecodesign management and strategies, a lack of integration in the product development process and a lack of a method to select the most suitable ecodesign practices			x	x		Ecodesign	x
2012	Pigosso	LA	Ecodesign Maturity Model: a framework to support companies in the selection and implementation of ecodesign practices	Doctoral Thesis	University of São Paulo	Thesis: provide a literature review and introduce a new concept / framework / method	[Ecodesign] practices are presented in the literature in a fragmented and not integrated way. Additionally, there is no systematization of the ecodesign practices, indicating when and how they should be applied. This further hampers the incorporation by companies.	x		ecodesign implementation is hampered by a dispersed ecodesign literature and a lack of systematization of ecodesign practice			x			Ecodesign	x
2012	Poulikidou	EU	A literature review on methods and tools for environmentally friendly product design and development	Licentiate Thesis	Royal Institute of Technology, Stockholm	Review methods and tools	Many options of analytical tools are also available that identify specific areas and properties of the product that need to be improved although they can be considered as more demanding in regards to the environmental knowledge required or the amount of data needed to provide reliable results.	x		analytical ecodesign tools require extensive knowledge or data			x	x		Environmentally Friendly Product Design	x
2012	Poulikidou	EU	A literature review on methods and tools for environmentally friendly product design and development	Licentiate Thesis	Royal Institute of Technology, Stockholm	Review methods and tools	Many of the tools are too generic and cannot capture the increased level of details needed.	x		many ecodesign tools are too generic			x	x		Environmentally Friendly Product Design	x
2012	Poulikidou	EU	A literature review on methods and tools for environmentally friendly product design and development	Licentiate Thesis	Royal Institute of Technology, Stockholm	Review methods and tools	Life cycle assessment and various similar computer based tools minimize those limitations although other constraints such as knowledge requirements, time and cost might arise.	x		life cycle assessment (LCA) is time and cost intensive and requires extensive knowledge			x	x		Environmentally Friendly Product Design	x
2012	Poulikidou	EU	A literature review on methods and tools for environmentally friendly product design and development	Licentiate Thesis	Royal Institute of Technology, Stockholm	Review methods and tools	[…] despite the significant amount of available tools, the actual implementation level by companies seems to be low […]	x		many ecodesign tools exist, their implementation by companies remains limited			x	x		Environmentally Friendly Product Design	x
2012	Poulikidou	EU	A literature review on methods and tools for environmentally friendly product design and development	Licentiate Thesis	Royal Institute of Technology, Stockholm	Review methods and tools	Further investigation would be therefore required on how companies […] integrate environmental criteria into the product design and development stage, how familiar they are with the identified methods and tools and which ones they actually use.		x	future research should focus on how companies implement environmental criteria in product development and on companies' familiarity with and utilization of ecodesign methods and tools			x	x		Environmentally Friendly Product Design	x
2012	Poulikidou	EU	A literature review on methods and tools for environmentally friendly product design and development	Licentiate Thesis	Royal Institute of Technology, Stockholm	Review methods and tools	Additionally, to get the users perception on such methods and tools it would be very important to discuss the barriers or potentials that they see when using eco‐design methods and tools.		x	future research should focus on barriers for adopting ecodesign methods and tools			x	x		Environmentally Friendly Product Design	x
2012	Thompson	EU	Integrating a Strategic Sustainable Development Perspective in Product Service System Innovation	Doctoral Thesis	Blekinge Institute of Technology, Karlskrona	Thesis: provide a literature review and introduce a new concept / framework / method	Methods and tools for including sustainability today in product innovation working environments can be improved by including a broader life cycle perspective together with a more proactive and strategic approach that utilizes competence based on a strategic sustainability perspective.		x	ecodesign methods and tools can be improved by including a broader life cycle perspective and a proactive, strategic approach			x	x		Product Service Systems	x
2012	Thompson	EU	Integrating a Strategic Sustainable Development Perspective in Product Service System Innovation	Doctoral Thesis	Blekinge Institute of Technology, Karlskrona	Thesis: provide a literature review and introduce a new concept / framework / method	[...] there is a need to also consider other aspects within the product developing organization; specifically (1) organizational management aspects that are relevant to the entire company, (2) processes that govern how and where sustainability criteria, methods, and tools are used, and (3) the roles that people have, e.g. to ensure that someone has responsibility for sustainability aspects throug…		x	for ecodesign implementation, companies need to consider organizational management aspects, processes governing method and tool use and individual roles (environmental champion)			x	x		Product Service Systems	x
2012	Thompson	EU	Integrating a Strategic Sustainable Development Perspective in Product Service System Innovation	Doctoral Thesis	Blekinge Institute of Technology, Karlskrona	Thesis: provide a literature review and introduce a new concept / framework / method	[…] a PSS [product service systems] approach does not ensure that the result will be more sustainable solutions.	x		product service systems (PSS) are not necessarily more sustainable than products			x			Product Service Systems	x
2012	Thompson	EU	Integrating a Strategic Sustainable Development Perspective in Product Service System Innovation	Doctoral Thesis	Blekinge Institute of Technology, Karlskrona	Thesis: provide a literature review and introduce a new concept / framework / method	[…] explore how sustainability-friendly PSS [product service systems] can be considered from multiple perspectives in order to find solutions that are economically and otherwise attractive to all actors in the particular PSS network.		x	future research should focus on sustainable product service systems (PSS) which are attractive to all actors in the PSS network			x			Product Service Systems	x
2012	Thompson	EU	Integrating a Strategic Sustainable Development Perspective in Product Service System Innovation	Doctoral Thesis	Blekinge Institute of Technology, Karlskrona	Thesis: provide a literature review and introduce a new concept / framework / method	While much literature points to the opportunity that result-oriented PSS [product service systems] provide to open up to “system” level innovation, this research suggests that use-oriented PSS can also be supportive of sustainability because of the change in ownership of materials throughout the product life cycle. More evidence to enable understanding around both of these would benefit the scien…		x	future research should focus on sustainability benefits of results-oriented and use-oriented product service systems (PSS)			x			Product Service Systems	x
2013	Gaha, Benamara, Yannou	Africa	Ecodesigning with CAD features: Analysis and proposals	Journal Publication	Advances in Mechanical Engineering	Combine two previously unrelated fields or concepts	Despite the number of studies that explore CAD [computer aided design] features for ecodesigning products at each stage of the product design process, industries do not yet efficiently integrate environmental aspects in design processes.	x		implementation of computer aided design (CAD) tools for ecodesign in companies remains limited			x	x	x	Ecodesign	x
2013	Gaha, Benamara, Yannou	Africa	Ecodesigning with CAD features: Analysis and proposals	Journal Publication	Advances in Mechanical Engineering	Combine two previously unrelated fields or concepts	[…] digital tools are needed to help nonexpert environmental designers […]	x		digital tools (such as computer aided design) are needed to help nonexpert environmental designers in the ecodesign process			x	x	x	Ecodesign	x
2013	Hallstedt, Thompson, Lindahl	EU	Key elements for implementing a strategic sustainability perspective in the product innovation process	Journal Publication	Journal of Cleaner Production	Identify barriers / requirements / success factors for successful ecodesign implementation	These eight key elements [for decision-makers seeking to manage product development in a more sustainable way] are: 1) ensure organizational support from senior management; 2) efficiently bring in a sustainability perspective early in the product innovation processes; 3) utilize knowledge and experience of procurement staff in the earliest phases of the process; 4) include social aspects across t…	x		eight key elements for decision makers seeking to implement ecodesign: 1) ensure management support, 2) adopt a sustainability perspective early in the product development process (PDP), 3) utilize knowledge by procurement staff, 4) include social aspects, 5) assign responsibility for sustainability implementation, 6) knowledge sharing and competence building, 7) utilize decision making tools, 8)…			x	x		-	x
2013	Lindahl, Ekerman	EU	Structure for Categorization of EcoDesign Methods and Tools	Conference Proceeding	Proceedings of the 20th CIRP International Conference on Life Cycle Engineering	Review methods and tools	Only a few studies have been made in [the field of choosing criteria for categorizing ecodesign methods and tools], and they showed quite different results […]	x		only few and contradicting studies exist which categorize ecodesign methods and tools			x	x		Ecodesign	x
2013	Lindahl, Ekerman	EU	Structure for Categorization of EcoDesign Methods and Tools	Conference Proceeding	Proceedings of the 20th CIRP International Conference on Life Cycle Engineering	Review methods and tools	[…] most EcoDesign methods and tools are developed for the use of engineers and few tools exist for industrial designers […]	x		few ecodesign tools exist for industrial designers			x	x	x	Ecodesign	x
2013	Lindahl, Ekerman	EU	Structure for Categorization of EcoDesign Methods and Tools	Conference Proceeding	Proceedings of the 20th CIRP International Conference on Life Cycle Engineering	Review methods and tools	The most common criteria [for selecting ecodesign methods and tools] are that the methods must be useful, provide help for the user to reach the goal, and have a clearly defined purpose and measurable results. Also, it is important that the tools not are too complex and time consuming compared to the benefit.	x		the most common criteria for ecodesign methods and tools are utility, effectiveness, purpose, result, complexity and time effort				x		Ecodesign	x
2013	Lindahl, Ekerman	EU	Structure for Categorization of EcoDesign Methods and Tools	Conference Proceeding	Proceedings of the 20th CIRP International Conference on Life Cycle Engineering	Review methods and tools	[...] many of the identified EcoDesign methods and tools are derived from methods and tools used in other purposes in product development […] Those methods and tools could be easy to learn and implement if the user is already familiar with the original method.	x		ecodesign practitioners might benefit from traditional product development tools adopted for ecodesign purposes			x	x		Ecodesign	x
2013	Mattioda, Fernandes, Detro, Casela, Canciglieri Junior	LA	Principle of Triple Bottom Line in the Integrated Development of Sustainable Products	Journal Publication	Chemical Engineering Transactions	Provide a general / historical overview of the field	[…] the topic [of integrating the product development process with the Triple Bottom Line concept is] still in a discussion phase.	x		the topic of ecodesign is still in a discussion phase		x				-	x
2013	Tonelli, Evans, Taticchi	EU	Industrial sustainability: challenges, perspectives, actions	Journal Publication	International Journal of Business Inovation and Research	Identify barriers / requirements / success factors for successful ecodesign implementation	Designing products for extended life-cycles, and re-using sub-assemblies and components thanks to a distributed community for remanufacturing and recovering appears to be of crucial importance for material efficiency targets.		x	ecodesign efforts should focus on product lifetime, reuse and remanufacture			x			-	x
2013	Tonelli, Evans, Taticchi	EU	Industrial sustainability: challenges, perspectives, actions	Journal Publication	International Journal of Business Inovation and Research	Identify barriers / requirements / success factors for successful ecodesign implementation	On the organisational side, the vertical integration of secondary value stages and/or the creation of strategic partnerships within global and local supply networks – with reverse flows and value recovery activities – are required conditions to guarantee the feasibility of a sustainable model.		x	ecodesign implementation requires cooperation along the supply chain			x		x	-	x
2013	Tonelli, Evans, Taticchi	EU	Industrial sustainability: challenges, perspectives, actions	Journal Publication	International Journal of Business Inovation and Research	Identify barriers / requirements / success factors for successful ecodesign implementation	A first enabling step would be for industry, government and academia to cooperate in the development of a common definition of industrial sustainability and sustainable manufacturing as well as a common way to assess and reward sustainable industrial practices. Such a vision would not be prescriptive in setting out precisely how each component of the industrial system should work in the future, i…		x	there is a need for a common definition of industrial sustainability among companies, researchers and government	x		x			-	x
2013	Tonelli, Evans, Taticchi	EU	Industrial sustainability: challenges, perspectives, actions	Journal Publication	International Journal of Business Inovation and Research	Identify barriers / requirements / success factors for successful ecodesign implementation	[...] academia must improve its understanding of how industry impacts the ecosystem, must seek out new collaborators in a deliberate programme of problem-solving research and education, must explore a variety of new mental models to describe the industrial system and must collectively gather and learn from practice.		x	future research should focus on understanding industry-environment relationships, collaboration, new mental models and learning from practice			x			-	x
2013	Zhang, Rio, Allais, Zwolinski, Reyes Carrillo, Roucoules, Mercier-Laurent, Buclet	EU	Toward an systemic navigation framework to integrate sustainable development into the company	Journal Publication	Journal of Cleaner Production	Introduce a new framework	[…] a better circulation between the different functions [strategic, tactical, operational] in company could improve the integration of sustainable issues […]		x	ecodesign implementation in companies benefits from communication and cooperation between the strategic, tactical and operational level			x			Ecodesign	x
2013	Zhang, Rio, Allais, Zwolinski, Reyes Carrillo, Roucoules, Mercier-Laurent, Buclet	EU	Toward an systemic navigation framework to integrate sustainable development into the company	Journal Publication	Journal of Cleaner Production	Introduce a new framework	Many authors […] point out the need to establish a systemic perspective in order to improve the integration of sustainable issues into all company activities: from strategic decision-making to the end of the project.		x	ecodesign implementation requires a systemic perspective			x			Ecodesign	x
2013	Zhang, Rio, Allais, Zwolinski, Reyes Carrillo, Roucoules, Mercier-Laurent, Buclet	EU	Toward an systemic navigation framework to integrate sustainable development into the company	Journal Publication	Journal of Cleaner Production	Introduce a new framework	[…] companies need to reinforce the relationship between general corporate development and eco-design activities.		x	ecodesign implementation needs to be accompanied by strategic and managerial support			x			Ecodesign	x
2014	Baouch, Pourroy, Zwolinski, Brissaud	EU	Identifying the Requirements for a Knowledge-sharing Platform in Ecodesign	Conference Proceeding	Proceedings of the 24th CIRP Design Conference, 2014	Identify barriers / requirements / success factors for successful ecodesign implementation	Facing new environmental regulations and public pressure, many companies adopt an ecodesign approach.	x		environmental regulation pressures companies to implement ecodesign			x			Ecodesign	x
2014	Baouch, Pourroy, Zwolinski, Brissaud	EU	Identifying the Requirements for a Knowledge-sharing Platform in Ecodesign	Conference Proceeding	Proceedings of the 24th CIRP Design Conference, 2015	Identify barriers / requirements / success factors for successful ecodesign implementation	[…] there are still difficulties to integrate ecodesign tools and methods in the already complex product’s development process.	x		the implementation of ecodesign tools by companies remains limited			x	x		Ecodesign	x
2014	Bocken, Short, Rana, Evans	EU	A literature and practice review to develop sustainable business model archetypes	Journal Publication	Journal of Cleaner Production	Introduce a new framework	The [sustainable business model] archetypes aim to: Categorise and explain business model innovations for sustainability; Provide mechanisms to assist the innovation process for embedding sustainability in business models (e.g. through case studies and workshops); Define a clearer research agenda for business models for sustainability; and Provide exemplars for businesses to de-risk the SBM [sust…	x		sustainable business model archetypes can support research, innovation and implementation of these business models			x	x	x	Sustainable Business Models	x
2014	Bocken, Short, Rana, Evans	EU	A literature and practice review to develop sustainable business model archetypes	Journal Publication	Journal of Cleaner Production	Introduce a new framework	The eight [sustainable business model] archetypes developed are: 1. Maximise material and energy efficiency 2. Create value from ‘waste’ 3. Substitute with renewables and natural processes 4. Deliver functionality, rather than ownership 5. Adopt a stewardship role 6. Encourage sufficiency 7. Re-purpose the business for society/environment 8. Develop scale-up solutions	x		sustainable business models can be described by eight archetypes			x	x	x	Sustainable Business Models	x
2014	Brones, de Carvalho, de Senzi Zancul	LA	Ecodesign in project management: a missing link for the integration of sustainability in product development?	Journal Publication	Journal of Cleaner Production	Combine two previously unrelated fields or concepts	[...] project management concepts and practices applied to the context of considering environmental sustainability in product development (ecodesign) have been reported only incipiently in scientific papers […] it can be concluded that a gap exists between the two areas of knowledge discussed in this work, i.e., project management and ecodesign.	x		little research exists on the connection of ecodesign and project management			x		x	Ecodesign	x
2014	Brones, de Carvalho, de Senzi Zancul	LA	Ecodesign in project management: a missing link for the integration of sustainability in product development?	Journal Publication	Journal of Cleaner Production	Combine two previously unrelated fields or concepts	[…] the main research and practices observed in ecodesign […] have focused primarily on technical aspects and tools and secondarily on certain issues related to company strategy and management […]	x		most ecodesign research and practices neglects company strategy and management			x			Ecodesign	x
2014	Brones, de Carvalho, de Senzi Zancul	LA	Ecodesign in project management: a missing link for the integration of sustainability in product development?	Journal Publication	Journal of Cleaner Production	Combine two previously unrelated fields or concepts	The lack of [project management] guidelines can be presumed as a limiting factor for projects and companies that attempt to consider environmental aspects as a performance factor expected for their activities.	x		lack of project management guidelines limits ecodesign implementation in companies			x		x	Ecodesign	x
2014	Brones, de Carvalho, de Senzi Zancul	LA	Ecodesign in project management: a missing link for the integration of sustainability in product development?	Journal Publication	Journal of Cleaner Production	Combine two previously unrelated fields or concepts	[...] additional research would be helpful to explore and define the relevant variables for ecodesign-oriented project management and to attempt to visualise how such an extended project management approach could improve the environmental performance of product development [...]		x	future research should focus on the connection of ecodesign and project management			x		x	Ecodesign	x
2014	de Medeiros, Ribeiro, Cortimiglia	LA	Success factors for environmentally sustainable product innovation: a systematic literature review	Journal Publication	Journal of Cleaner Production	Identify barriers / requirements / success factors for successful ecodesign implementation	[...] current studies do not explicitly consider environmentally responsible customers’ willingness to pay for green products. Therefore there is a clear gap for research on the issue of price elasticity versus value perception of environmentally sustainable products. Another gap in current research on environmentally sustainable product innovation regards consumers’ decision making processes whe…		x	future research should focus on customers' willingness to pay for green products			x			Environmentally Sustainable Product Innovation	x
2014	de Medeiros, Ribeiro, Cortimiglia	LA	Success factors for environmentally sustainable product innovation: a systematic literature review	Journal Publication	Journal of Cleaner Production	Identify barriers / requirements / success factors for successful ecodesign implementation	[Although] current research has identified a number of drivers of environmentally responsible firm behavior (e.g., appropriate organizational culture, management proactivity and involvement in environmentally sustainable innovation, and market orientation), there is still much to investigate regarding how these drivers effectively work.		x	there is still a lack of knowledge on how drivers of environmentally responsible companies work			x			Environmentally Sustainable Product Innovation	x
2014	de Medeiros, Ribeiro, Cortimiglia	LA	Success factors for environmentally sustainable product innovation: a systematic literature review	Journal Publication	Journal of Cleaner Production	Identify barriers / requirements / success factors for successful ecodesign implementation	A main contribution for future research in this area [methods for the development of sustainable innovation] should be towards systematizing the diverse proposals in a consolidated model for environmentally sustainable product innovation development. This gap is particularly important for the service sector, since most of the methods already proposed originate from the manufacturing context.		x	future research should focus on devloping a consolidated model for ecodesign and apply it to service development			x			Environmentally Sustainable Product Innovation	x
2014	de Medeiros, Ribeiro, Cortimiglia	LA	Success factors for environmentally sustainable product innovation: a systematic literature review	Journal Publication	Journal of Cleaner Production	Identify barriers / requirements / success factors for successful ecodesign implementation	Research in this area [effects of sustainable innovation in firm competitiveness and performance] could involve understanding the effects of and the interrelationships among the critical success factors for environmentally sustainable product innovation mapped in this paper. Such an understanding could then be applied to establish the relationship between success of environmentally sustainable pr…		x	future research should focus on success factors for ecodesign implementation			x			Environmentally Sustainable Product Innovation	x
2014	de Medeiros, Ribeiro, Cortimiglia	LA	Success factors for environmentally sustainable product innovation: a systematic literature review	Journal Publication	Journal of Cleaner Production	Identify barriers / requirements / success factors for successful ecodesign implementation	New research in this area [the impact of interfunctional collaboration in green product development and market performance of environmentally sustainable product innovation] could encompass measuring to what extent the integration between distinct functional areas within an organization effectively impacts the market performance of environmentally sustainable innovation. Moreover, given that requ…		x	future research should focus on interfunctional collaboration in ecodesign implementation			x			Environmentally Sustainable Product Innovation	x
2014	de Medeiros, Ribeiro, Cortimiglia	LA	Success factors for environmentally sustainable product innovation: a systematic literature review	Journal Publication	Journal of Cleaner Production	Identify barriers / requirements / success factors for successful ecodesign implementation	[…] further studies are still necessary to draw up a proper systematic perspective from micro issues, such as engineering and strategy, and macro issues such as public policies, technology and social behaviors.		x	future research should focus on a systematic perspective combining macro and micro issues			x			Environmentally Sustainable Product Innovation	x
2014	de Medeiros, Ribeiro, Cortimiglia	LA	Success factors for environmentally sustainable product innovation: a systematic literature review	Journal Publication	Journal of Cleaner Production	Identify barriers / requirements / success factors for successful ecodesign implementation	[…] critical success factors for environmentally sustainable innovation […] can be subsumed into four groups: (i) market, law and regulation knowledge; (ii) interfunctional collaboration; (iii) innovation-oriented learning; and (iv) R&D [research & development] investments.	x		ecodesign success factors can be categorized as (i) market, law and regulation knowledge; (ii) interfunctional collaboration; (iii) innovation-oriented learning; and (iv) R&D [research & development] investments.			x			Environmentally Sustainable Product Innovation	x
2014	de Medeiros, Ribeiro, Cortimiglia	LA	Success factors for environmentally sustainable product innovation: a systematic literature review	Journal Publication	Journal of Cleaner Production	Identify barriers / requirements / success factors for successful ecodesign implementation	The marketing, law and legislation knowledge critical success factor includes, basically, the fulfillment of buyers’ and society’s expectations - covering the drivers for green product consumption - as well as intelligence about competitors’ actions and the knowledge about applicable environmental legislation and regu- lation.	x		knowledge about marketing, law and competition are important ecodesign success factors			x			Environmentally Sustainable Product Innovation	x
2014	de Medeiros, Ribeiro, Cortimiglia	LA	Success factors for environmentally sustainable product innovation: a systematic literature review	Journal Publication	Journal of Cleaner Production	Identify barriers / requirements / success factors for successful ecodesign implementation	[...] the interfunctional collaboration critical success factor involves the adoption of a systemic view of sustainable innovation by the firm, which includes the integration of different stakeholders (both internal and external) in the product development process.	x		a systemic perspective of sustainability is an important ecodesign success factor			x			Environmentally Sustainable Product Innovation	x
2014	de Medeiros, Ribeiro, Cortimiglia	LA	Success factors for environmentally sustainable product innovation: a systematic literature review	Journal Publication	Journal of Cleaner Production	Identify barriers / requirements / success factors for successful ecodesign implementation	The innovation-oriented learning critical success factor [...] refers to the organizational capability for discontinuing processes identified as obsolete. It involves the elimination of cultural barriers that hinder change within the organization, the development of a set of green competences, the development of the capacity for critical reflective analysis by the managers and decision makers and…	x		innovation-oriented learning is an important ecodesign success factor			x			Environmentally Sustainable Product Innovation	x
2014	de Medeiros, Ribeiro, Cortimiglia	LA	Success factors for environmentally sustainable product innovation: a systematic literature review	Journal Publication	Journal of Cleaner Production	Identify barriers / requirements / success factors for successful ecodesign implementation	Finally, R&D [research & development] investments critical success factor comprises variables related to investments in research, infrastructure and specialized human resources necessary to employ greener technologies and to achieve superior market performance, given legal constraints and buyer expectations.	x		investment in research and development, infrastructure and human resources are important ecodesign success factors			x			Environmentally Sustainable Product Innovation	x
2014	de Medeiros, Ribeiro, Cortimiglia	LA	Success factors for environmentally sustainable product innovation: a systematic literature review	Journal Publication	Journal of Cleaner Production	Identify barriers / requirements / success factors for successful ecodesign implementation	[...] in environmentally sustainable product innovation, besides knowledge of customers and competitors, it is stressed the need of knowing regulation and environmental laws as well as policies concerning financial and information incentives oriented to green innovation practices [...]	x		knowledge of environmental and innovation policy and regulation is crucial to successful ecodesign implementation			x			Environmentally Sustainable Product Innovation	x
2014	de Medeiros, Ribeiro, Cortimiglia	LA	Success factors for environmentally sustainable product innovation: a systematic literature review	Journal Publication	Journal of Cleaner Production	Identify barriers / requirements / success factors for successful ecodesign implementation	[…] regarding the R&D [research & development] investments factor, the adoption of appropriate methods for developing environmentally sustainable products, as well as research in cleaner technologies, are important variables for innovation success […]	x		adopting appropriate methods and tools for ecodesign and research in cleaner technologies are important ecodesign success factors			x	x		Environmentally Sustainable Product Innovation	x
2014	de Medeiros, Ribeiro, Cortimiglia	LA	Success factors for environmentally sustainable product innovation: a systematic literature review	Journal Publication	Journal of Cleaner Production	Identify barriers / requirements / success factors for successful ecodesign implementation	[…] the innovation-oriented learning is a factor specific for the success of environmentally sustainable products […]	x		innovation-oriented learning is a success factor specific to ecodesign			x			Environmentally Sustainable Product Innovation	x
2014	de Medeiros, Ribeiro, Cortimiglia	LA	Success factors for environmentally sustainable product innovation: a systematic literature review	Journal Publication	Journal of Cleaner Production	Identify barriers / requirements / success factors for successful ecodesign implementation	Finally, as the vast majority of the reviewed research was originated in North America, Europe and Asia, it should be pointed out that there is ample margin for extending the research to other parts of the world.		x	future research should focus on broadening the regional scope of ecodesign research to include developing countries			x			Environmentally Sustainable Product Innovation	x
2014	de Medeiros, Ribeiro, Cortimiglia	LA	Success factors for environmentally sustainable product innovation: a systematic literature review	Journal Publication	Journal of Cleaner Production	Identify barriers / requirements / success factors for successful ecodesign implementation	Another venue for further research along this topic would be to test and validate the set of critical success factors identified in this systematic literature review through empirical research.		x	future research should focus on testing and validating identified success factors for ecodesign implementation			x			Environmentally Sustainable Product Innovation	x
2014	Dunmade	NAR	Issues in the sustainability of products designed for multi-lifecycle	Journal Publication	International Journal of Engineering & Technology	Combine two previously unrelated fields or concepts	[...] technical issues like technological changes, availability of spare parts, and ability to maintain product structural integrity [affect sustainability of products designed for multi-lifecycle, as do] changes in consumer tastes and changes in regulations [...] if designers can bear in mind the probability of [technological and other] changes happening, he/she would be more innovative in desig…	x		modular product design for sustainability efforts need to be flexible and consider technological and behavioral changes			x		x	-	x
2014	Gremyr, Siva, Raharjo, Goh	EU	Adapting the Robust Design Methodology to support sustainable product development	Journal Publication	Journal of Cleaner Production	Combine two previously unrelated fields or concepts	RDM [robust design methodology] can integrate sustainability considerations throughout the product development processes […]	x		robust design methodology can be used to include sustainability considerations				x	x	Sustainable Product Development	x
2014	Gremyr, Siva, Raharjo, Goh	EU	Adapting the Robust Design Methodology to support sustainable product development	Journal Publication	Journal of Cleaner Production	Combine two previously unrelated fields or concepts	RDM [robust design methodology] has potential to contribute to all lifecycle stages. However, in order to exploit this potential a number of adaptations are needed. It is important to have a broader view on the NFs [noise factors] and not limit these to an individual customer's use of the product. Further, more focus is needed on the early product development phases, which will require the applic…		x	robust design methodology tools have to be adapted to include sustainability considerations			x	x	x	Sustainable Product Development	x
2014	Johansson, Sundin	EU	Lean and green product development: Two sides of the same coin?	Journal Publication	Journal of Cleaner Production	Combine two previously unrelated fields or concepts	A number of similarities between the concepts [lean and green product development] were found. For example, implementation of both concepts calls for a systems perspective where the dimensions of process-people-tools/techniques are linked holistically.	x		lean and green product development share a systems perpective			x		x	Green Product Development	x
2014	Johansson, Sundin	EU	Lean and green product development: Two sides of the same coin?	Journal Publication	Journal of Cleaner Production	Combine two previously unrelated fields or concepts	Differences between the LPD [lean product development] and GPD [green product development] concepts lie in: their goal and focus, value construct, process structure, performance metrics, and tools/techniques used.	x		lean and green product development differ in their goal and focus, value construct, process structure, performance metrics and tools used				x	x	Green Product Development	x
2014	Johansson, Sundin	EU	Lean and green product development: Two sides of the same coin?	Journal Publication	Journal of Cleaner Production	Combine two previously unrelated fields or concepts	[…] it cannot be argued […] that LPD [lean product development] automatically leads to greener products or that GPD [green product development] ensures improvements and efficiency in the product development process […]	x		lean and green product development are not logical antecedents and successors of one another					x	Green Product Development	x
2014	Johansson, Sundin	EU	Lean and green product development: Two sides of the same coin?	Journal Publication	Journal of Cleaner Production	Combine two previously unrelated fields or concepts	[…] there is potential for cross-field learning between the LPD [lean product development] and GPD [green product development] fields. Therefore, future research should adopt a more integrated approach to study LPD and GPD. […] it would be valuable to study in more detail what the LPD and GPD research fields can learn fromeach other, and if an integrated concept that includes both the LPD and GPD…		x	there is potential for mutual learning and benefits among lean and green product development			x		x	Green Product Development	x
2014	Johansson, Sundin	EU	Lean and green product development: Two sides of the same coin?	Journal Publication	Journal of Cleaner Production	Combine two previously unrelated fields or concepts	From an industrial practice perspective, it would definitely be beneficial if the concepts could be merged. Companies could then avoid the drawback of implementing two “new” concepts in the product development organisation. Instead, one integrated concept could be implemented where both lean and green issues are considered.		x	ecodesign implementation in companies would benefit of a merged concept of lean and green product development			x		x	Green Product Development	x
2014	Klewitz, Hansen	EU	Sustainability-oriented innovation of SMEs: a systematic review	Journal Publication	Journal of Cleaner Production	Introduce a new framework	SME [small and medium sized enterprize] strategic sustainability behavior ranges from resistant, reactive, anticipatory, and innovation-based to sustainability-rooted […]	x		small and medium sized enterprizes (SME) differ in their proactivity and orientation towards innovation and sustainability			x			Sustainability-Oriented Innovation	x
2014	Klewitz, Hansen	EU	Sustainability-oriented innovation of SMEs: a systematic review	Journal Publication	Journal of Cleaner Production	Introduce a new framework	[…] innovation practices [can refer to] the product, process, and organizational level […]	x		innovation can refer to products, processes and organizations	x					Sustainability-Oriented Innovation	x
2014	Klewitz, Hansen	EU	Sustainability-oriented innovation of SMEs: a systematic review	Journal Publication	Journal of Cleaner Production	Introduce a new framework	[…] research is still strong on eco-innovation rather than on innovation from a triple bottom line perspective […]	x		little research exists on implementing all three dimensions of sustainability into ecodesign			x			Sustainability-Oriented Innovation	x
2014	Klewitz, Hansen	EU	Sustainability-oriented innovation of SMEs: a systematic review	Journal Publication	Journal of Cleaner Production	Introduce a new framework	[…] the more proactive SME [small and medium sized enterprize] behaviors […] possess higher capabilities for more radical SOIs [sustainability oriented innovations] with the innovation process itself changing […]	x		more proactive small and medium sized enterprizes (SME) possess higher capabilities for radical ecodesign			x			Sustainability-Oriented Innovation	x
2014	Klewitz, Hansen	EU	Sustainability-oriented innovation of SMEs: a systematic review	Journal Publication	Journal of Cleaner Production	Introduce a new framework	[…] interaction with external actors (e.g. customers, authorities, research institutes) can ultimately increase the innovative capacity of SMEs [small and medium sized enterprizes] for SOIs [sustainability oriented innovations] […]	x		interaction with external actors can increase ecodesign capacities of small and medium sized enterprizes (SME)			x			Sustainability-Oriented Innovation	x
2014	Klewitz, Hansen	EU	Sustainability-oriented innovation of SMEs: a systematic review	Journal Publication	Journal of Cleaner Production	Introduce a new framework	[...] major research gaps with regard to radical SOIs, streamlined innovation methods, the role of SMEs [small and medium sized enterprizes] in industry transformation and in sustainable supply chains, as well as a need for a stronger theoretical debate on SOIs [sustainability oriented innovations] of SMEs.		x	future research should focus on radical ecodesign, streamlined methods and tools, the role of small and medium sized enterprizes (SME) in transforming their industry and the theory on ecodesign in SME			x	x		Sustainability-Oriented Innovation	x
2014	Mattioda, Canciglieri Junior, Fernandes, Casela, Mazzi	LA	Thoughts on Product Development Oriented to Sustainability in Organizational Overview	Journal Publication	Advanced Materials Research	Identify barriers / requirements / success factors for successful ecodesign implementation	[...] despite the discourse on sustainable development already appear in the 80s, these considerations in relation to product development is still present in embryonic form. […] The subject presents itself very fragmented and does not acknowledge the existence of a concept of PDP [product development process] which is characterized as a universal model.	x		a universal model of an ecodesign product development process (PDP) is lacking	x		x			Product Development Oriented to Sustainability	x
2014	Mattioda, Canciglieri Junior, Fernandes, Casela, Mazzi	LA	Thoughts on Product Development Oriented to Sustainability in Organizational Overview	Journal Publication	Advanced Materials Research	Identify barriers / requirements / success factors for successful ecodesign implementation	There is a concentration of the sustainability approach in phases related to informational design and conceptual design […]	x		ecodesign efforts mostly concentrate on the informational and conceptual design stage				x		Product Development Oriented to Sustainability	x
2014	Mattioda, Canciglieri Junior, Fernandes, Casela, Mazzi	LA	Thoughts on Product Development Oriented to Sustainability in Organizational Overview	Journal Publication	Advanced Materials Research	Identify barriers / requirements / success factors for successful ecodesign implementation	[…] operations at the strategic level within companies appears as essential […]	x		strategic support benefits ecodesign implementation in companies			x			Product Development Oriented to Sustainability	x
2014	Mattioda, Canciglieri Junior, Fernandes, Casela, Mazzi	LA	Thoughts on Product Development Oriented to Sustainability in Organizational Overview	Journal Publication	Advanced Materials Research	Identify barriers / requirements / success factors for successful ecodesign implementation	The use of tools for ecodesign seems to be the solution to traditional development models; however the use of tools is seen by many authors as a barrier to be overcome. The principal contradiction on using these tools is that most of them require a lot of information about the product and its process, as counterpoint, to its actual efficiency within the development process should be used in initi…	x		a central contradiction of ecodesign tools and methods is that they should be used early on in the product development process (PDP), but they require input data which is not available until much later			x	x		Product Development Oriented to Sustainability	x
2014	Mattioda, Canciglieri Junior, Fernandes, Casela, Mazzi	LA	Thoughts on Product Development Oriented to Sustainability in Organizational Overview	Journal Publication	Advanced Materials Research	Identify barriers / requirements / success factors for successful ecodesign implementation	The main difficulties in relation to the development of sustainable products seems to be still how to integrate in projects the three pillars of sustainability [..] approaches of social requirements are [little] discussed […]	x		currently, the social dimension of sustainability is under-addressed in ecodesign			x			Product Development Oriented to Sustainability	x
2014	O'Hare, McAloone	EU	Eco-Innovation: The Opportunities for Engineering Design Research	Conference Proceeding	International Design Conference - Design 2014	Identify barriers / requirements / success factors for successful ecodesign implementation	A widely accepted typology of approaches to environmental product design [is required].		x	future research should focus on developing a widely accepted typology of approaches to developing sustainable products (and services)	x		x			Eco-Innovation	x
2014	O'Hare, McAloone	EU	Eco-Innovation: The Opportunities for Engineering Design Research	Conference Proceeding	International Design Conference - Design 2014	Identify barriers / requirements / success factors for successful ecodesign implementation	A comprehensive and rigorous review of tools to support eco-innovation [is required].		x	future research should focus on reviewing ecodesign methods and tools			x	x		Eco-Innovation	x
2014	O'Hare, McAloone	EU	Eco-Innovation: The Opportunities for Engineering Design Research	Conference Proceeding	International Design Conference - Design 2014	Identify barriers / requirements / success factors for successful ecodesign implementation	Guidance on when and where eco-innovation is relevant [is required] – The literature suggests that the level of environmental ambition, skills, knowledge and resources required for eco-innovation mean that it is not suitable for all companies, or for all product development projects.		x	future research should focus on the necessary prerequisites in a company for successful ecodesign implementation			x			Eco-Innovation	x
2014	O'Hare, McAloone	EU	Eco-Innovation: The Opportunities for Engineering Design Research	Conference Proceeding	International Design Conference - Design 2014	Identify barriers / requirements / success factors for successful ecodesign implementation	Collaborative research at the interfaces [is required] – the literature reviewed provided few examples of collaboration across the domains of engineering design, management and strategy, and environmental science.		x	future research should focus on multidisciplinary research cooperation			x			Eco-Innovation	x
2014	O'Hare, McAloone	EU	Eco-Innovation: The Opportunities for Engineering Design Research	Conference Proceeding	International Design Conference - Design 2014	Identify barriers / requirements / success factors for successful ecodesign implementation	Studies of eco-innovation implementation [are required].		x	there should be more studies on ecodesign implementation			x			Eco-Innovation	x
2014	O'Hare, McAloone	EU	Eco-Innovation: The Opportunities for Engineering Design Research	Conference Proceeding	International Design Conference - Design 2014	Identify barriers / requirements / success factors for successful ecodesign implementation	Greater reporting of case studies of failures [is required].		x	there should be more reporting of case study failures			x			Eco-Innovation	x
2014	O'Hare, McAloone	EU	Eco-Innovation: The Opportunities for Engineering Design Research	Conference Proceeding	International Design Conference - Design 2014	Identify barriers / requirements / success factors for successful ecodesign implementation	Methodological innovation [is required] – the management literature has provided some interesting examples of methodological approaches to the study of eco-innovation that are not widely used in engineering design research.		x	ecodesign implementation could benefit from established management research methodology			x	x	x	Eco-Innovation	x
2014	O'Hare, McAloone	EU	Eco-Innovation: The Opportunities for Engineering Design Research	Conference Proceeding	International Design Conference - Design 2014	Identify barriers / requirements / success factors for successful ecodesign implementation	Bringing design thinking to business model innovation [is required].		x	future research should focus on business models for ecodesigned products			x		x	Eco-Innovation	x
2014	O'Hare, McAloone	EU	Eco-Innovation: The Opportunities for Engineering Design Research	Conference Proceeding	International Design Conference - Design 2014	Identify barriers / requirements / success factors for successful ecodesign implementation	Understanding the role of LCA [life cycle assessment] in supporting eco-innovative product development [is required…] there is still uncertainty concerning who, when and how such tools can be applied to greatest effect.		x	future research should focus on clarifying the role of life cycle assessment (LCA) in supporting ecodesign implementation			x	x		Eco-Innovation	x
2014	O'Hare, McAloone	EU	Eco-Innovation: The Opportunities for Engineering Design Research	Conference Proceeding	International Design Conference - Design 2014	Identify barriers / requirements / success factors for successful ecodesign implementation	Development of an interface with policy research [is required...] Policy makers are an important audience for industry as they determine the environmental regulations that the companies will have to meet, and they are an important audience for the engineering design research community as they dictate research funding priorities.		x	there should be more engagement with policy research and policy makers			x			Eco-Innovation	x
2015	Blok, Long, Gaziulusoy, Ciliz, Lozano, Huisingh, Csutora, Boks	EU	From best practices to bridges for a more sustainable future: Advances and challenges in the transition to global sustainable production and consumption	Journal Publication	Journal of Cleaner Production	Identify barriers / requirements / success factors for successful ecodesign implementation	It [is] easier to find examples of progress on the production side, than on the consumption side. […] Both within this stream of the SV [special volume], and in the wider discourse on sustainability, consumption and the roles of behaviour are increasingly recognised as important considerations for achieving sustainable outcomes. This can also be seen in terms of policies and regulations, traditio…	x		more progress can be observed on the production than on the consumption side		x				-	x
2015	Blok, Long, Gaziulusoy, Ciliz, Lozano, Huisingh, Csutora, Boks	EU	From best practices to bridges for a more sustainable future: Advances and challenges in the transition to global sustainable production and consumption	Journal Publication	Journal of Cleaner Production	Identify barriers / requirements / success factors for successful ecodesign implementation	[…] although CSR [corporate social responsibility] has entered mainstream business activities, the next step is ensuring that sustainability is not just an ‘add-on’ but fully integrated and connected to how businesses operate. Business model approaches and concepts can be conceived as this next step, which may potentially lead to the fundamental redesign of how businesses and organisations operat…		x	future research should focus on business models for ecodesigned products			x		x	-	x
2015	Blok, Long, Gaziulusoy, Ciliz, Lozano, Huisingh, Csutora, Boks	EU	From best practices to bridges for a more sustainable future: Advances and challenges in the transition to global sustainable production and consumption	Journal Publication	Journal of Cleaner Production	Identify barriers / requirements / success factors for successful ecodesign implementation	Due to the multiple objectives that must be satisfied to move towards more sustainable futures, ‘win-win-win-win’ outcomes, covering economic, environmental, social and time dimensions, are required.		x	future research should focus on solutions that address all three dimensions of sustainability			x			-	x
2015	Blok, Long, Gaziulusoy, Ciliz, Lozano, Huisingh, Csutora, Boks	EU	From best practices to bridges for a more sustainable future: Advances and challenges in the transition to global sustainable production and consumption	Journal Publication	Journal of Cleaner Production	Identify barriers / requirements / success factors for successful ecodesign implementation	These [solutions] will be based upon better understanding of key drivers and barriers to sustainable production and consumption. For instance, what is the appropriate balancing of drivers, such as economic policies and incentives, more traditional governmental approaches or more novel methods emanating from disciplines such as behavioural economics? And, how well can such methods transcend cultur…		x	future research should focus on economic policies and cultural aspects			x			-	x
2015	Blok, Long, Gaziulusoy, Ciliz, Lozano, Huisingh, Csutora, Boks	EU	From best practices to bridges for a more sustainable future: Advances and challenges in the transition to global sustainable production and consumption	Journal Publication	Journal of Cleaner Production	Identify barriers / requirements / success factors for successful ecodesign implementation	[There is an] urgent need to develop, test and implement methods and processes that can be used to turn these examples [of successful approaches to sustainability] into widely applied success stories. Collaboration and inter-connections are required to successfully implement and to disseminate approaches and methods in many new contexts.		x	future research should focus on methods to turn positive examples into success stories			x	x		-	x
2015	Blok, Long, Gaziulusoy, Ciliz, Lozano, Huisingh, Csutora, Boks	EU	From best practices to bridges for a more sustainable future: Advances and challenges in the transition to global sustainable production and consumption	Journal Publication	Journal of Cleaner Production	Identify barriers / requirements / success factors for successful ecodesign implementation	The forms, mechanisms, drivers and attitudes that will support effective and widespread implementation are key areas which require further study and investigation […]		x	future research should focus on drivers and success factors of ecodesign implementation			x			-	x
2015	Blok, Long, Gaziulusoy, Ciliz, Lozano, Huisingh, Csutora, Boks	EU	From best practices to bridges for a more sustainable future: Advances and challenges in the transition to global sustainable production and consumption	Journal Publication	Journal of Cleaner Production	Identify barriers / requirements / success factors for successful ecodesign implementation	One objective, only partially addressed [...], concerned the identification of mechanisms that allowed successful examples of advances towards sustainable production and consumption to be shared, spread and scaled-up. This is necessary at multiple scales, including where distance, in terms of geography or cultural norms, make such transfers more difficult. [...] [This includes] the identification…		x	future research should focus on knowledge sharing, spreading and upscaling			x			-	x
2015	Blok, Long, Gaziulusoy, Ciliz, Lozano, Huisingh, Csutora, Boks	EU	From best practices to bridges for a more sustainable future: Advances and challenges in the transition to global sustainable production and consumption	Journal Publication	Journal of Cleaner Production	Identify barriers / requirements / success factors for successful ecodesign implementation	[...] action only on the production or consumption sides produces limited results, due to phenomena such as rebound effects [...] A key question then is, how can consumption behaviours, practices and patterns, and the link to production, distribution and retail, be incorporated into product, service and system designs? New ways of working, collaborating and sharing must be identified, tested, ada…		x	future research should focus on collaboration with all stakeholders and systemic solutions that take the rebound effect into account			x			-	x
2015	Blok, Long, Gaziulusoy, Ciliz, Lozano, Huisingh, Csutora, Boks	EU	From best practices to bridges for a more sustainable future: Advances and challenges in the transition to global sustainable production and consumption	Journal Publication	Journal of Cleaner Production	Identify barriers / requirements / success factors for successful ecodesign implementation	[...] approaches such as responsible research and innovation, which are designed to catalyse the incorporation of key concepts and objectives of sustainability into the research and innovation process, should be at the forefront of present and future transition efforts. The same applies to the concept of ‘user-centred design.’ When the greater understanding of behaviour and it's relationships wit…		x	future research should focus on responsible research and innovation, user centered design and multidisciplinary research cooperation			x	x	x	-	x
2015	Blok, Long, Gaziulusoy, Ciliz, Lozano, Huisingh, Csutora, Boks	EU	From best practices to bridges for a more sustainable future: Advances and challenges in the transition to global sustainable production and consumption	Journal Publication	Journal of Cleaner Production	Identify barriers / requirements / success factors for successful ecodesign implementation	Future research should [maintain] a commitment to multidisciplinary methods and the combining of technological and social science perspectives.		x	future research should focus on multidisciplinary methods and combing a technical and social perspective			x	x	x	-	x
2015	Brones, de Carvalho	LA	From 50 to 1: Integrating literature toward a systemic ecodesign model	Journal Publication	Journal of Cleaner Production	Introduce a new framework	It is observed that [the ecodesign integration models] rarely refer directly to the most accepted models of innovation management in companies, such as stage-gate, although this is quite recommended by some experts in the topics.	x		ecodesign implementation could benefit from established models of innovation management			x		x	Ecodesign	x
2015	Brones, de Carvalho	LA	From 50 to 1: Integrating literature toward a systemic ecodesign model	Journal Publication	Journal of Cleaner Production	Introduce a new framework	[The main] challenges of undertaking a literature review on this topic [are] the lack of vocabulary alignment [and] dispersed literature […]	x		the lack of vocabulary alignment and the dispersed literature complicate ecodesign literature reviews	x		x			Ecodesign	x
2015	Dangelico	EU	Green Product Innovation: Where we are and Where we are Going	Journal Publication	Business Strategy and the Environment	Identify barriers / requirements / success factors for successful ecodesign implementation	Among internal [antecedents of green product innovation], the most important are the prospect of competitive advantage, cost reduction and market benefits and the expectation of improvement of reputation and of opportunities for innovation as well.	x		economic benefits are the most important internal driver for ecodesign implementation			x			Green Product Innovation	x
2015	Dangelico	EU	Green Product Innovation: Where we are and Where we are Going	Journal Publication	Business Strategy and the Environment	Identify barriers / requirements / success factors for successful ecodesign implementation	Among external [antecedents of green product innovation], the most important are environmental regulations – current and/or expected – followed by market demand and market stakeholder pressure. A little less relevant seems to be technology. Networking activities also proved to positively influence GPI [green product innovation] development. [...] environmental regulations represent the most impor…	x		environmental regulation is the most important external driver for ecodesign implementation			x			Green Product Innovation	x
2015	Dangelico	EU	Green Product Innovation: Where we are and Where we are Going	Journal Publication	Business Strategy and the Environment	Identify barriers / requirements / success factors for successful ecodesign implementation	Among managerial factors [that can influence the successful development of green product innovation], top management commitment is key, as well as considering environmental aspects from the start, having environmental champions and formalizing environmental policies and targets for products.	x		top management commitment, environmental champions and formalizing policies and targets for products are key factors of successful ecodesign implementation			x			Green Product Innovation	x
2015	Dangelico	EU	Green Product Innovation: Where we are and Where we are Going	Journal Publication	Business Strategy and the Environment	Identify barriers / requirements / success factors for successful ecodesign implementation	Further, this study demonstrates that creating and fostering networks of collaborations as well as enhancing knowledge exchange, both within and outside the firm, is beneficial for GPI [green product innovation] development.	x		ecodesign involves cooperation in learning-oriented networks of companies, universities and government			x			Green Product Innovation	x
2015	Dangelico	EU	Green Product Innovation: Where we are and Where we are Going	Journal Publication	Business Strategy and the Environment	Identify barriers / requirements / success factors for successful ecodesign implementation	In terms of the development process, cross-functional teams, integration and coordination as well as implementing eco-design and life cycle assessment are the most important success factors.	x		cross-functional teams, coordination and sustainability assessment are key factors of successful ecodesign implementation			x	x		Green Product Innovation	x
2015	Dangelico	EU	Green Product Innovation: Where we are and Where we are Going	Journal Publication	Business Strategy and the Environment	Identify barriers / requirements / success factors for successful ecodesign implementation	Resource and capabilities also proved to be key factors of a successful GPI [green product innovation] development.	x		resources and capabilities are key factors of successful ecodesign implementation			x			Green Product Innovation	x
2015	Dangelico	EU	Green Product Innovation: Where we are and Where we are Going	Journal Publication	Business Strategy and the Environment	Identify barriers / requirements / success factors for successful ecodesign implementation	[...] there are contrasting results related to the influence of foreign ownership, firm size, EMS [environmental management systems], community and regulatory stakeholders. It would be interesting to deepen our knowledge of the conditions under which there are significant and positive influences of these factors. Further, it would be useful to simultaneously consider different antecedents to unde…		x	future research should focus on antecedents and success factors of ecodesign implementation			x			Green Product Innovation	x
2015	Dangelico	EU	Green Product Innovation: Where we are and Where we are Going	Journal Publication	Business Strategy and the Environment	Identify barriers / requirements / success factors for successful ecodesign implementation	With regard to GPI [green product innovation] outcomes, contrasting results relate to financial and market performance. It would be interesting to deepen our knowledge of these issues and understand under what conditions GPI development leads to high financial and market performance and whether the results vary across industries.		x	future research should focus on conditions for economic success of ecodesign implementation			x			Green Product Innovation	x
2015	Dangelico	EU	Green Product Innovation: Where we are and Where we are Going	Journal Publication	Business Strategy and the Environment	Identify barriers / requirements / success factors for successful ecodesign implementation	Referring to success factors for GPI [green product innovation], future research should be more explicit in distinguishing between environmental performance and market/financial performance of GPI or between incremental GPI and radical GPI.		x	future research should focus on distinguishing between incremental and radical ecodesign and environmental and economic performance			x			Green Product Innovation	x
2015	Dangelico	EU	Green Product Innovation: Where we are and Where we are Going	Journal Publication	Business Strategy and the Environment	Identify barriers / requirements / success factors for successful ecodesign implementation	Future studies should also be devoted to broadening research on GPI [green product innovation] to other countries, especially developing ones, where limited research on GPI has been conducted so far. This could be useful to understand whether antecedents, outcomes and success factors are different from those found for developed countries. Further, multicountry and multi-continent studies should b…		x	future research should focus on broadening the regional scope of ecodesign research to include developing countries			x			Green Product Innovation	x
2015	Dangelico	EU	Green Product Innovation: Where we are and Where we are Going	Journal Publication	Business Strategy and the Environment	Identify barriers / requirements / success factors for successful ecodesign implementation	Even though GPI [green product innovation] development and conventional new product development have many success factors in common, this study shows that some distinctive capabilities are required for successful GPI development. With regard to capabilities in common with conventional new product development, it would be interesting for future research to investigate whether there is a difference…		x	future research should focus on the distinctive capabilities required for ecodesign compared to conventional product development			x			Green Product Innovation	x
2015	Dangelico	EU	Green Product Innovation: Where we are and Where we are Going	Journal Publication	Business Strategy and the Environment	Identify barriers / requirements / success factors for successful ecodesign implementation	Referring to adopted theories, few of the reviewed studies explicitly rely on established organizational and managerial theories. Further, in the analysed studies, some theories have not been used, but could be of great relevance.	x		ecodesign implementation could benefit from established organizational and managerial theories			x		x	Green Product Innovation	x
2015	Doualle, Medini, Boucher, Laforest	EU	Investigating Sustainability Assessment Methods of Product-service Systems	Conference Proceeding	Proceedings from the 7th Industrial Product-Service Systems Conference	Review methods and tools	PSS [product service systems] may lead to increase environmental impact or decrease social interactions under certain circumstances.	x		product service systems (PSS) are not necessarily more sustainable than products and may decrease social interactions			x			Product Service Systems	x
2015	Doualle, Medini, Boucher, Laforest	EU	Investigating Sustainability Assessment Methods of Product-service Systems	Conference Proceeding	Proceedings from the 7th Industrial Product-Service Systems Conference	Review methods and tools	[…] the design of PSS [product service systems] is a critical step which requires methods and tools to guide stakeholders of the PSS throughout a life cycle perspective.	x		the design of product service systems (PSS) requires methods and tools			x	x		Product Service Systems	x
2015	Doualle, Medini, Boucher, Laforest	EU	Investigating Sustainability Assessment Methods of Product-service Systems	Conference Proceeding	Proceedings from the 7th Industrial Product-Service Systems Conference	Review methods and tools	[...] there is still a gap between the design and evaluation phases of the PSS [product service systems] development process. Such gap could be filled out by developing multi-level methods to enable practitioners to assess the impact (in terms of sustainability) of their choices at different stages of the design process.		x	future research should focus on bridging the gap between design and assessment of product service systems (PSS)			x	x		Product Service Systems	x
2015	Doualle, Medini, Boucher, Laforest	EU	Investigating Sustainability Assessment Methods of Product-service Systems	Conference Proceeding	Proceedings from the 7th Industrial Product-Service Systems Conference	Review methods and tools	A first support can be provided at the very beginning of the design process and which involves the functional analysis. [...] Another support can be provided at later stages and is concerned with the configuration of the value chain delivering the PSS [product service systems] to the market.		x	future research should focus on functional analysis and value chain configurations of product service system (PSS) implementation			x		x	Product Service Systems	x
2015	Gaziulusoy	Asia	A critical review of approaches available for design and innovation teams through the perspective of sustainability science and system innovation theories	Journal Publication	Journal of Cleaner Production	Compare different concepts / definitions / terminology	Sustainability is a system property; therefore, products/services/technologies/organisations cannot be sustainable on their own but they may be elements of sustainable systems. In addition, to achieve sustainability, there is a requirement for transformation of socio-technical systems which fulfil certain social functions such as energy, mobility and food. The theoretical and practical approaches…	x		sustainability is a system property, therefore ecodesign needs to aim for system level changes	x		x			-	x
2015	Gaziulusoy	Asia	A critical review of approaches available for design and innovation teams through the perspective of sustainability science and system innovation theories	Journal Publication	Journal of Cleaner Production	Compare different concepts / definitions / terminology	[…] legislative measures are developed based on best available practices in the industry around specific issues within specific sectors and only cover short-term. […] It is acknowledged [...] that legislation and regulatory measures play a significant role in driving design and innovation for sustainability, however, design and innovation strategies developed with the sole aim of addressing the l…	x		legislation is an important driver of ecodesign, yet it currently does not go far enough			x			-	x
2015	Gaziulusoy	Asia	A critical review of approaches available for design and innovation teams through the perspective of sustainability science and system innovation theories	Journal Publication	Journal of Cleaner Production	Compare different concepts / definitions / terminology	Voluntary initiatives [...] are generally driven by economic incentives and the benefits of these economic incentives may be direct and prompt. Nevertheless, despite the potential of voluntary initiatives to bring significant economic and environmental improvements in the short term, these do not necessarily directly inform design and innovation process and, more importantly, they create a risk o…	x		voluntary initiatives might obstruct radical innovation			x			-	x
2015	Gaziulusoy	Asia	A critical review of approaches available for design and innovation teams through the perspective of sustainability science and system innovation theories	Journal Publication	Journal of Cleaner Production	Compare different concepts / definitions / terminology	[…] none of the design and innovation frameworks analysed met all of the specified criteria [strong sustainability, systems thinking, radical innovation, long-term planning, change in mindset] but all of them met some criteria to varying degrees.	x		none of the existing ecodesign frameworks address all necessary prerequisites of sustainable system innovation			x			-	x
2015	Gaziulusoy	Asia	A critical review of approaches available for design and innovation teams through the perspective of sustainability science and system innovation theories	Journal Publication	Journal of Cleaner Production	Compare different concepts / definitions / terminology	[...] three items are identified to establish a future research agenda: I. Exploration of synergies between existing frameworks to aid design and innovation strategy in the context of systemic transformations for sustainability; II. Development of a theoretical framework for design and innovation for sustainability with references to system innovation and transition management theories; III. Deve…		x	future research should focus on synergies between existing ecodesign frameworks and on operationalizing system innovation and transition management			x			-	x
2015	Gaziulusoy, Brezet	Asia	Design for system innovations and transitions: A conceptual framework integrating insights from sustainablity science and theories of system innovations and transitions	Journal Publication	Journal of Cleaner Production	Introduce a new framework	There is a need for development of theoretical insights and practical approaches to align design for sustainability practices taking place at micro- and meso-levels of socio-technical systems, i.e. design and innovation teams and companies, with the systemic changes that are unfolding within the wider society.		x	future research should focus on aligning ecodesign practices at micro-/ meso level with societal systemic changes			x			Design for System Innovation	x
2015	Gaziulusoy, Brezet	Asia	Design for system innovations and transitions: A conceptual framework integrating insights from sustainablity science and theories of system innovations and transitions	Journal Publication	Journal of Cleaner Production	Introduce a new framework	The key messages [...] for companies and design and innovation teams include adopting a systemic and long-term perspective and interpreting insights emerging from this perspective strategically with references to shorter time frames they have to operate.		x	companies need to adopt a systemic, long-term perspective			x			Design for System Innovation	x
2015	Gaziulusoy, Brezet	Asia	Design for system innovations and transitions: A conceptual framework integrating insights from sustainablity science and theories of system innovations and transitions	Journal Publication	Journal of Cleaner Production	Introduce a new framework	This [new role for companies] involves strategic envisioning, tactical networking, operational innovation and reflexive monitoring and evaluation.		x	companies need to implement environmental strategies and engage in networking, innovation, monitoring and evaluation			x			Design for System Innovation	x
2015	Gaziulusoy, Brezet	Asia	Design for system innovations and transitions: A conceptual framework integrating insights from sustainablity science and theories of system innovations and transitions	Journal Publication	Journal of Cleaner Production	Introduce a new framework	[...] the unexamined assumptions of mainstream and still dominant literature on business and innovation focus on incremental interventions which can be achieved within single companies and in short time frames. [...] This is in alignment with the short-comings of a neo-liberal economic system that offers only marginal incentives for companies to adopt innovation perspectives beyond current market…	x		the current economic system incentivizes only incremental improvements of the sustainability of products and services			x			Design for System Innovation	x
2015	Gaziulusoy, Brezet	Asia	Design for system innovations and transitions: A conceptual framework integrating insights from sustainablity science and theories of system innovations and transitions	Journal Publication	Journal of Cleaner Production	Introduce a new framework	[…] currently there is an emerging observable shift in collective business mind-set towards adopting systemic and long-term perspectives.	x		the ecodesign mindset is shifting towards a systemic, long-term perspective		x				Design for System Innovation	x
2015	Gaziulusoy, Brezet	Asia	Design for system innovations and transitions: A conceptual framework integrating insights from sustainablity science and theories of system innovations and transitions	Journal Publication	Journal of Cleaner Production	Introduce a new framework	[...] the process of sustainable innovation involves establishing interorganisational networks including other companies but also wider stakeholders. Evidences of such learning-oriented networking can be found in the globally increasing number of consortiums bringing together universities, industry and government on projects focussing on system innovations and transitions [...]	x		ecodesign involves cooperation in learning-oriented networks of companies, universities and government			x			Design for System Innovation	x
2015	Gaziulusoy, Brezet	Asia	Design for system innovations and transitions: A conceptual framework integrating insights from sustainablity science and theories of system innovations and transitions	Journal Publication	Journal of Cleaner Production	Introduce a new framework	[…] several sustainability transitions have moved from predevelopment to taking-off and several from taking-off to acceleration phase.	x		sustainability transitions are progressing		x				Design for System Innovation	x
2015	Go, Wahab, Hishamuddin	Asia	Multiple generation life-cycles for product sustainability: The way forward	Journal Publication	Journal of Cleaner Production	Combine two previously unrelated fields or concepts	MLC [multiple life cycles] of a product can be implemented via multiple reuses, remanufacturing, or a combination of recycling, reuse and remanufacturing for different life-cycle generations. In other words, designing a product for sustainability that goes beyond one life-cycle requires consideration for factors per- taining to the product's EOL [end of life] such as disassembly, recycling, reuse…		x	products for multiple life cycle should not be designed for a single recovery solution (e.g. remanufacturing)			x			-	x
2015	Go, Wahab, Hishamuddin	Asia	Multiple generation life-cycles for product sustainability: The way forward	Journal Publication	Journal of Cleaner Production	Combine two previously unrelated fields or concepts	If multiple products' life-cycles can be successfully created, it will promote an economically competitive EOL [end of life] treatment and will reduce the negative environmental impacts of discarded products.		x	products with multiple life cycles will have a reduced environmental impact			x			-	x
2015	Go, Wahab, Hishamuddin	Asia	Multiple generation life-cycles for product sustainability: The way forward	Journal Publication	Journal of Cleaner Production	Combine two previously unrelated fields or concepts	[research gap:] develop a support tool that can help designers reduce the environmental impact of products through multiple life-cycle design.		x	future research should focus on tools for multiple life cycle design			x	x		-	x
2015	Paulson, Sundin	EU	Challenges and trends within eco-design	Conference Proceeding	Proceedings of EcoDesign 2015 International Symposium	Identify barriers / requirements / success factors for successful ecodesign implementation	The study reveals challenges and trends within eco-design and structure them into four categories; 1) System and success level; 2) Strategy level; 3) Action level; and 4) Tools level. Most challenges and least trends are found within the category Systems and success level. The other categories holds roughly the same amount of challenges and trends. [...] more research and other activities shall b…		x	future research should focus on the system level of ecodesign			x			Ecodesign	x
2015	Paulson, Sundin	EU	Challenges and trends within eco-design	Conference Proceeding	Proceedings of EcoDesign 2015 International Symposium	Identify barriers / requirements / success factors for successful ecodesign implementation	[research gap:] How can the environmental (or sustainability) knowledge, information and information flows that is needed for a company to proceed its ambition to develop more environmentally (or sustainable) products be mapped in an efficient way?		x	future research should focus on mapping information flows for ecodesign implementation			x			Ecodesign	x
2015	Paulson, Sundin	EU	Challenges and trends within eco-design	Conference Proceeding	Proceedings of EcoDesign 2015 International Symposium	Identify barriers / requirements / success factors for successful ecodesign implementation	[research gap:] How can industry in a most efficient way make trade-offs between different aspects, especially aspects where all dimensions of sustainability can be included, together with a life cycle perspective?		x	future research should focus on handling trade-offs between all three dimensions of sustainability			x			Ecodesign	x
2015	Paulson, Sundin	EU	Challenges and trends within eco-design	Conference Proceeding	Proceedings of EcoDesign 2015 International Symposium	Identify barriers / requirements / success factors for successful ecodesign implementation	[research gap:] How can industry in a most efficient way find environmentally (or sustainability) oriented needs, prioritize them and set profitable requirements on them?		x	future research should focus on identifying, prioritizing and operationalizing environmentally oriented needs			x			Ecodesign	x
2015	Paulson, Sundin	EU	Challenges and trends within eco-design	Conference Proceeding	Proceedings of EcoDesign 2015 International Symposium	Identify barriers / requirements / success factors for successful ecodesign implementation	[research gap:] How can a low economic risk road map for implementing eco-design practices in a company be developed? The roadmap shall induce profit (attractive enough) both in a short and long term. (Barriers which are important and how to avoid or handle them shall also be described, and which drivers that must be in place to succeed)		x	future research should focus on economic risks of implementing ecodesign in companies			x			Ecodesign	x
2015	Paulson, Sundin	EU	Challenges and trends within eco-design	Conference Proceeding	Proceedings of EcoDesign 2015 International Symposium	Identify barriers / requirements / success factors for successful ecodesign implementation	[research gap:] How to develop and communicate more knowledge than exist today about how different companies do eco-design and their needs?		x	future research should focus on information sharing among companies regarding their ecodesign practices			x			Ecodesign	x
2015	Pigosso, McAloone, Rozenfeld	EU	Characterization of the State-of-the-art and Identification of Main Trends for Ecodesign Tools and Methods: Classifying Three Decades of Research and Implementation	Journal Publication	Journal of the Indian Institute of Science	Review methods and tools	[There is a] growing interest in the development and application of ecodesign methods and tools. It is expected that the number of papers will continuously increase in the coming years[.]	x		interest in the development and implementation of ecodesign methods and tools is growing		x		x		Ecodesign	x
2015	Pigosso, McAloone, Rozenfeld	EU	Characterization of the State-of-the-art and Identification of Main Trends for Ecodesign Tools and Methods: Classifying Three Decades of Research and Implementation	Journal Publication	Journal of the Indian Institute of Science	Review methods and tools	Increased number of authors in the recent years indicates an expansion of the knowledge area, while the relatively low number of articles per author indicate that ecodesign might not be their primary research topic[.]	x		the knowledge area of ecodesign is expanding		x				Ecodesign	x
2015	Pigosso, McAloone, Rozenfeld	EU	Characterization of the State-of-the-art and Identification of Main Trends for Ecodesign Tools and Methods: Classifying Three Decades of Research and Implementation	Journal Publication	Journal of the Indian Institute of Science	Review methods and tools	Europe, Asia and South America hosts the institutions with the highest publication track on ecodesign methods and tools, while USA as a country holds the highest number of published journal articles[.]	x		most ecodesign publications originate from Europe, Asia and South America (as regions) and the USA (as a country)		x				Ecodesign	x
2015	Pigosso, McAloone, Rozenfeld	EU	Characterization of the State-of-the-art and Identification of Main Trends for Ecodesign Tools and Methods: Classifying Three Decades of Research and Implementation	Journal Publication	Journal of the Indian Institute of Science	Review methods and tools	One hundred different journals were recorded, indicating high multidisciplinary level of the knowledge area […]	x		the topic of ecodesign is highly multidisciplinary		x				Ecodesign	x
2015	Pigosso, McAloone, Rozenfeld	EU	Characterization of the State-of-the-art and Identification of Main Trends for Ecodesign Tools and Methods: Classifying Three Decades of Research and Implementation	Journal Publication	Journal of the Indian Institute of Science	Review methods and tools	[future research] Focus on sustainable design, by means of the integration of social, environmental and economic issues in product development.		x	future research should focus on implementing all three dimensions of sustainability into product development			x			Ecodesign	x
2015	Pigosso, McAloone, Rozenfeld	EU	Characterization of the State-of-the-art and Identification of Main Trends for Ecodesign Tools and Methods: Classifying Three Decades of Research and Implementation	Journal Publication	Journal of the Indian Institute of Science	Review methods and tools	[future research] Development of comprehensive tools to evaluate the economic, environmental and social performance of products.		x	future research should focus on the assessment of all three dimensions of sustainability			x			Ecodesign	x
2015	Pigosso, McAloone, Rozenfeld	EU	Characterization of the State-of-the-art and Identification of Main Trends for Ecodesign Tools and Methods: Classifying Three Decades of Research and Implementation	Journal Publication	Journal of the Indian Institute of Science	Review methods and tools	[future research] Increased focus on systems thinking for the understanding of relations and interactions between elements.		x	future research should focus on systems thinking			x			Ecodesign	x
2015	Pigosso, McAloone, Rozenfeld	EU	Characterization of the State-of-the-art and Identification of Main Trends for Ecodesign Tools and Methods: Classifying Three Decades of Research and Implementation	Journal Publication	Journal of the Indian Institute of Science	Review methods and tools	[future research] Increased focus on circular economy as an overall strategy for EOL [end of life] strategies and a sustainable economy.		x	future research should focus on the concept of a circular economy for end of life (EOL) strategies			x			Ecodesign	x
2015	Pigosso, McAloone, Rozenfeld	EU	Characterization of the State-of-the-art and Identification of Main Trends for Ecodesign Tools and Methods: Classifying Three Decades of Research and Implementation	Journal Publication	Journal of the Indian Institute of Science	Review methods and tools	[future research] Enhanced link between product development and other business processes of organizations (such as marketing, purchasing, financing, services, etc.).		x	future research should focus on enhancing links between product development and other business processes			x			Ecodesign	x
2015	Pigosso, McAloone, Rozenfeld	EU	Characterization of the State-of-the-art and Identification of Main Trends for Ecodesign Tools and Methods: Classifying Three Decades of Research and Implementation	Journal Publication	Journal of the Indian Institute of Science	Review methods and tools	[future research] Incorporation of the planetary boundaries in the evaluation of the environmental and social performance of products and technologies.		x	future research should focus on incorporating planetary boundaries in sustainability assessment			x			Ecodesign	x
2015	Pigosso, McAloone, Rozenfeld	EU	Characterization of the State-of-the-art and Identification of Main Trends for Ecodesign Tools and Methods: Classifying Three Decades of Research and Implementation	Journal Publication	Journal of the Indian Institute of Science	Review methods and tools	[future research] Stronger focus on the managerial and strategic issues towards ecodesign implementation.		x	future research should focus on managerial and strategic support for ecodesign implementation			x			Ecodesign	x
2015	Pigosso, McAloone, Rozenfeld	EU	Characterization of the State-of-the-art and Identification of Main Trends for Ecodesign Tools and Methods: Classifying Three Decades of Research and Implementation	Journal Publication	Journal of the Indian Institute of Science	Review methods and tools	[future research] Increased industry uptake by the consolidation of existing tools, approaches and methods for a streamlined application by industry.		x	future research should focus on streamlining ecodesign methods on tool to increase implementation by companies			x	x		Ecodesign	x
2015	Tukker	EU	Product services for a resource-efficient and circular economy - A review	Journal Publication	Journal of Cleaner Production	Provide a general / historical overview of the field	[…] research in the field of PSS is progressing well. The number of papers published annually has more than quadrupled in the last decade, whereas the number of scientific publications in general has only doubled. Where research labeled as PSS started out in Europe, it is now clearly embedded in the research infrastructure in a number of Asian countries. PSS is a subject that is nowalso discussed…	x		product service systems (PSS) as a research domain is spreading and progressing well		x				Product Service Systems	x
2015	Tukker	EU	Product services for a resource-efficient and circular economy - A review	Journal Publication	Journal of Cleaner Production	Provide a general / historical overview of the field	[…] this definition [‘A Product-Service System (PSS) is an integrated bundle of products and services which aims at creating customer utility and generating value’] scarcely differs from those developed before 2006, which suggests that at a general level the conceptualization of PSS had already become quite mature by then. [...] [With PSS design methodologies] too we see that the literature after…	x		the definition of product service systems (PSS) has matured	x	x				Product Service Systems	x
2015	Tukker	EU	Product services for a resource-efficient and circular economy - A review	Journal Publication	Journal of Cleaner Production	Provide a general / historical overview of the field	[There is] a clear need to define a common ontology for aspects such as characteristics of requirements, product services, stakeholders, (steps in the) design processes, life-cycle stages, outcomes, business models and support systems. This is probably not so much a question of doing more research but rather embarking on a standardization process in the PSS [product service systems] community.		x	future research on product service systems (PSS) should focus on standardization			x			Product Service Systems	x
2015	Tukker	EU	Product services for a resource-efficient and circular economy - A review	Journal Publication	Journal of Cleaner Production	Provide a general / historical overview of the field	Important new suggestions [for PSS design methodologies] include proposals to accelerate PSS [product service systems] development and make them more versatile by using a modular design approach [...], as well as a host of suggestions for specific tools that could be used (such as applying requirement engineering, various economic optimization techniques, technology roadmapping to understand PSS …		x	future research on product service system (PSS) design should focus on versatility and applying existing tools			x	x		Product Service Systems	x
2015	Tukker	EU	Product services for a resource-efficient and circular economy - A review	Journal Publication	Journal of Cleaner Production	Provide a general / historical overview of the field	Some authors claim, however, that integration of such tools [for PSS design] in the main detailed PSS [product service systems] design methods that are available is not yet mature or that tools are still lacking, potentially leading to a lack of emphasis on requirements that should drive PSS design, how to organize co-creation processes, sustainability opportunities, and the relevance of differen…		x	future research should focus on requirements for product service system (PSS) design, organization of co-creation processes and the differences between types of PSS in the design process			x			Product Service Systems	x
2015	Tukker	EU	Product services for a resource-efficient and circular economy - A review	Journal Publication	Journal of Cleaner Production	Provide a general / historical overview of the field	The most important contribution of the post-2006 literature is probably the strong attention to what PSS development means for a company’s structure, culture, capabilities and management. Examples are a focus on product availability for clients rather than product production; an emphasis on diversification through services rather than product ranges; and the need for staff to possess both product…	x		key success factors for product service system (PSS) implementation are a focus on product availabilty, diversification through services and staff knowledge and skills			x			Product Service Systems	x
2015	Tukker	EU	Product services for a resource-efficient and circular economy - A review	Journal Publication	Journal of Cleaner Production	Provide a general / historical overview of the field	PSS [product service systems] is not the sustainability panacea. Renting, leasing and sharing can have environmental benefits since, in principle, the same service level can be achieved with the use of fewer artifacts. However, leased products tend to be used less carefully than products that are owned, and rented, leased or shared products may be returned earlier to the service provider in compa…	x		product service systems (PSS) are not necessarily more sustainable than products			x			Product Service Systems	x
2015	Tukker	EU	Product services for a resource-efficient and circular economy - A review	Journal Publication	Journal of Cleaner Production	Provide a general / historical overview of the field	For some firms, the costs of the transition from product-oriented to PSS-oriented can be prohibitive, particularly for result-oriented PSS [product service systems] requiring a totally different skill set and organization than in the case of product sales. Due to the high labor intensity, PSS can be more expensive than having a product operated by a consumer. High speeds of innovation make re-use…	x		there are significant obstacles for companies implementing product service systems (PSS), mostly economic ones			x			Product Service Systems	x
2015	Tukker	EU	Product services for a resource-efficient and circular economy - A review	Journal Publication	Journal of Cleaner Production	Provide a general / historical overview of the field	It is striking, however, that quantitative research methods like surveys, statistical data analyses, and even meta-reviews analyzing quantitative data from case studies are still rarely applied. Such research is recommended for the future, since it is essential to have a quantified and detailed understanding of the economic and other benefits of different PSS [product service systems] in differen…		x	more thorough research is required to quantify benefits of product service system (PSS) implementation			x			Product Service Systems	x
2015	Tukker	EU	Product services for a resource-efficient and circular economy - A review	Journal Publication	Journal of Cleaner Production	Provide a general / historical overview of the field	The first question is to what extent sustainable PSS [product service systems] can contribute to resource-efficiency and a circular economy. Product-oriented PSS do not change the incentive to maximize product sales. Use-oriented PSS potentially intensify the use of material products and hence could reduce the need for materials, but a possible drawback is that they could prompt less careful use,…		x	results oriented product service systems (PSS) have the greatest potential to reduce environmental impact, but require the most radical change in business models			x			Product Service Systems	x
2015	Tukker	EU	Product services for a resource-efficient and circular economy - A review	Journal Publication	Journal of Cleaner Production	Provide a general / historical overview of the field	"Why have sustainable Product-Service Systems [PSS] not been widely implemented?” […] Particularly in B2C [business to customer] markets, time and again it has been found that one of the most valued issues for consumers is to have control over things, artifacts, and life itself [...]	x		customers valuing product ownership obstruct product service system (PSS) implementation			x			Product Service Systems	x
2015	Tukker	EU	Product services for a resource-efficient and circular economy - A review	Journal Publication	Journal of Cleaner Production	Provide a general / historical overview of the field	Supportive policies may be able to help diffusion of PSS [product service systems] […], but this is unlikely to be a productive way forward if customer experience of PSS is truly much lower than for the competing product.	x		policy can not replace customer focus in product service system (PSS) diffusion			x			Product Service Systems	x
2015	Tukker	EU	Product services for a resource-efficient and circular economy - A review	Journal Publication	Journal of Cleaner Production	Provide a general / historical overview of the field	[…] stimulating wider diffusion of PSS [product service systems] would be supported by designs that enhance rather than limit customer experience and, from the firm’s perspective, by improved insights into how the risks from a transition from a product-centered firm to a PSS-centered firm can best be managed.		x	future research should focus on customer centered product service systems (PSS) and risk management in companies' transitions towards PSS			x			Product Service Systems	x
2016	Bocken, de Pauw, Bakker, van der Grinten	EU	Product design and business model strategies for a circular economy	Journal Publication	Journal of Industrial and Production Engineering	Combine two previously unrelated fields or concepts	In order to transform the economy from linear to circular, business model and design strategies will need to go hand in hand. Potentially, we will need multiple business model and design strategies, approaches, methods, and tools to support the move to a circular economy.		x	ecodesigned products need to be accompanied by complementary business models, and vice versa			x		x	Product Design for a Circular Economy	x
2016	Bocken, de Pauw, Bakker, van der Grinten	EU	Product design and business model strategies for a circular economy	Journal Publication	Journal of Industrial and Production Engineering	Combine two previously unrelated fields or concepts	[…] “systems thinking” remains important, to remain vigilant of rebound effects [...] and the wider consequences of adopting each of the strategies, not only from the environmental and economic perspective, but also from the social perspective.		x	systems thinking remains important to consider rebound effects and all three dimensions of sustainability			x			Product Design for a Circular Economy	x
2016	Bocken, de Pauw, Bakker, van der Grinten	EU	Product design and business model strategies for a circular economy	Journal Publication	Journal of Industrial and Production Engineering	Combine two previously unrelated fields or concepts	Future work will need to include other essential elements such as the supply chain, enabling technologies, and infrastructure. This includes the development of case studies to test the identified strategies. Furthermore, researchers might want to “dissect” each of the strategies into further sub strategies or develop hybrid or entirely new forms that contribute to a circular economy.		x	future research should focus on additional elements, case studies and dissection of strategies for sustainable business models			x		x	Product Design for a Circular Economy	x
2016	Bocken, de Pauw, Bakker, van der Grinten	EU	Product design and business model strategies for a circular economy	Journal Publication	Journal of Industrial and Production Engineering	Combine two previously unrelated fields or concepts	[…] methods for assessing the environmental, social, and economic sustainability of circular products and business models will need to be developed.		x	assessment methods for ecodesigned products need to cover all three dimensions of sustainability			x	x		Product Design for a Circular Economy	x
2016	Ceschin, Gaziulusoy	EU	Evolution of design for sustainability: From product design to design for system innovations and transitions	Journal Publication	Design Studies	Compare different concepts / definitions / terminology	[…] the DfS [design for environment] field has progressively expanded from a technical and product-centric focus towards a focus on large scale system level changes, in which sustainability is understood as a socio-technical challenge.	x		ecodesign has evolved into a more systemic approach, now stretching beyond pure technical considerations	x	x				Design for Sustainability	x
2016	Ma, Kremer	NAR	A systematic literature review of modular product design (MPD) from the perspective of sustainability	Journal Publication	International Journal of Advanced Manufacturing Technology	Combine two previously unrelated fields or concepts	MPD [modular product design] has a positive impact on sustainability. It can improve sustainability performance not only from a technological or monetary view, as determined using optimized cluster algorithms and methodologies, but also from the creative or social perspectives, such as MPD for product innovation or MPD for human rights.	x		modular product design has potential benefits for all three dimensions of sustainability					x	Modular Product Design	x
2016	Ma, Kremer	NAR	A systematic literature review of modular product design (MPD) from the perspective of sustainability	Journal Publication	International Journal of Advanced Manufacturing Technology	Combine two previously unrelated fields or concepts	Initially, MPD [modular product development] has been applied in design engineering primarily with the economic optimization considerations. [...] With the involvement of sustainability, MPD extends applications to service operations (e.g., green supply chain), environmental protection (e.g., emission reduction), human rights assurance (e.g., labor hour per day constraint), or even government reg…	x		the potential benefits of modular product design extend beyond economic considerations					x	Modular Product Design	x
2016	Rivera, Lallmahomed	EU	Environmental implications of planned obsolescence and product lifetime: a literature review	Journal Publication	International Journal of Sustainable Engineering	Combine two previously unrelated fields or concepts	[…] the environmental impact directly associated with a product lifetime is given limited consideration in the product development process.	x		the environmental impact of product lifetime is currently given limited consideration in the product development process (PDP)			x			-	x
2016	Rivera, Lallmahomed	EU	Environmental implications of planned obsolescence and product lifetime: a literature review	Journal Publication	International Journal of Sustainable Engineering	Combine two previously unrelated fields or concepts	Minimizing products lifetime impacts is not the sole responsibility of the designer, but producers, consumers, government and business and service providers.	x		reducing the environmental impact of a product is a shared responsibility between designers, producers, consumers, governments, business and service provider			x			-	x
2016	Rivera, Lallmahomed	EU	Environmental implications of planned obsolescence and product lifetime: a literature review	Journal Publication	International Journal of Sustainable Engineering	Combine two previously unrelated fields or concepts	[...] the complexity of the product development process, understanding of industrial drivers and will, the innovations cycle, marketing, system dynamics and knowledge availability among others should all be taken into consideration for a holistic analysis of product systems.		x	ecodesign implementation should be accompanied by a holisitic analysis of the product system			x			-	x
2016	Rivera, Lallmahomed	EU	Environmental implications of planned obsolescence and product lifetime: a literature review	Journal Publication	International Journal of Sustainable Engineering	Combine two previously unrelated fields or concepts	[…] more attention should be given to the broader impacts of product lifetime through the life cycle. Such attention should first start at the management level. Strategies to improve overall performance should be reflected in business models and communicated downstream, injected into the tactical and operational levels.		x	ecodesign should be implemented at the management level			x			-	x
2016	Rivera, Lallmahomed	EU	Environmental implications of planned obsolescence and product lifetime: a literature review	Journal Publication	International Journal of Sustainable Engineering	Combine two previously unrelated fields or concepts	Business models should clearly define the path and role of design in order to facilitate the translation of the strategies into action. […] It is expected that new business models will trigger changes in other business models along the supply chain and service provider networks.		x	business models for ecodesign should clearly define the role of design			x		x	-	x
2016	Rivera, Lallmahomed	EU	Environmental implications of planned obsolescence and product lifetime: a literature review	Journal Publication	International Journal of Sustainable Engineering	Combine two previously unrelated fields or concepts	To concretize the business models, designers and engineers should be given proper tools and opportunities to inform decision-making. An initial step may include a look at design tools and methods, role of policy, customer perception and cultural factors. Ease of usability, adaptation and modularity of design tools should be elements considered when tools are developed or selected.		x	practitioners require proper tools to support decision making			x	x		-	x
2016	Rivera, Lallmahomed	EU	Environmental implications of planned obsolescence and product lifetime: a literature review	Journal Publication	International Journal of Sustainable Engineering	Combine two previously unrelated fields or concepts	More cooperation is needed from industry to gain a better understanding of knowledge flows, products performance data and close-loop knowledge […]		x	ecodesign efforts need to be accompanied by knowledge sharing and cooperation across departments and along the supply chain			x		x	-	x
2016	Rivera, Lallmahomed	EU	Environmental implications of planned obsolescence and product lifetime: a literature review	Journal Publication	International Journal of Sustainable Engineering	Combine two previously unrelated fields or concepts	The effect of marketing on product lifetime should also be studied.		x	future research should focus on the effect of marketing on product lifetime			x		x	-	x
2016	Rivera, Lallmahomed	EU	Environmental implications of planned obsolescence and product lifetime: a literature review	Journal Publication	International Journal of Sustainable Engineering	Combine two previously unrelated fields or concepts	Businesses sell more goods to ensure their longevity as producers. A combination of low price and short life makes the ideal scenario for businesses to exploit product obsolescence. New challenges associated with resource scarcity are expected to force businesses to novel business models that look deeply at the way they create, deliver and capture value from a system perspective. Landfill space i…		x	new business models can support resource efficient value creation			x		x	-	x
2016	Rivera, Lallmahomed	EU	Environmental implications of planned obsolescence and product lifetime: a literature review	Journal Publication	International Journal of Sustainable Engineering	Combine two previously unrelated fields or concepts	Case studies are needed to provide the necessary evidence to judge to what level the development process could be improved by considering the factors described in this manuscript.		x	case studies are needed to validate theoretical findings			x			-	x
2016	Rodrigues, Pigosso, McAloone	EU	Process-related key performance indicators for measuring sustainability performance of ecodesign implementation into product development	Journal Publication	Journal of Cleaner Production	Combine two previously unrelated fields or concepts	[…] ecodesign performance is also constrained into product-related indicators and the pure environmental performance […]	x		ecodesign performance is currently assessed only by product related indicators, which only assess environmental performance			x	x		Ecodesign	x
2016	Rodrigues, Pigosso, McAloone	EU	Process-related key performance indicators for measuring sustainability performance of ecodesign implementation into product development	Journal Publication	Journal of Cleaner Production	Combine two previously unrelated fields or concepts	[…] there is neither consensus nor clear definitions on process vs. product indicators for product develop- ment, which leads to a somewhat fuzzy distinction and understanding of theses types of indicators […]	x		the distinction between process- and product related key performance indicators (KPI) for product development is currently quite fuzzy			x	x		Ecodesign	x
2016	Rodrigues, Pigosso, McAloone	EU	Process-related key performance indicators for measuring sustainability performance of ecodesign implementation into product development	Journal Publication	Journal of Cleaner Production	Combine two previously unrelated fields or concepts	[…] environmental performance is currently outside of focus in terms of process-related indicators, since product development processes are usually taken as intangible and uncertain.	x		process-related key performance indicators (KPI) currently do not cover environmental performance			x	x		Ecodesign	x
2016	Rodrigues, Pigosso, McAloone	EU	Process-related key performance indicators for measuring sustainability performance of ecodesign implementation into product development	Journal Publication	Journal of Cleaner Production	Combine two previously unrelated fields or concepts	[research gap:] widening the scope of the literature review to cover corporate and practitioner-oriented sources to include highlights and insights from practice, which could potentially lead to a higher number of indicators […]		x	the review on key performance indicators (KPI) should include more practice oriented literature			x	x		Ecodesign	x
2016	Rodrigues, Pigosso, McAloone	EU	Process-related key performance indicators for measuring sustainability performance of ecodesign implementation into product development	Journal Publication	Journal of Cleaner Production	Combine two previously unrelated fields or concepts	[research gap:] subject the KPIs [key performance indicators] definition and systematization to a panel of experts in the fields of product development, ecodesign and performance measurement.		x	key performance indicators' (KPI) definitions and systematization should be reviewed by experts			x	x		Ecodesign	x
2016	Rodrigues, Pigosso, McAloone	EU	Process-related key performance indicators for measuring sustainability performance of ecodesign implementation into product development	Journal Publication	Journal of Cleaner Production	Combine two previously unrelated fields or concepts	[…] more focus should be posed on process-oriented and sustainability-based indicators, covering aspects and dimensions beyond the ecodesign effects on product environmental performance.		x	more key performance indicators (KPI) should focus on processes and all three dimensions of sustainability			x	x		Ecodesign	x
2016	Rodrigues, Pigosso, McAloone	EU	Process-related key performance indicators for measuring sustainability performance of ecodesign implementation into product development	Journal Publication	Journal of Cleaner Production	Combine two previously unrelated fields or concepts	[...] research points to important sustainability benefits derived directly from the conceptualization and imple- mentation of new business models (e.g. offering a combination of products and services etc.) and tackling fundamental and challenging social issues (e.g. creating business value that is simultaneously shared with underprivileged communities and regions etc.).		x	ecodesigned products need to be accompanied by complementary business models, and vice versa			x		x	Ecodesign	x
2016	Rossi, Germani, Zamagni	EU	Review of ecodesign methods and tools. Barriers and strategies for an effective implementation in industrial companies	Journal Publication	Journal of Cleaner Production	Review methods and tools	[…] despite the great number of approaches proposed by researchers in this field and available in commercial tools, companies still have difficulty in their practical and effective implementation and use. A further aspect confirming this statement is the large number of research works attempt tries to identify these barriers through direct survey and communication with companies. The results of t…	x		many ecodesign tools exist, their implementation by companies remains limited			x	x		Ecodesign	x
2016	Rossi, Germani, Zamagni	EU	Review of ecodesign methods and tools. Barriers and strategies for an effective implementation in industrial companies	Journal Publication	Journal of Cleaner Production	Review methods and tools	[...] the general tendency is shifted from the objective of proposing correct and detailed methods and tools that, in theory, consider ecodesign issues in the most exhaustive way to the identification of strategies that allow companies to implement eco sustainable concepts in the best way, taking into account all of the limitations and constraints that are present in the complex and real companie…	x		simplified methods and tools can ease ecodesign implementation			x	x		Ecodesign	x
2016	Rossi, Germani, Zamagni	EU	Review of ecodesign methods and tools. Barriers and strategies for an effective implementation in industrial companies	Journal Publication	Journal of Cleaner Production	Review methods and tools	[…] researchers should also be oriented toward the comprehension of the real needs of industrial companies, which at the moment are not included in the tool and method development process. In addition, because in- dustry is forced to respect legislations and standards for some parameters, tools and methods should include and support their direct control to become more useful and more attractive f…		x	companies should be involved in the development of ecodesign tools and methods			x	x		Ecodesign	x
2016	Rossi, Germani, Zamagni	EU	Review of ecodesign methods and tools. Barriers and strategies for an effective implementation in industrial companies	Journal Publication	Journal of Cleaner Production	Review methods and tools	The increased relevance of the role played by the eco-design interventions will be supported by the availability of common and robust life cycle-based method for evaluating the environmental performances of products and technologies since the design phase. [...] Being an harmonised methods, which is expected to ease the adoption and implementation of LCA [life cycle assessment] into the day-by-da…		x	a harmonized life cycle assessmend (LCA) method will benefit the implementation of ecodesign			x	x		Ecodesign	x
2016	Rossi, Germani, Zamagni	EU	Review of ecodesign methods and tools. Barriers and strategies for an effective implementation in industrial companies	Journal Publication	Journal of Cleaner Production	Review methods and tools	[...] the market for green product has been increasing in the last years, just defining a new trajectory: the environmental aspects are not anymore a burden for the companies, but represent a value added, on which competitiveness in the market can and will be based.	x		the market for ecodesigned products is growing		x	x			Ecodesign	x
2016	Rossi, Germani, Zamagni	EU	Review of ecodesign methods and tools. Barriers and strategies for an effective implementation in industrial companies	Journal Publication	Journal of Cleaner Production	Review methods and tools	[...] the provision of suitable methods, tools and market incentives is a major step forward for spreading the use of the eco-design approach, but it has to be supported and accompanied by a new attitude within the companies, in which cooperation among the different functions and departments, the sharing of knowledge and the structuring of the available information also within the whole value cha…		x	ecodesign efforts need to be accompanied by knowledge sharing and cooperation across departments and along the supply chain			x		x	Ecodesign	x
2016	Thomé, Scavarda, Ceryno, Remmen	LA	Sustainable new product development: a longitudinal review	Journal Publication	Clean Technologies and Environmental Policy	Provide a general / historical overview of the field	Based on the positioning in time of the themes related to SNPD [sustainable new product development], it seems that the field started with concerns for the economy and the environment from the beginning. However, the integration of the human and the social aspects of the TBL [triple bottom line] in SNPD deserves further research. Although it is a constant theme, it appears with weak ties and asso…		x	ecodesign first focused on the environmental and economic dimension of sustainability, and later began to include social aspects as well	x	x				Sustainable Product Development	x
2016	Thomé, Scavarda, Ceryno, Remmen	LA	Sustainable new product development: a longitudinal review	Journal Publication	Clean Technologies and Environmental Policy	Provide a general / historical overview of the field	[...] themes related to sustainable products (NPD [new product development], sustainable product and process design, manufacturing, and production processes), product life cycle (aspects related to innovation, green products, environmental regulations, and economy), and product design (eco-design, green design, consumer products, and bioprocesses) are central to the research domain, but they are …	x		themes related to ecodesign are still not well developed		x				Sustainable Product Development	x
2016	Thomé, Scavarda, Ceryno, Remmen	LA	Sustainable new product development: a longitudinal review	Journal Publication	Clean Technologies and Environmental Policy	Provide a general / historical overview of the field	Looking ahead, it is expected that the field would display more research on the social and human component of TBL [triple bottom line], integrating the users and stakeholders’ perspectives on SNPD [sustainable new product development].		x	future research should focus on addressing the social dimension of sustainability			x			Sustainable Product Development	x
2016	Zetterlund, Hallstedt, Broman	EU	Implementation Potential of Sustainability-oriented Decision Support in Product Development	Conference Proceeding	Proceedings from the 26th CIRP Design Conference	Identify barriers / requirements / success factors for successful ecodesign implementation	[Category 1:] methods/tools with an explicit and original purpose to support sustainability considerations in product development often have a low level of implementation for this purpose […]	x		ecodesign methods and tools have a low level of implementation in companies			x	x		-	x
2016	Zetterlund, Hallstedt, Broman	EU	Implementation Potential of Sustainability-oriented Decision Support in Product Development	Conference Proceeding	Proceedings from the 26th CIRP Design Conference	Identify barriers / requirements / success factors for successful ecodesign implementation	[Category 2:] methods/tools that are fairly well implemented in the general operations of companies often have a low level of implementation in product development, with the exception of methods/tools within risk management.	x		in companies, risk management is the only method that is well implemented both in general and within product development			x	x	x	-	x
2016	Zetterlund, Hallstedt, Broman	EU	Implementation Potential of Sustainability-oriented Decision Support in Product Development	Conference Proceeding	Proceedings from the 26th CIRP Design Conference	Identify barriers / requirements / success factors for successful ecodesign implementation	Aspects of ecological sustainability are included in the methods/tools in category 1 and often to some degree in the methods/tools in category 2. In both categories there is a need to improve the inclusion of the social dimension and the economic (strategic) dimension of sustainability. The adaption to use in practice is also poor for most methods/tools in category 1.	x		most methods and tools are poorly adapted to use in practice and lack the social and economic dimension of sustainability			x	x		-	x
2016	Zetterlund, Hallstedt, Broman	EU	Implementation Potential of Sustainability-oriented Decision Support in Product Development	Conference Proceeding	Proceedings from the 26th CIRP Design Conference	Identify barriers / requirements / success factors for successful ecodesign implementation	[...] select the methods/tools in category 1 that have the most complete and science-based integration of the full scope of sustainability, investigate why the implementation of these methods/tools is low (perhaps related to practical applicability) and try to amend the weaknesses [...]		x	future research should focus on selecting the methods and tools with the most complete and science-based integration of all three dimensions of sustainability and addressing their weaknesses that hinder adoption			x	x		-	x
2016	Zetterlund, Hallstedt, Broman	EU	Implementation Potential of Sustainability-oriented Decision Support in Product Development	Conference Proceeding	Proceedings from the 26th CIRP Design Conference	Identify barriers / requirements / success factors for successful ecodesign implementation	[…] further investigate the possibilities to integrate the full scope of sustainability into the methods/tools in category 2 and the possibilities for implementing them in product development. The most low-hanging fruit is probably to focus on the well-established area of risk management together with continues development of defining sustainability criteria to be used in product requirements set…		x	future research should focus on extending risk management methods and tools to include sustainability criteria			x	x	x	-	x
2017	Brones, de Carvalho, de Senzi Zancul	LA	Reviews, action and learning on change management for ecodesign transition	Journal Publication	Journal of Cleaner Production	Combine two previously unrelated fields or concepts	Although a consistent prescriptive change model is still lacking in ecodesign literature, a strong convergence and complementarity is observed between the previous conclusions on ecodesign integration models and the emerging Transition Management approach designed for the sustainability issues faced by organisations.	x		ecodesign and change management complement each other			x		x	Ecodesign	x
2017	den Hollander, Bakker, Hultink	EU	Product Design in a Circular Economy: Development of a Typology of Key Concepts and Terms	Journal Publication	Journal of Industrial Ecology	Compare different concepts / definitions / terminology	Accepting that waste is not an option in a CE [circular economy], we consider that prolonging and extending useful lifetime by preserving embedded economic value is the most effective way to preserve resources. This leads to the redefinition of product lifetime and EoL [end of life] and to the introduction of the Inertia Principle and the concept of product integrity.	x		extending useful product lifetime is the most effective way to preserve resources			x			-	x
2017	den Hollander, Bakker, Hultink	EU	Product Design in a Circular Economy: Development of a Typology of Key Concepts and Terms	Journal Publication	Journal of Industrial Ecology	Compare different concepts / definitions / terminology	The ultimate goal of design for product integrity is to minimize and ideally eliminate environmental costs by preserving or restoring the product’s added economic value over time. Extended product lifetimes, however, do not always result in a net reduction of environmental load. Over time, newer versions of products may be developed that incorporate more efficient technologies. From that moment o…	x		extended product lifetime might increase its environmental impact			x			-	x
2017	den Hollander, Bakker, Hultink	EU	Product Design in a Circular Economy: Development of a Typology of Key Concepts and Terms	Journal Publication	Journal of Industrial Ecology	Compare different concepts / definitions / terminology	It is, by definition, impossible to objectively state whether a product is obsolete or not—subjectivity is at the heart of the definition of obsolescence and therefore at the heart of the definition of product lifetime. Obsolescence is largely in the eye of the beholder. [...] Even when the overall intention of design for product integrity is clear, the subjective nature of obsolescence can make …	x		product obsolescence is subjective			x			-	x
2017	den Hollander, Bakker, Hultink	EU	Product Design in a Circular Economy: Development of a Typology of Key Concepts and Terms	Journal Publication	Journal of Industrial Ecology	Compare different concepts / definitions / terminology	A design that facilitates, for instance, maintenance or repair for one actor can turn out to be impossible to maintain or repair for the other. [...] Product designers aiming to design for maintenance and/or repair need to ask the question: Who will perform the maintenance or repair and where? [...] This may, for instance, determine to what extent a manufacturer chooses to limit or allow access t…		x	business models for ecodesign need to include strategies for reverse logistics			x		x	-	x
2017	den Hollander, Bakker, Hultink	EU	Product Design in a Circular Economy: Development of a Typology of Key Concepts and Terms	Journal Publication	Journal of Industrial Ecology	Compare different concepts / definitions / terminology	A business built around long-life products and recovered resources cannot operate without products that support that strategy, preferably by intention and design. For product designers, changes in business model could result in product design briefs that contrast starkly to those for the linear economy throw-away products. Although this might seem a daunting prospect at first, it also increases t…	x		ecodesigned products need to be accompanied by complementary business models, and vice versa			x		x	-	x
2017	den Hollander, Bakker, Hultink	EU	Product Design in a Circular Economy: Development of a Typology of Key Concepts and Terms	Journal Publication	Journal of Industrial Ecology	Compare different concepts / definitions / terminology	To conclude, in a CE [circular economy], with waste no longer an option, recovery of (p)resources is bound to become more important. Future research could focus on how to improve the quality of the decisions how to manage and recover (p)resources over time. We expect that this will become a discriminating factor for the success of business strategies and thus product design strategies.		x	future research should focus on how to improve decision making in managing and recovering physical resources			x			-	x
2017	Melander	EU	Achieving Sustainable Development by Collaborating in Green Product Innovation	Journal Publication	Business Strategy and the Environment	Combine two previously unrelated fields or concepts	Collaboration in GPI [green product innovation] seems to be mostly with suppliers and customers. Suppliers provide new technology, material and knowledge, while customers are important for product and market demands. […] There is a trend of supply chain collaboration and building networks of collaboration partners [...]. As more collaboration partners are sought, there is a need to perform rigoro…	x		collaborative ecodesign efforts seem to be mostly along the supply chain		x			x	Green Product Innovation	x
2017	Melander	EU	Achieving Sustainable Development by Collaborating in Green Product Innovation	Journal Publication	Business Strategy and the Environment	Combine two previously unrelated fields or concepts	The review points to gaps in the literature on drivers and inter- and intra-firm factors in collaborative GPI [green product innovation]. While the importance of drivers to collaborative GPI is discussed in the review, there is no study of which drivers may be more or less influential depending on the industries in which the firms operate.	x		there is limited knowledge on the drivers in collaborative ecodesign efforts			x			Green Product Innovation	x
2017	Melander	EU	Achieving Sustainable Development by Collaborating in Green Product Innovation	Journal Publication	Business Strategy and the Environment	Combine two previously unrelated fields or concepts	As for inter-firm collaboration, the study points to contradicting results on the benefits of collaboration in GPI [green product innovation]. Numerous studies point to benefits of collaborating in GPI […], while the study by Cuerva et al. (2014) shows no such benefits.	x		the benefits of collaborative ecodesign are disputed			x			Green Product Innovation	x
2017	Melander	EU	Achieving Sustainable Development by Collaborating in Green Product Innovation	Journal Publication	Business Strategy and the Environment	Combine two previously unrelated fields or concepts	A wide spectrum of collaboration partners is studied, but there is a lack of studies showing which partners are used for which type of GPI [green product innovation].	x		there is limited knowledge on the individual roles of collaborative ecodesign efforts			x			Green Product Innovation	x
2017	Melander	EU	Achieving Sustainable Development by Collaborating in Green Product Innovation	Journal Publication	Business Strategy and the Environment	Combine two previously unrelated fields or concepts	There is a lack of discussion related to the complex interrelationships in collaborative GPI [green product innovation] and how to involve and manage several actors in the network or along the supply chain in the GPI.	x		there is limited knowledge on how to manage several actors along the supply chain to achieve environmental goals			x			Green Product Innovation	x
2017	Melander	EU	Achieving Sustainable Development by Collaborating in Green Product Innovation	Journal Publication	Business Strategy and the Environment	Combine two previously unrelated fields or concepts	[…] there is little discussion on the interrelationships of product innovation and process innovation […] in relation to GPI [green product innovation], as well as the implication for collaborators in design for remanufacturing in GPI.	x		there is limited knowledge on the interrelationship of product and process innovation			x			Green Product Innovation	x
2017	Melander	EU	Achieving Sustainable Development by Collaborating in Green Product Innovation	Journal Publication	Business Strategy and the Environment	Combine two previously unrelated fields or concepts	With regard to intra-firm factors, the review shows gaps in the way firms integrate environmental concerns into firm strategies and the implications for collaborative GPI [green product innovation].	x		there is limited knowledge on how companies integrate environmental concerns into their strategy			x			Green Product Innovation	x
2017	Melander	EU	Achieving Sustainable Development by Collaborating in Green Product Innovation	Journal Publication	Business Strategy and the Environment	Combine two previously unrelated fields or concepts	There is also limited focus on environmental capabilities and the way firms manage across functions and share environmental knowledge.	x		there is limited knowledge on companies environmental capabilities and knowledge sharing			x			Green Product Innovation	x
2017	Melander	EU	Achieving Sustainable Development by Collaborating in Green Product Innovation	Journal Publication	Business Strategy and the Environment	Combine two previously unrelated fields or concepts	This study shows that environmental regulation is an important driver for collaborative GPI [green product innovation]. Policies could be aimed at increased environmental regulations and expanding the number of sectors affected by such regulations. In addition, incentives for firms could be developed to increase knowledge about and investment in green technology. [...] Policy could stimulate coll…		x	environmental regulation is an important driver for ecodesign collaboration			x			Green Product Innovation	x
2017	Melander	EU	Achieving Sustainable Development by Collaborating in Green Product Innovation	Journal Publication	Business Strategy and the Environment	Combine two previously unrelated fields or concepts	[...] the implications for practitioners are that collaboration in GPI [green product innovation] is a strategic decision [...] and that firms should aim to invest in long-term collaborations to build trust and enable knowledge sharing. As it is not possible to possess all knowledge internally, firms should seek collaboration partners with innovative and environmental capabilities. Firms also nee…		x	companies should make ecodesign collaborations a strategic decision			x			Green Product Innovation	x
2017	Melander	EU	Achieving Sustainable Development by Collaborating in Green Product Innovation	Journal Publication	Business Strategy and the Environment	Combine two previously unrelated fields or concepts	The review has shown similar results to those of studies of collaborations in regular product innovation, such as the importance of partner selection [...]. Firms want their partners to have both technological and relational capabilities [...] and to be known partners [...]. In addition, early involvement [...] and the importance of internal collaboration [...] are highlighted as important both i…	x		for ecodesign collaborations, companies show similar behavior as during conventional collaborative processes			x			Green Product Innovation	x
2017	Melander	EU	Achieving Sustainable Development by Collaborating in Green Product Innovation	Journal Publication	Business Strategy and the Environment	Combine two previously unrelated fields or concepts	Future studies could compare collaborations in regular product innovation with collaborations in GPI [green product innovation] to investigate possible differences. It could be [...] that GPI should be aligned with product innovation literature. Similarly, collaborative GPI could be aligned with collaborative product innovation literature.		x	future research on ecodesign collaboration should focus on investigating the differences between collaboration during the conventional design process and the ecodesign process			x			Green Product Innovation	x
2017	Melander	EU	Achieving Sustainable Development by Collaborating in Green Product Innovation	Journal Publication	Business Strategy and the Environment	Combine two previously unrelated fields or concepts	[…] researchers could investigate a wider range of partners. Existing studies focus mainly on collaboration with suppliers and/or customers. However, future studies could expand to other types of partner, such as universities, research institutes, competitors and start-ups. A fruitful venue could be environmental NGO [non governmental organization] collaborations [...]		x	future research on ecodesign collaboration should focus on investigating a wider range of partner types			x			Green Product Innovation	x
2017	Melander	EU	Achieving Sustainable Development by Collaborating in Green Product Innovation	Journal Publication	Business Strategy and the Environment	Combine two previously unrelated fields or concepts	There are contradicting results as to how different partners contribute to GPI [green product innovation] [...]. Collaborators could also be compared by investigating where in the innovation process partners contribute and what their main contributions consist of. It would also be interesting to investigate different types of partner configuration, such as dyadic, supply chain or industrial netwo…		x	future research on ecodesign collaboration should focus on partner configuration and individual contributions			x			Green Product Innovation	x
2017	Rousseaux, Gremy-Gros, Bonnin, Henriel-Ricordel, Bernard, Floury, Staigre, Vincent	EU	“Eco-tool-seeker”: A new and unique business guide for choosing ecodesign tools	Journal Publication	Journal of Cleaner Production	Review methods and tools	This classification integrates different types of EDT [ecodesign tools]: 36.6% normative tools and 63.4% non-normative tools. These tools can be classified as generic (48%) or sectorial (52%) as well as “environmental” or “improvement” tools. [...]	x		there are roughly as many sector-specific ecodesign tools as there are generic ones				x		Ecodesign	x
2017	Rousseaux, Gremy-Gros, Bonnin, Henriel-Ricordel, Bernard, Floury, Staigre, Vincent	EU	“Eco-tool-seeker”: A new and unique business guide for choosing ecodesign tools	Journal Publication	Journal of Cleaner Production	Review methods and tools	A great variety of ecodesign tools exists but the actual implementation level of such tools remains limited or not successfully integrated throughout the different company processes.	x		many ecodesign tools exist, their implementation by companies remains limited			x	x		Ecodesign	x
2017	Tecchio, McAlister, Mathieux, Ardente	EU	In search of standards to support circularity in product policies: A systematic approach	Journal Publication	Journal of Cleaner Production	Introduce a new framework	[...] the material efficiency of products can be boosted by setting policy regulations, that aim to address topics such as durability, upgradability, reparability, reusability, as well as recoverability and recyclability, trying to prioritize those aspects that eliminate, or at least minimize, loss of materials and waste generation. Requirements and standards dealing with material efficiency woul…	x		requirements and standards for material efficiency would benefit the adoption of ecodesign practices			x			Ecodesign	x
2017	Tecchio, McAlister, Mathieux, Ardente	EU	In search of standards to support circularity in product policies: A systematic approach	Journal Publication	Journal of Cleaner Production	Introduce a new framework	One of the reasons for the relative lack of ecodesign requirements related to material efficiency in the implementing measures adopted so far is the absence of adequate metrics and standards for assessing material efficiency aspects identified in previous product specific Ecodesign implementing measures.	x		the lack of ecodesign requirements can be explained by the absence of adequate metrics and standards for assessing material efficiency			x	x		Ecodesign	x
2017	Tecchio, McAlister, Mathieux, Ardente	EU	In search of standards to support circularity in product policies: A systematic approach	Journal Publication	Journal of Cleaner Production	Introduce a new framework	Another more general reason [for the lack of ecodesign requirements related to material efficiency] is that radical changes proposed to shift from the paradigm of “sell more, sell faster” have gained little traction, perhaps also because those theories are often correlated to concepts such as population control and zero-growth at a global scale. Engineers and designers are often accustomed to tra…	x		the lack of regulatory ecodesign requirements can be explained by the clash of proposed radical changes with conventional business models, mindsets and paradigms			x			Ecodesign	x
2017	Tecchio, McAlister, Mathieux, Ardente	EU	In search of standards to support circularity in product policies: A systematic approach	Journal Publication	Journal of Cleaner Production	Introduce a new framework	Enhanced recycling is clearly seen as an important step towards a more circular economy. However, as stated in the International Resource Panel report, “governments are becoming increasingly aware of the benefits of moving upwards through the resource management hierarchy, and seeing [recycling] policy not just as a fixed target, but as a transition path” [...]. It can be concluded that policy go…		x	recycling can be seen as a transition path towards extending product lifetime and reducing embodied product impacts			x			Ecodesign	x
2017	Tecchio, McAlister, Mathieux, Ardente	EU	In search of standards to support circularity in product policies: A systematic approach	Journal Publication	Journal of Cleaner Production	Introduce a new framework	Positive and concrete examples of circular business models already exist. Strategies such as design for durability, design for ease of maintenance and repair, design for upgradability, design for disassembly and reassembly are creating new business opportunities, pushing competitors to reconsider their way to design products.	x		positive examples of circular business models already exist			x		x	Ecodesign	x
2017	Tecchio, McAlister, Mathieux, Ardente	EU	In search of standards to support circularity in product policies: A systematic approach	Journal Publication	Journal of Cleaner Production	Introduce a new framework	The involvement of policy makers and ESOs [European standards organizations] is necessary to develop standards, taking into account the full range of possible material efficiency considerations, in order to ensure that future policies deliver effectively on circular economy goals.	x		involving policy makers and standards organizations is necessary to develop effective goals for material efficiency			x			Ecodesign	x
2018	Ahmad, Wong, Tseng, Wong	Asia	Sustainable product design and development: A review of tools, applications and research prospects	Journal Publication	Journal of Cleaner Production	Review methods and tools	[…] most of the reviewed tools were [tools which only address two dimensions of sustainability]. There were also more case studies on such tools.	x		most tools address only two dimensions of sustainability				x		Sustainable Product Design	x
2018	Ahmad, Wong, Tseng, Wong	Asia	Sustainable product design and development: A review of tools, applications and research prospects	Journal Publication	Journal of Cleaner Production	Review methods and tools	[…] the majority of the [tools which only address two dimensions of sustainability] were useful at early design stages.	x		most tools addressing only two dimensions of sustainability are used during early design stages				x		Sustainable Product Design	x
2018	Ahmad, Wong, Tseng, Wong	Asia	Sustainable product design and development: A review of tools, applications and research prospects	Journal Publication	Journal of Cleaner Production	Review methods and tools	[…] most of the [tools which only address two dimensions of sustainability] included a life cycle perspective.	x		most tools addressing only two dimensions of sustainability include a life cycle perspective				x		Sustainable Product Design	x
2018	Ahmad, Wong, Tseng, Wong	Asia	Sustainable product design and development: A review of tools, applications and research prospects	Journal Publication	Journal of Cleaner Production	Review methods and tools	[…] the [tools addressing all three dimensions of sustainability] were still immature and many of them were simply a proposal or conceptual framework. More research work is needed to develop such tools into standard SPD [sustainable product development] tools.		x	more research is needed to refine tools that address all three dimensions of sustainability			x	x		Sustainable Product Design	x
2018	Ahmad, Wong, Tseng, Wong	Asia	Sustainable product design and development: A review of tools, applications and research prospects	Journal Publication	Journal of Cleaner Production	Review methods and tools	Although most of the [tools addressing all three dimensions of sustainability] were also centered on a life cycle approach, some of them were used at a later design stage due to the requirement for a huge number of data and information.	x		tools that require detailed data tend to be used during later design stages				x		Sustainable Product Design	x
2018	Ahmad, Wong, Tseng, Wong	Asia	Sustainable product design and development: A review of tools, applications and research prospects	Journal Publication	Journal of Cleaner Production	Review methods and tools	In summary, the [reviewed] tools were based on multidisciplinary integration to achieve more benefits, but this integration also brought many challenges and hurdles. The successful implementation of these tools would require researchers to address the methodological issues of the tools, governments to allocate resources and facilitate the development of databases, academics to produce sustainabil…		x	support by researchers, governments, educators and practitioners is required to succefully integrate multidisciplinary ecodesign tools			x	x		Sustainable Product Design	x
2018	de Medeiros, Lago, Colling, Ribeiro, Marcon	LA	Proposal of a Novel Reference System for the Green Product Development Process (GPDP)	Journal Publication	Journal of Cleaner Production	Introduce a new framework	[...] environmental issues are still not a dominant topic in product development practices, and there is great potential for the inclusion of these practices in distinct phases of the PDP [product development process], mainly in the phases before concept generation and in the post-launch phases.	x		there is still great potential for including environmental considerations into the product development process (PDP)		x	x			Green Product Development	x
2018	de Medeiros, Lago, Colling, Ribeiro, Marcon	LA	Proposal of a Novel Reference System for the Green Product Development Process (GPDP)	Journal Publication	Journal of Cleaner Production	Introduce a new framework	[...] operational and strategic matters previously highlighted by academic research on environmentally sustainable product development process are already considered by SME [small and medium sized enterprizes]. Among these activities, we highlight the ecologic integration in the project planning and production planning steps, and a strategic planning that contemplates sustainability. Yet, another…	x		small and medium sized enterprizes (SMEs) already consider ecodesign to some extent, but are not aware of many existing methods and tools			x	x		Green Product Development	x
2018	Gbededo, Liyanage, Garza-Reyes	EU	Towards a Life Cycle Sustainability Analysis: A Systematic Review of Approaches to Sustainable Manufacturing	Journal Publication	Journal of Cleaner Production	Compare different concepts / definitions / terminology	[...] the focus of the current research towards sustainable manufacturing is categorised into two major approaches; 1) the approaches that focus on the process, system or product’s sustainability assessment in order to support decision-making, and 2) those that focus on innovative design or continuous improvement for sustainable process, system or product. The two categories are, however, faced w…	x		ecodesign approaches can be classified into those that support sustainability assessment and those that focus on innovative design			x	x		Sustainable Manufacturing	x
2018	Gbededo, Liyanage, Garza-Reyes	EU	Towards a Life Cycle Sustainability Analysis: A Systematic Review of Approaches to Sustainable Manufacturing	Journal Publication	Journal of Cleaner Production	Compare different concepts / definitions / terminology	[...] most of the approaches lack of a holistic view and LCSA [life cycle sustainability assessment] is still in an immature stage. Most of the authors focus on competitive manufacturing integrated with environmentally sustainable innovations, while other authors underscored the importance of holistic assessment of the three sustainability dimensions. As posited by many authors, sustainable devel…	x		not taking into account the interdependencies of the different dimensions of sustainability results in uninformed decision making			x			Sustainable Manufacturing	x
2018	Gbededo, Liyanage, Garza-Reyes	EU	Towards a Life Cycle Sustainability Analysis: A Systematic Review of Approaches to Sustainable Manufacturing	Journal Publication	Journal of Cleaner Production	Compare different concepts / definitions / terminology	[…] there is still a clear gap for research on the issues of the influence of one sustainability dimension on the other across a product lifecycle, especially when assessing the sustainability of a process or product under design.		x	future research should study the influence of one sustainability dimension on the others across a product's life cycle			x			Sustainable Manufacturing	x
2018	Gbededo, Liyanage, Garza-Reyes	EU	Towards a Life Cycle Sustainability Analysis: A Systematic Review of Approaches to Sustainable Manufacturing	Journal Publication	Journal of Cleaner Production	Compare different concepts / definitions / terminology	Another obvious gap in the current research is the challenge of aggregating and translating various social aspects from qualitative to quantitative weighted values and the study of their influence on and interdependencies with the economic and environmental dimensions. Although UNEP (2009) has published guidelines for social LCA [life cycle assessment] of products, the major challenge in S-LCA st…	x		classification and quantification of social criteria remains a challenge in social life cycle assessment (S-LCA)			x	x		Sustainable Manufacturing	x
2018	Sonego, Echeveste, Debarba	LA	The role of modularity in sustainable design: A systematic review	Journal Publication	Journal of Cleaner Production	Combine two previously unrelated fields or concepts	[...] benefits [of modularity] are claimed in every life cycle phase (production, use, and disposal) [...] modularity is associated with sustainable design through a variety of benefits. [...] the benefits of modularity are asserted by literature throughout the entire product life cycle [...]	x		modular product design has potential benefits throughout the entire product life cycle			x		x	Sustainable Design	x
2018	Sonego, Echeveste, Debarba	LA	The role of modularity in sustainable design: A systematic review	Journal Publication	Journal of Cleaner Production	Combine two previously unrelated fields or concepts	[…] academic research is mainly focused in the production phase and in projecting product disposal scenarios, offering a wide variety of methods and methodologies to modularize products with environmental concerns. [...] the predominance of methods papers shows that research is concentrated in the production phase.	x		research on modular product design is focused on the production phase			x		x	Sustainable Design	x
2018	Sonego, Echeveste, Debarba	LA	The role of modularity in sustainable design: A systematic review	Journal Publication	Journal of Cleaner Production	Combine two previously unrelated fields or concepts	[…] modularity could also present limitations, and the realization of its benefits is partially influenced by user's decisions.	x		the benefits of modular product design are limited by the user's influence			x		x	Sustainable Design	x
2018	Sonego, Echeveste, Debarba	LA	The role of modularity in sustainable design: A systematic review	Journal Publication	Journal of Cleaner Production	Combine two previously unrelated fields or concepts	In 2003, Gershenson et al. discussed the lack of experiments to prove and quantify the benefits claimed by modular design; despite all the work and research since, this lack of evidence seems to stand. In future work, it is paramount that researchers and designers develop improved understanding of the entire life cycle to better conceive modular products, and to be able to decide whether and whic…		x	future research needs to validate the sustainability potential of modular product design			x		x	Sustainable Design	x
2018	Watz, Hallstedt	EU	Integrating Sustainability in Product Requirements	Conference Proceeding	International Design Conference - Design 2018	Identify barriers / requirements / success factors for successful ecodesign implementation	In line with previous research, the importance of sustainability and how it should be integrated in the organisation is decided at a strategic decision level. Practical guidelines and systems to link the strategic objectives are formalised on a tactical decision level, as a means for communication. Product requirements can be interpreted as the operational means for guidance towards the business …	x		in a company, sustainability is implemented at the strategic level, guidelines put in place at the tactical level and product requirements defined at the operational level			x			-	x
2018	Watz, Hallstedt	EU	Integrating Sustainability in Product Requirements	Conference Proceeding	International Design Conference - Design 2018	Identify barriers / requirements / success factors for successful ecodesign implementation	There are [...] two main approaches to manage integration of sustainability criteria into the product requirements; i) as separate requirements such as complying with certain legislations and regulations, or ii) by relating sustainability criteria to traditional design requirements, e.g., relating "reduce material usage" to "low product weight" in a QFD [quality function deployment] [...]	x		there are two main approaches for integrating sustainability into product requirements: formulating them as separate requirements or relating them to traditional design requirements			x			-	x
2018	Watz, Hallstedt	EU	Integrating Sustainability in Product Requirements	Conference Proceeding	International Design Conference - Design 2018	Identify barriers / requirements / success factors for successful ecodesign implementation	[...] most of the articles focused on the environmental aspects of sustainability [...]	x		most articles focus on the environmental aspects of sustainability		x				-	x
2018	Watz, Hallstedt	EU	Integrating Sustainability in Product Requirements	Conference Proceeding	International Design Conference - Design 2018	Identify barriers / requirements / success factors for successful ecodesign implementation	[…] the process for identifying sustainability criteria can be divided into two main perspectives: i) an environmental life-cycle assessment focus from which important sustainability aspects or eco-design strategies could be derived and integrated, or used to formulate separate sustainability requirements; and ii) an ad-hoc approach where no systematic strategy supported the selection of sustaina…	x		there is a gap between tactical and operational ecodesign efforts			x			-	x
2018	Watz, Hallstedt	EU	Integrating Sustainability in Product Requirements	Conference Proceeding	International Design Conference - Design 2018	Identify barriers / requirements / success factors for successful ecodesign implementation	[…] tools on the operational level have most room for improvements. For example, tools for requirements generation lack a full sustainability perspective and have a tendency to lack a strategic process for defining suitable sustainability criteria and indicators to be integrated in the requirement list.	x		tools on the operational level have most room for improvement			x	x		-	x
2018	Watz, Hallstedt	EU	Integrating Sustainability in Product Requirements	Conference Proceeding	International Design Conference - Design 2018	Identify barriers / requirements / success factors for successful ecodesign implementation	[…] it is possible to obtain strategic sustainability criteria and indicators based on a full sustainability perspective. Since it is impossible to predict all future effects of unsustainable development, further research will focus on identifying and verifying sustainability indicators that can help companies to contribute to a sustainable development, and how these indicators can be implemented…		x	future research should identify and verify sustainability criteria that can help companies contribute to sustainable development			x			-	x
2018	Watz, Hallstedt	EU	Integrating Sustainability in Product Requirements	Conference Proceeding	International Design Conference - Design 2018	Identify barriers / requirements / success factors for successful ecodesign implementation	Several operational matrix approaches, of which QFD [quality function deployment] was the most frequent tool, show that it can be possible to integrate sustainability criteria through correlation with traditional design requirements. From the results obtained in this study it is therefore proposed that sustainability is integrated in product requirements through a strategic approach that: i) defi…	x		it is possible to integrate sustainability critera through correlation with traditional design requirements, e.g. by using quality function deployment (QFD)			x	x	x	-	x
2018	Watz, Hallstedt	EU	Integrating Sustainability in Product Requirements	Conference Proceeding	International Design Conference - Design 2018	Identify barriers / requirements / success factors for successful ecodesign implementation	[…] future research will further investigate how sustainability criteria influence traditional design requirements and what the impact is from a selected design solution and from a sustainability perspective, e.g., via system dynamics modelling […] A deeper understanding of these relations, and of the possibility to visualise and communicate these, could further be assessed considering their infl…		x	investigate how sustainability criteria influence design requirements and employ system dynamics modeling			x	x		-	x
2018	Watz, Hallstedt	EU	Integrating Sustainability in Product Requirements	Conference Proceeding	International Design Conference - Design 2018	Identify barriers / requirements / success factors for successful ecodesign implementation	The literature review results also contained a range of different efforts that apply Theory of Inventive Solving (TRIZ) or Algorithm of Inventive Solving (ARIZ) to support concept generation in the complex decision situation [...] Fuzzy logic to handle the uncertainty of variables [...] and Multicriteria Decision Making to support ranking between design concepts or requirements [...]. Future rese…		x	investigate how TRIZ, ARIZ and fuzzy logic can contribute to ecodesign			x	x	x	-	x

## Sheet: P1 - General Overview
Year	Author(s)	Title	What is presented?
1995	Alting, Legarth	Life Cycle Engineering and Design	state of the art in life cycle design/engineering, activity by industry, methods and tools, implementation into the product development process (PDP)
1997	Zhang, Kuo, Lu, Huang	Environmentally conscious design and manufacturing: A state-of-the-art survey	general information, definitions, guidelines, references for research and implementation of environmentally conscious design and manufacturing (ECDM)
1999	Lofthouse, Bhamra, Evans	Effective Ecodesign: Finding a Way Forward for Industry	state of the art and current level of implementation of ecodesign
2000	Roy	Sustainable Product-Service Systems	state of the art of sustainable product service systems (PSS)
2001	Stevels	Application of EcoDesign: ten years of dynamic development	historical development of the field of ecodesign
2002	Baumann, Boons, Bragd	Mapping the green product development field: engineering, policy and business perspectives	mapping the field of ecodesign
2003	Heiskanen, Jalas	Radical Eco-Efficiency: Review of the Debate and Evidence	review of the debate and evidence on eco-efficient services
2003	Sun, Han, Ekwaro-Osire, Zhang	Design for Environment: Methodologies, Tools, and Implementation	methodologies, tools, implementation and future trends of design for environment (DfE)
2004	Bhamra	Ecodesign: the search for new strategies in product development	ecodesign definitions, models, strategies, practice and case studies
2004	Shu-Yang, Freedman, Cote	Principles and practice of ecological design	history, influence, antecedents and principles of ecodesign
2006	Karlsson, Luttropp	EcoDesign: what's happening? An overview of the subject area of EcoDesign and of the papers in this special issue	ecodesign concept, practice, tools, education
2006	Maxwell, Sheate, van der Vorst	Functional and systems aspects of the sustainable product and service development approach for industry	sustainable product and service design (SPSD) concept, approaches, strategies and implementation
2006	Tukker, Tischner	Product-services as a research field: past, present and future. Reflections from a decade of research	historical development of the field and key insights on product service systems (PSS)
2007	Baines, Lightfoot, Steve, Neely, Greenough, Peppard, Roy, Shehab, Braganza, Tiwari, Alcock, Angus, Bastl, Cousens, Irving, Johnson, Kingston, Lockett, Martinez, Michele, Tranfield, Walton, Wilson	State-of-the-art in product-service systems	product service systems (PSS) concept, origin, examples of application, success factors and barriers, tools and methodologies, future research challenges
2007	Boks, Stevels	Essential perspectives for design for environment. Experiences from the electronics industry	key principles for disseminating design for environment (DfE) knowledge
2007	Mulder	Innovation for sustainable development: from environmental design to transition management	levels of technological change, stakeholders, strategies and dilemmas of innovation for sustainable development
2009	Arena, Duque Ciceri, Terzi, Bengo, Azzone, Garretti	A state-of-the-art of industrial sustainability: definitions, tools and metrics	definition of sustainability, how it can be measured and achieved (in an industrial context)
2009	Boks, McAloone	Transitions in sustainable product design research	historical development and transistions in sustainable product design research
2010	Ramani, Ramanujan, Bernstein, Zhao, Sutherland, Handwerker, Choi, Kim, Thurston	Integrated Sustainable Life Cycle Design: A Review	classification of research on sustainable life cycle design (LCD) according to life cycle stages
2012	Hübner	Ecodesign: reach, limits and challenges 20 years of ecodesign - time for a critical reflection	historical development of the field and critical review of the role of ecodesign
2013	Mattioda, Fernandes, Detro, Casela, Canciglieri Junior	Principle of Triple Bottom Line in the Integrated Development of Sustainable Products	review of the principles of triple bottom line (TBL) and the product development process
2015	Tukker	Product services for a resource-efficient and circular economy - A review	review of the literature on product service systems (PSS) and comparison with an earlier review
2016	Thomé, Scavarda, Ceryno, Remmen	Sustainable new product development: a longitudinal review	review of the field of sustainable new product development and bibliographic analysis

## Sheet: P2 - Comparing Concepts
Year	Author(s)	Title	Which concepts are being compared?
1995	van Weenen	Towards sustainable product development	Ecodesign, Design for Environment (DfE), Dematerialization, Material Input per Service (MIPS), Design for Efficient Longevity, Remanufacturing, Ecocycle Society, Sustainable Product Development
1997	Bras	Incorporating Environmental Issues in Product Design and Realization	Design for Manufacture, Design for the Life Cycle, Environmental Engineering, Pollution Prevention, Environmentally Conscious Design and Manufacturing (ECDM), Design for Environment (DfE), Life Cycle Design (LCD), Industrial Ecology, Sustainable Development
2002	Robèrt, Schmidt-Bleek, Aloisi de Larderel, Basile, Jansen, Kuehr, Price Thomas, Suzuki, Hawken, Wackernagel	Strategic sustainable development - selection, design and synergies of applied tools	Factor X, Life Cycle Assessment (LCA), Material Input per Service (MIPS), Total Material Flow (TMF), Environmental Management Systems (EMS), The Natural Step (TNS), Ecological Footprinting, Zero Emissions, Sustainable Technology Development (STD), Cleaner Production, Natural Capitalism
2005	Hauschild, Jeswiet, Alting	From Life Cycle Assessment to Sustainable Production: Status and Perspectives	Life Cycle Assessment (LCA), Design for Environment (DfE), Life Cycle Engineering (LCE)
2005	Jeswiet, Hauschild	EcoDesign and future environmental impacts	Ecodesign, Life Cycle Engineering (LCE)
2009	Coley, Lemon	Exploring the design and perceived benefit of sustainable solutions: a review	Product Service Systems (PSS), Eco-Efficient Product Service Systems, Eco-Efficient Services, Whole System Design (WSD), Solution Oriented Partnerships, Advanced Industrialzed Solutions, Customer Solutions
2015	Gaziulusoy	A critical review of approaches available for design and innovation teams through the perspective of sustainability science and system innovation theories	Design for Eco Innovations (DfEI), Product Service Systems (PSS), Design for the Base of the Pyramid (DfBoP), Biomimicry (BM), Cradle to Cradle (CTC), The Natural Step (TNS)
2016	Ceschin, Gaziulusoy	Evolution of design for sustainability: From product design to design for system innovations and transitions	Green Design, Biomimicry (BM), Ecodesign, Cradle to Cradle (CTC), Emotionally Durable Design, Design for Sustainable Behavior, Design for the Base of the Pyramid (DFBoP), Eco-Efficient Product Service Systems, Sustainable Product Service Systems, Product Service Systems for the Base of the Pyramid, Systemic Design, Design for Sustainable Social Innovation, Design for System Innovations and Transi…
2017	den Hollander, Bakker, Hultink	Product Design in a Circular Economy: Development of a Typology of Key Concepts and Terms	Ecodesign, Circular Product Design, Design for Product Integrity, Design for Recycling, Design for Physical Durability, Design for Emotional Durability, Design for Maintenance, Design for Upgrading, Design for Recontextualizing, Design for Repair, Design for Refurbishment, Design for Remanufacture
2018	Gbededo, Liyanage, Garza-Reyes	Towards a Life Cycle Sustainability Analysis: A Systematic Review of Approaches to Sustainable Manufacturing	Sustainable Product Development, Eco Innovation, Ecodesign, Circular Economy, Design for Environment, Lean Product Development, Green Product Development, Environmental Management Systems (EMS), Corporate Social Responsibility (CSR), Life Cycle Assessment (LCA), Life Cycle Costing (LCC), Social Life Cycle Assessment (S-LCA)

## Sheet: P3 - Combining Two Fields
Year	Author(s)	Title	Which two fields are combined?
2004	Ammenberg, Sundin	Products in environmental management systems: Drivers, barriers and experiences	environmental management systems (EMS) and product development
2006	Boks	The soft side of Ecodesign	ecodesign and social, psychological and intangible processes
2007	Ljungberg	Materials selection and design for development of sustainable products	ecodesign and material selection
2011	Soylu, Dumville	Design for environment: The greening of product and supply chain	ecodesign and supply chain management
2013	Gaha, Benamara, Yannou	Ecodesigning with CAD features: Analysis and proposals	ecodesign and computer aided design (CAD)
2014	Brones, de Carvalho, de Senzi Zancul	Ecodesign in project management: a missing link for the integration of sustainability in product development?	ecodesign and project management
2014	Dunmade	Issues in the sustainability of products designed for multi-lifecycle	ecodesign and design for multiple life cycles
2014	Gremyr, Siva, Raharjo, Goh	Adapting the Robust Design Methodology to support sustainable product development	ecodesign and robust design methodology (RDM)
2014	Johansson, Sundin	Lean and green product development: Two sides of the same coin?	lean and green product development
2015	Go, Wahab, Hishamuddin	Multiple generation life-cycles for product sustainability: The way forward	ecodesign and design for multiple life cycles
2016	Bocken, de Pauw, Bakker, van der Grinten	Product design and business model strategies for a circular economy	product development and business model strategies
2016	Ma, Kremer	A systematic literature review of modular product design (MPD) from the perspective of sustainability	ecodesign and modular product design
2016	Rivera, Lallmahomed	Environmental implications of planned obsolescence and product lifetime: a literature review	ecodesign and planned obsolescence
2016	Rodrigues, Pigosso, McAloone	Process-related key performance indicators for measuring sustainability performance of ecodesign implementation into product development	ecodesign and key performance indicators (KPI)
2017	Brones, de Carvalho, de Senzi Zancul	Reviews, action and learning on change management for ecodesign transition	ecodesign and change management
2017	Melander	Achieving Sustainable Development by Collaborating in Green Product Innovation	ecodesign and collaboration
2018	Sonego, Echeveste, Debarba	The role of modularity in sustainable design: A systematic review	ecodesign and modular product design

## Sheet: P4 - Barriers & Success Factors
Year	Author(s)	Title	How are the identified barriers or success factors structured?
1997	Lenox, Ehrenfeld	Organizing for Effective Environmental Cooperation	Oriented towards company ecodesign capabilities
2002	Johansson	Success factors for integration of ecodesign in product development: A review of state of the art	By area of concern (e.g. management, customer relationship)
2007	Charter	Sustainable Innovation: Key conclusions from Sustainable Innovation Conferences 2003–2006 organised by The Centre for Sustainable Design	By the institutions involved (e.g. research, business)
2009	Albino, Balice, Dangelico	Environmental strategies and green product development: An overview on sustainability-driven companies	By area of concern (e.g. energy efficiency, green supply chain)
2009	Lee-Mortimer, Short	The Product Development Process Roadblock that is Restricting the Widespread Adoption of Design for Sustainability	Arranged along the product development process (PDP)
2009	OECD	Sustainable Manufacturing and Eco-Innovation: Framework, Practices and Measurement	By areas of concern (e.g. indicators, policies)
2011	Val Segarra-Oña, De-Miguel-Molina, Payá-Martínez	A Review Of The Literature On Eco-Design In Manufacturing Industry: Are The Institutions Focusing On The Key Aspects?	By the stage of the ecodesign evolution process a company finds itself in (e.g. "compliance as opportunity", "developing new business models")
2013	de Medeiros, Ribeiro, Cortimiglia	Success factors for environmentally sustainable product innovation: a systematic literature review	By area of concern (e.g. market knowledge, interfunctional collaboration)
2013	Hallstedt, Thompson, Lindahl	Key elements for implementing a strategic sustainability perspective in the product innovation process	By area of concern (e.g. role, tools)
2013	Tonelli, Evans, Taticchi	Industrial sustainability: challenges, perspectives, actions	By the institutions involved (e.g. educators, industrialists)
2014	Baouch, Pourroy, Zwolinski, Brissaud	Identifying the Requirements for a Knowledge-sharing Platform in Ecodesign	By their relationship to knowledge sharing in an organization
2014	Mattioda, Canciglieri Junior, Fernandes, Casela, Mazzi	Thoughts on Product Development Oriented to Sustainability in Organizational Overview	Arranged along the product development process (PDP)
2014	O'Hare, McAloone	Eco-Innovation: The Opportunities for Engineering Design Research	According to research activities (e.g. methodological innovation, collaborative research)
2015	Blok, Long, Gaziulusoy, Ciliz, Lozano, Huisingh, Csutora, Boks	From best practices to bridges for a more sustainable future: Advances and challenges in the transition to global sustainable production and consumption	By roles and activities (e.g. upscaling, production)
2015	Dangelico	Green Product Innovation: Where we are and Where we are Going	By nature of the factor (antecedent, outcome, success factor) and origin (internal, external)
2015	Paulson, Sundin	Challenges and trends within eco-design	By strategic level (e.g. system and success level, tool level)
2016	Zetterlund, Hallstedt, Broman	Implementation Potential of Sustainability-oriented Decision Support in Product Development	Oriented towards company activities (e.g. general operations, product development)
2018	Watz, Hallstedt	Integrating Sustainability in Product Requirements	By company management level (e.g. tactical, operational)

## Sheet: P5 - Methods & Tools
Year	Author(s)	Title	What criteria are used for comparison / what aspects are reviewed?
2003	Ernzer, Lindahl, Masui, Sakao	An international study on utilization of design for environment methods (DfE) - a pre-study	Level of Usage, Requirements
2005	Navarro Rizo, Ceca, Ruiz	Ecodesign Function and Form. Classification of Ecodesign Tools According to Their Functional Aspects	Objective, Life Cycle Stage, Effectiveness, Prerequisites, Resource Requirements, Information Processing, Difficulty, Compatibility
2008	Telenko, Seepersad, Webber	A Compilation of Design for Environment Principles and Guidelines	Designer Orientation, Actionability, Applicability, Positive Imperative
2012	Birch, Hon, Short	Structure and output mechanisms in Design for Environment (DfE) tools	Output mechanisms, effectiveness
2012	Bovea, Pérez-Belis	A taxonomy of ecodesign tools for integrating environmental requirements into the product design process	Objective, Difficulty, Time Requirements, Product Development Phase, Input Data Requirement, Product Requirements, Life Cycle Perspective, Resulting Data Type
2012	Poulikidou	A literature review on methods and tools for environmentally friendly product design and development	Objective, Applicability, Life Cycle Perspective, Environmental Impact Categories, Impact Prioritization, Product Prioritization, Input Data Requirements, Complexity, Difficulty, Product Development Phase
2013	Lindahl, Ekerman	Structure for Categorization of EcoDesign Methods and Tools	Product Development Phase, Resulting Data Type, Time Requirements, Difficulty, Life Cycle Perspective, Availability
2015	Doualle, Medini, Boucher, Laforest	Investigating Sustainability Assessment Methods of Product-service Systems	Dimensions of Sustainability, Product Development Phase, Applicability
2015	Pigosso, McAloone, Rozenfeld	Characterization of the State-of-the-art and Identification of Main Trends for Ecodesign Tools and Methods: Classifying Three Decades of Research and Implementation	Applicability, Dimensions of Sustainability, Designer Orientation, Scope
2016	Rossi, Germani, Zamagni	Review of ecodesign methods and tools. Barriers and strategies for an effective implementation in industrial companies	Scope, Barriers, Weaknesses, Potential Improvements, Examples
2017	Rousseaux, Gremy-Gros, Bonnin, Henriel-Ricordel, Bernard, Floury, Staigre, Vincent	“Eco-tool-seeker”: A new and unique business guide for choosing ecodesign tools	Objective, Scope, Resulting Data Type, Implementation, Motivation Applicability
2018	Ahmad, Wong, Tseng, Wong	Sustainable product design and development: A review of tools, applications and research prospects	Life Cycle Stage, Resulting Data Type, Product Development Phase, Origin

## Sheet: P6 - Framework Proposal
Year	Author(s)	Title	What is the framework about?
1994	Keioleian, Menerey	Sustainable Development by Design: Review of Life Cycle Design and Related Approaches	Life Cycle Design (LCD)
1995	Lenox, Ehrenfeld	Design for Environment: A New Framework for Strategic Decisions	Design for Environment (DfE)
2002	Rounds, Cooper	Development of product design requirements using taxonomies of environmental issues	Taxonomies of Environmental Concerns
2009	Sutcliffe, Maier, Moultrie, Clarkson	Development of a framework for assessing sustainability in new product development	Assessing Sustainability in Product Development
2010	Dusch, Crilly, Moultrie	Developing a Framework for Mapping Sustainable Design Activities	Mapping Sustainable Design Activities
2010	Rio, Reyes, Roucoules	A framework for ecodesign: an interface between LCA and design process	Interface Between Life Cycle Assessment (LCA) and the Design Process
2011	Klewitz, Hansen	Sustainability-oriented innovation of SMEs: A systematic review of existing practices and actors involved	Sustainability-Oriented Innovation (SOI) in Small and Medium Sized Enterprizes (SME)
2012	Blizzard, Klotz	A framework for sustainable whole systems design	Whole Systems Design (WSD)
2012	Chiu, Chu	Review of sustainable product design from life cycle perspectives	Structuring Sustainable Design Efforts
2012	Gagnon, Leduc, Savard	From a conventional to a sustainable engineering design process: different shades of sustainability	Sustainable Design Process
2013	Zhang, Rio, Allais, Zwolinski, Reyes Carrillo, Roucoules, Mercier-Laurent, Buclet	Toward an systemic navigation framework to integrate sustainable development into the company	Integrating Sustainable Design into the Company
2014	Klewitz, Hansen	Sustainability-oriented innovation of SMEs: a systematic review	Sustainability-Oriented Innovation (SOI) in Small and Medium Sized Enterprizes (SME)
2014	Bocken, Short, Rana, Evans	A literature and practice review to develop sustainable business model archetypes	Sustainable Business Model Archetypes
2015	Brones, de Carvalho	From 50 to 1: Integrating literature toward a systemic ecodesign model	Systemic Ecodesign Model
2015	Gaziulusoy, Brezet	Design for system innovations and transitions: A conceptual framework integrating insights from sustainablity science and theories of system innovations and transitions	Integrating Sustainability, Systems Innovation and Transitions
2017	Tecchio, McAlister, Mathieux, Ardente	In search of standards to support circularity in product policies: A systematic approach	Mapping Material Efficiency Considerations
2018	de Medeiros, Lago, Colling, Ribeiro, Marcon	Proposal of a Novel Reference System for the Green Product Development Process (GPDP)	Reference System for the Green Product Development Process

## Sheet: P7 - Theses
Year	Author(s)	Title	What is the thesis about?
1996	Dewberry	Ecodesign	Ecodesign
2000	Ritzén	Integrating Environmental Aspects into Product Development - Proactive Measures	Proactive Measures
2000	Sherwin	Innovative ecodesign: an exploratory and descriptive study of industrial design practice	Industrial Design Practice
2004	Wigum	Human and ecological problem solving through radical design thinking	Radical Design Thinking
2005	Lindahl	Engineering designers/designers/engineers' Requirements on Design for Environment Methods and Tools	Requirements for Methods and Tools
2005	Rocchi	Enhancing sustainable innovation by design. An approach to the co-creation of economic, social and environmental value	Co-Creation of Economic, Social and Environmental Value
2012	Ceschin	The introduction and scaling up of sustainable Product-Service Systems: A new role for strategic design for sustainability	Scaling Sustainable Product Service Systems
2012	Pigosso	Ecodesign Maturity Model: a framework to support companies in the selection and implementation of ecodesign practices	Ecodesign Maturity Model for Companies
2012	Thompson	Integrating a Strategic Sustainable Development Perspective in Product Service System Innovation	Strategic Sustainable Development ind Product Service System Innovation
